# Supplementary material for: A Novel Pyroptosis-Related Signature for Predicting Prognosis and Indicating Immune Microenvironment Features in Osteosarcoma
Source: Frontiers journal article supplement (doi:10.3389/fgene.2021.780780), 2021-11-26
Supplement: Data_Sheet_2.ZIP [file Data_Sheet_2.ZIP]

## Sheet: TARGET-OS.survival
sample	OS	_PATIENT	OS.time
TARGET-40-PARVXK-01A	0	TARGET-40-PARVXK	70
TARGET-40-PAMRHD-01A	1	TARGET-40-PAMRHD	74
TARGET-40-PAPVYW-01A	1	TARGET-40-PAPVYW	78
TARGET-40-NAAHCN-01A	0	TARGET-40-NAAHCN	92
TARGET-40-NAAHCN-02A	0	TARGET-40-NAAHCN	92
TARGET-40-PAVXDP-01A	0	TARGET-40-PAVXDP	124
TARGET-40-NAAHCT-01A	1	TARGET-40-NAAHCT	178
TARGET-40-NAAHCT-06A	1	TARGET-40-NAAHCT	178
TARGET-40-PAMLKS-01A	1	TARGET-40-PAMLKS	180
TARGET-40-PAUVKL-02A	1	TARGET-40-PAUVKL	183
TARGET-40-PAVUKR-01A	0	TARGET-40-PAVUKR	187
TARGET-40-NAAHCD-01A	1	TARGET-40-NAAHCD	199
TARGET-40-PAVTME-01A	0	TARGET-40-PAVTME	208
TARGET-40-NAAGJZ-11A	1	TARGET-40-NAAGJZ	222
TARGET-40-NAAGJZ-01A	1	TARGET-40-NAAGJZ	222
TARGET-40-NAAHCF-01A	1	TARGET-40-NAAHCF	225
TARGET-40-PAVRYF-01A	0	TARGET-40-PAVRYF	239
TARGET-40-PASFIW-01A	1	TARGET-40-PASFIW	244
TARGET-40-NAAHBZ-01A	1	TARGET-40-NAAHBZ	249
TARGET-40-PAVMMV-01A	1	TARGET-40-PAVMMV	254
TARGET-40-PAVPHS-01A	0	TARGET-40-PAVPHS	265
TARGET-40-NAAIBW-01A	0	TARGET-40-NAAIBW	268
TARGET-40-PAMYYJ-01A	1	TARGET-40-PAMYYJ	271
TARGET-40-PARBGW-01A	0	TARGET-40-PARBGW	286
TARGET-40-0A4HY5-01A	1	TARGET-40-0A4HY5	290
TARGET-40-PANPUM-01A	1	TARGET-40-PANPUM	295
TARGET-40-PAVLPS-01A	0	TARGET-40-PAVLPS	299
TARGET-40-PAVMEM-01A	0	TARGET-40-PAVMEM	306
TARGET-40-PATEJE-01A	1	TARGET-40-PATEJE	323
TARGET-40-PAVLIB-01A	0	TARGET-40-PAVLIB	328
TARGET-40-PAUVUL-01A	1	TARGET-40-PAUVUL	347
TARGET-40-PARGNA-01A	1	TARGET-40-PARGNA	359
TARGET-40-NAAEDI-06A	1	TARGET-40-NAAEDI	361
TARGET-40-NAAEDI-08A	1	TARGET-40-NAAEDI	361
TARGET-40-NAAGKN-01A	1	TARGET-40-NAAGKN	361
TARGET-40-NAAHCK-01A	0	TARGET-40-NAAHCK	365
TARGET-40-NAAHCJ-02A	0	TARGET-40-NAAHCJ	368
TARGET-40-NAAHCJ-01A	0	TARGET-40-NAAHCJ	368
TARGET-40-NAAGJU-01A	1	TARGET-40-NAAGJU	368
TARGET-40-NAAGJU-11A	1	TARGET-40-NAAGJU	368
TARGET-40-PAVDTY-01A	0	TARGET-40-PAVDTY	369
TARGET-40-PARRXH-02A	1	TARGET-40-PARRXH	371
TARGET-40-PAVCHD-01A	0	TARGET-40-PAVCHD	372
TARGET-40-PAUHGA-01A	1	TARGET-40-PAUHGA	374
TARGET-40-0A4HMC-01A	0	TARGET-40-0A4HMC	377
TARGET-40-NAAEDD-01A	1	TARGET-40-NAAEDD	378
TARGET-40-NAAEDD-06A	1	TARGET-40-NAAEDD	378
TARGET-40-PATMXR-01A	1	TARGET-40-PATMXR	386
TARGET-40-NAASJI-01A	1	TARGET-40-NAASJI	388
TARGET-40-PAVHJH-01A	0	TARGET-40-PAVHJH	411
TARGET-40-PAPKWD-01A	1	TARGET-40-PAPKWD	422
TARGET-40-PARUUW-01A	1	TARGET-40-PARUUW	428
TARGET-40-NAAHCI-01A	0	TARGET-40-NAAHCI	437
TARGET-40-NAAHCI-02A	0	TARGET-40-NAAHCI	437
TARGET-40-NAAGJY-11A	1	TARGET-40-NAAGJY	445
TARGET-40-NAAGJY-01A	1	TARGET-40-NAAGJY	445
TARGET-40-NAAHCH-02A	0	TARGET-40-NAAHCH	448
TARGET-40-NAAHCH-01A	0	TARGET-40-NAAHCH	448
TARGET-40-NAAECZ-01A	1	TARGET-40-NAAECZ	449
TARGET-40-NAAHBW-02A	1	TARGET-40-NAAHBW	464
TARGET-40-NAAHBW-01A	1	TARGET-40-NAAHBW	464
TARGET-40-PAVDSN-01A	1	TARGET-40-PAVDSN	466
TARGET-40-PAVEMA-01A	0	TARGET-40-PAVEMA	466
TARGET-40-PAVECB-01A	0	TARGET-40-PAVECB	476
TARGET-40-NAAHBP-02A	1	TARGET-40-NAAHBP	478
TARGET-40-NAAHBP-01A	1	TARGET-40-NAAHBP	478
TARGET-40-PAVDYY-01A	0	TARGET-40-PAVDYY	480
TARGET-40-NAAEDA-06A	1	TARGET-40-NAAEDA	503
TARGET-40-NAAEDA-01A	1	TARGET-40-NAAEDA	503
TARGET-40-PATUXZ-01A	1	TARGET-40-PATUXZ	510
TARGET-40-PAVCLP-01A	0	TARGET-40-PAVCLP	511
TARGET-40-NAAGKH-01A	1	TARGET-40-NAAGKH	514
TARGET-40-0A4I0Q-01A	1	TARGET-40-0A4I0Q	519
TARGET-40-NAAHBR-01A	1	TARGET-40-NAAHBR	536
TARGET-40-NAAHBR-02A	1	TARGET-40-NAAHBR	536
TARGET-40-PAUTYB-01A	1	TARGET-40-PAUTYB	537
TARGET-40-PASKZZ-01A	0	TARGET-40-PASKZZ	542
TARGET-40-NAAHCM-01A	1	TARGET-40-NAAHCM	542
TARGET-40-PAVALD-01A	0	TARGET-40-PAVALD	551
TARGET-40-PAUYTT-01A	0	TARGET-40-PAUYTT	579
TARGET-40-NAAGJS-11A	1	TARGET-40-NAAGJS	598
TARGET-40-NAAGJS-01A	1	TARGET-40-NAAGJS	598
TARGET-40-0A4I0S-01A	0	TARGET-40-0A4I0S	603
TARGET-40-0A4I5B-01A	0	TARGET-40-0A4I5B	619
TARGET-40-0A4I42-01A	1	TARGET-40-0A4I42	619
TARGET-40-0A4I4O-01A	1	TARGET-40-0A4I4O	627
TARGET-40-PATEAN-06A	1	TARGET-40-PATEAN	630
TARGET-40-PARFTG-01A	1	TARGET-40-PARFTG	653
TARGET-40-NAAHCY-01A	1	TARGET-40-NAAHCY	660
TARGET-40-NAAHCY-02A	1	TARGET-40-NAAHCY	660
TARGET-40-NAAHBU-01A	0	TARGET-40-NAAHBU	662
TARGET-40-NAAHBU-02A	0	TARGET-40-NAAHBU	662
TARGET-40-PAUUML-01A	0	TARGET-40-PAUUML	672
TARGET-40-NAAIBU-01A	0	TARGET-40-NAAIBU	675
TARGET-40-PARDAX-01A	1	TARGET-40-PARDAX	679
TARGET-40-NAAHCR-01A	0	TARGET-40-NAAHCR	682
TARGET-40-0A4I0W-01A	0	TARGET-40-0A4I0W	683
TARGET-40-PAUTWB-01A	0	TARGET-40-PAUTWB	687
TARGET-40-0A4I4M-01A	0	TARGET-40-0A4I4M	708
TARGET-40-NAAGJR-11A	1	TARGET-40-NAAGJR	718
TARGET-40-NAAGJR-01A	1	TARGET-40-NAAGJR	718
TARGET-40-PAUXPZ-01A	0	TARGET-40-PAUXPZ	724
TARGET-40-PAVFYF-01A	0	TARGET-40-PAVFYF	727
TARGET-40-PATADB-01A	0	TARGET-40-PATADB	741
TARGET-40-PAIWEV-01A	1	TARGET-40-PAIWEV	749
TARGET-40-PAMZAA-01A	1	TARGET-40-PAMZAA	752
TARGET-40-PALECC-01A	1	TARGET-40-PALECC	754
TARGET-40-NAASJK-01A	1	TARGET-40-NAASJK	756
TARGET-40-PATKSS-01A	1	TARGET-40-PATKSS	758
TARGET-40-PANMIG-01A	1	TARGET-40-PANMIG	776
TARGET-40-PANMGS-01A	0	TARGET-40-PANMGS	782
TARGET-40-0A4I8S-01A	1	TARGET-40-0A4I8S	788
TARGET-40-PAMCVZ-01A	1	TARGET-40-PAMCVZ	809
TARGET-40-PAIXFY-01A	1	TARGET-40-PAIXFY	812
TARGET-40-PAUKXW-01A	0	TARGET-40-PAUKXW	819
TARGET-40-NAAHBT-01A	0	TARGET-40-NAAHBT	834
TARGET-40-NAAHBT-02A	0	TARGET-40-NAAHBT	834
TARGET-40-NAAHBY-02A	1	TARGET-40-NAAHBY	851
TARGET-40-NAAHBY-01A	1	TARGET-40-NAAHBY	851
TARGET-40-PAUJZR-01A	0	TARGET-40-PAUJZR	853
TARGET-40-PAMEKS-01A	1	TARGET-40-PAMEKS	857
TARGET-40-NAAEDG-01A	1	TARGET-40-NAAEDG	877
TARGET-40-0A4I8O-01A	1	TARGET-40-0A4I8O	909
TARGET-40-NAAHBS-01A	1	TARGET-40-NAAHBS	911
TARGET-40-PAKFVX-01A	0	TARGET-40-PAKFVX	922
TARGET-40-PAPNVD-01A	1	TARGET-40-PAPNVD	922
TARGET-40-0A4I5I-01A	0	TARGET-40-0A4I5I	925
TARGET-40-NAAHDC-01A	1	TARGET-40-NAAHDC	941
TARGET-40-NAAHDC-02A	1	TARGET-40-NAAHDC	941
TARGET-40-PASNCK-01A	1	TARGET-40-PASNCK	953
TARGET-40-0A4I8U-01A	0	TARGET-40-0A4I8U	983
TARGET-40-PAMVMI-01A	1	TARGET-40-PAMVMI	989
TARGET-40-PALFYN-01A	1	TARGET-40-PALFYN	1003
TARGET-40-PAMPSS-01A	1	TARGET-40-PAMPSS	1004
TARGET-40-NAAHDM-01A	1	TARGET-40-NAAHDM	1021
TARGET-40-NAAEDH-06A	1	TARGET-40-NAAEDH	1023
TARGET-40-NAAEDH-01A	1	TARGET-40-NAAEDH	1023
TARGET-40-NAAEDH-08A	1	TARGET-40-NAAEDH	1023
TARGET-40-PAUBIT-01A	0	TARGET-40-PAUBIT	1029
TARGET-40-NAAGJM-01A	1	TARGET-40-NAAGJM	1036
TARGET-40-NAAGJM-11A	1	TARGET-40-NAAGJM	1036
TARGET-40-PALPAX-01A	1	TARGET-40-PALPAX	1037
TARGET-40-PARKAF-01A	1	TARGET-40-PARKAF	1061
TARGET-40-PANVLW-01A	0	TARGET-40-PANVLW	1084
TARGET-40-PANDMD-01A	1	TARGET-40-PANDMD	1088
TARGET-40-NAAHDL-01A	0	TARGET-40-NAAHDL	1097
TARGET-40-PATNLI-01A	0	TARGET-40-PATNLI	1112
TARGET-40-PATLGY-01A	0	TARGET-40-PATLGY	1122
TARGET-40-NAAHBM-06A	0	TARGET-40-NAAHBM	1132
TARGET-40-NAAHBM-01A	0	TARGET-40-NAAHBM	1132
TARGET-40-NAAHBM-02A	0	TARGET-40-NAAHBM	1132
TARGET-40-PATNZB-01A	1	TARGET-40-PATNZB	1203
TARGET-40-PANXSC-01A	0	TARGET-40-PANXSC	1217
TARGET-40-PANNCR-01A	0	TARGET-40-PANNCR	1231
TARGET-40-0A4HYB-01A	0	TARGET-40-0A4HYB	1240
TARGET-40-NAAHDA-01A	1	TARGET-40-NAAHDA	1242
TARGET-40-NAAEDB-01A	1	TARGET-40-NAAEDB	1249
TARGET-40-PANFZN-01A	0	TARGET-40-PANFZN	1254
TARGET-40-NAAHBV-01A	0	TARGET-40-NAAHBV	1260
TARGET-40-NAAHDN-01A	0	TARGET-40-NAAHDN	1263
TARGET-40-PANZHX-01A	0	TARGET-40-PANZHX	1323
TARGET-40-PATXFN-01A	0	TARGET-40-PATXFN	1363
TARGET-40-PATEEM-01A	0	TARGET-40-PATEEM	1451
TARGET-40-PAMXGP-01A	1	TARGET-40-PAMXGP	1460
TARGET-40-PANBZI-01A	1	TARGET-40-PANBZI	1465
TARGET-40-PATPBS-01A	0	TARGET-40-PATPBS	1468
TARGET-40-NAAGJX-11A	1	TARGET-40-NAAGJX	1475
TARGET-40-NAAGJX-01A	1	TARGET-40-NAAGJX	1475
TARGET-40-PAKZZK-01A	1	TARGET-40-PAKZZK	1515
TARGET-40-NAAHAB-01A	1	TARGET-40-NAAHAB	1520
TARGET-40-NAAHDJ-01A	0	TARGET-40-NAAHDJ	1534
TARGET-40-PANZZJ-01A	0	TARGET-40-PANZZJ	1538
TARGET-40-PATJVI-01A	0	TARGET-40-PATJVI	1575
TARGET-40-PATMPU-01A	1	TARGET-40-PATMPU	1579
TARGET-40-PATMIF-01A	0	TARGET-40-PATMIF	1579
TARGET-40-0A4I4A-01A	0	TARGET-40-0A4I4A	1583
TARGET-40-PATLYM-01A	0	TARGET-40-PATLYM	1603
TARGET-40-0A4I48-01A	0	TARGET-40-0A4I48	1616
TARGET-40-PASUUH-01A	0	TARGET-40-PASUUH	1625
TARGET-40-0A4HXV-01A	1	TARGET-40-0A4HXV	1627
TARGET-40-PARJXU-01A	1	TARGET-40-PARJXU	1631
TARGET-40-0A4I3W-01A	1	TARGET-40-0A4I3W	1637
TARGET-40-NAAHDK-06A	0	TARGET-40-NAAHDK	1649
TARGET-40-NAAHDK-01A	0	TARGET-40-NAAHDK	1649
TARGET-40-NAAHDK-02A	0	TARGET-40-NAAHDK	1649
TARGET-40-PARTUG-01A	1	TARGET-40-PARTUG	1672
TARGET-40-PATFVE-01A	0	TARGET-40-PATFVE	1695
TARGET-40-PATAWV-01A	0	TARGET-40-PATAWV	1702
TARGET-40-PASRNE-01A	0	TARGET-40-PASRNE	1707
TARGET-40-PAPIJR-01A	0	TARGET-40-PAPIJR	1719
TARGET-40-PASNZV-01A	0	TARGET-40-PASNZV	1747
TARGET-40-0A4HX8-01A	0	TARGET-40-0A4HX8	1750
TARGET-40-PATADX-01A	0	TARGET-40-PATADX	1754
TARGET-40-NAAHCE-01A	0	TARGET-40-NAAHCE	1785
TARGET-40-NAAHCE-02A	0	TARGET-40-NAAHCE	1785
TARGET-40-PASEHK-01A	0	TARGET-40-PASEHK	1790
TARGET-40-0A4I3S-01A	0	TARGET-40-0A4I3S	1844
TARGET-40-NAAHBL-01A	0	TARGET-40-NAAHBL	1846
TARGET-40-NAAGZZ-01A	0	TARGET-40-NAAGZZ	1855
TARGET-40-NAAHDI-01A	0	TARGET-40-NAAHDI	1863
TARGET-40-PASSLM-01A	0	TARGET-40-PASSLM	1865
TARGET-40-NAAGKM-01A	0	TARGET-40-NAAGKM	1868
TARGET-40-PASYUK-01A	0	TARGET-40-PASYUK	1869
TARGET-40-PASDUJ-01A	0	TARGET-40-PASDUJ	1895
TARGET-40-NAAGZY-01A	0	TARGET-40-NAAGZY	1900
TARGET-40-0A4I6O-01A	1	TARGET-40-0A4I6O	1906
TARGET-40-PASJST-01A	0	TARGET-40-PASJST	1911
TARGET-40-NAAGJL-01A	1	TARGET-40-NAAGJL	1912
TARGET-40-NAAGZX-01A	0	TARGET-40-NAAGZX	1913
TARGET-40-PAMHLF-01A	0	TARGET-40-PAMHLF	1913
TARGET-40-NAAHCC-01A	0	TARGET-40-NAAHCC	1928
TARGET-40-NAAHCL-01A	0	TARGET-40-NAAHCL	1953
TARGET-40-NAAGJW-01A	0	TARGET-40-NAAGJW	1965
TARGET-40-0A4I9I-01A	1	TARGET-40-0A4I9I	2014
TARGET-40-NAAGKD-01A	1	TARGET-40-NAAGKD	2022
TARGET-40-PASEBY-01A	0	TARGET-40-PASEBY	2049
TARGET-40-PASFCV-01A	0	TARGET-40-PASFCV	2062
TARGET-40-NAAGJV-01A	0	TARGET-40-NAAGJV	2105
TARGET-40-NAAGKL-01A	0	TARGET-40-NAAGKL	2111
TARGET-40-PASEFS-01A	0	TARGET-40-PASEFS	2112
TARGET-40-PALKGN-01A	0	TARGET-40-PALKGN	2122
TARGET-40-PANSAN-01A	0	TARGET-40-PANSAN	2131
TARGET-40-NAAGZW-06A	0	TARGET-40-NAAGZW	2149
TARGET-40-PARYDD-01A	0	TARGET-40-PARYDD	2150
TARGET-40-PALWWX-01A	0	TARGET-40-PALWWX	2163
TARGET-40-NAAHDF-02A	0	TARGET-40-NAAHDF	2185
TARGET-40-NAAHDF-01A	0	TARGET-40-NAAHDF	2185
TARGET-40-PARXNJ-01A	0	TARGET-40-PARXNJ	2215
TARGET-40-0A4I0U-01A	0	TARGET-40-0A4I0U	2216
TARGET-40-PARZAR-01A	0	TARGET-40-PARZAR	2218
TARGET-40-PANSEN-01A	0	TARGET-40-PANSEN	2256
TARGET-40-0A4I9K-01A	0	TARGET-40-0A4I9K	2257
TARGET-40-PARVEF-01A	0	TARGET-40-PARVEF	2314
TARGET-40-PANGCY-01A	0	TARGET-40-PANGCY	2376
TARGET-40-NAAHDE-02A	0	TARGET-40-NAAHDE	2439
TARGET-40-NAAHDE-01A	0	TARGET-40-NAAHDE	2439
TARGET-40-PARKBJ-01A	0	TARGET-40-PARKBJ	2462
TARGET-40-PAKXLD-01A	0	TARGET-40-PAKXLD	2462
TARGET-40-NAAHCU-01A	1	TARGET-40-NAAHCU	2482
TARGET-40-NAAHDD-01A	0	TARGET-40-NAAHDD	2501
TARGET-40-PAPWWC-01A	0	TARGET-40-PAPWWC	2520
TARGET-40-PAPXGT-01A	0	TARGET-40-PAPXGT	2526
TARGET-40-NAAGJT-01A	1	TARGET-40-NAAGJT	2582
TARGET-40-PARGTM-01A	0	TARGET-40-PARGTM	2610
TARGET-40-NAAGKK-01A	1	TARGET-40-NAAGKK	2641
TARGET-40-PAKGVJ-01A	0	TARGET-40-PAKGVJ	2758
TARGET-40-PAPXWB-01A	0	TARGET-40-PAPXWB	2777
TARGET-40-NAAHBN-01A	0	TARGET-40-NAAHBN	2806
TARGET-40-NAAHCP-01A	0	TARGET-40-NAAHCP	2824
TARGET-40-PALZGU-01A	1	TARGET-40-PALZGU	2882
TARGET-40-PAKRHV-01A	0	TARGET-40-PAKRHV	2883
TARGET-40-NAAHDB-01A	0	TARGET-40-NAAHDB	2888
TARGET-40-0A4I65-01A	0	TARGET-40-0A4I65	2895
TARGET-40-PAPKME-01A	0	TARGET-40-PAPKME	2915
TARGET-40-0A4HXS-01A	0	TARGET-40-0A4HXS	2948
TARGET-40-0A4HXO-01A	0	TARGET-40-0A4HXO	2983
TARGET-40-NAAHBI-02A	1	TARGET-40-NAAHBI	2984
TARGET-40-NAAHBI-01A	1	TARGET-40-NAAHBI	2984
TARGET-40-PAMTCM-01A	0	TARGET-40-PAMTCM	3002
TARGET-40-NAAHCX-01A	0	TARGET-40-NAAHCX	3033
TARGET-40-PANVJJ-01A	0	TARGET-40-PANVJJ	3095
TARGET-40-NAAGJN-01A	1	TARGET-40-NAAGJN	3141
TARGET-40-NAAGJN-11A	1	TARGET-40-NAAGJN	3141
TARGET-40-NAAGKI-01A	0	TARGET-40-NAAGKI	3185
TARGET-40-PALKDP-01A	0	TARGET-40-PALKDP	3282
TARGET-40-NAAHBK-01A	0	TARGET-40-NAAHBK	3367
TARGET-40-PANGPE-01A	0	TARGET-40-PANGPE	3378
TARGET-40-PANGRW-01A	0	TARGET-40-PANGRW	3378
TARGET-40-NAAHCV-01A	0	TARGET-40-NAAHCV	3389
TARGET-40-NAAHCW-01A	0	TARGET-40-NAAHCW	3417
TARGET-40-NAAGJP-11A	0	TARGET-40-NAAGJP	3443
TARGET-40-NAAGJP-01A	0	TARGET-40-NAAGJP	3443
TARGET-40-NAAGKF-01A	0	TARGET-40-NAAGKF	3784
TARGET-40-NAAHBH-01A	0	TARGET-40-NAAHBH	3885
TARGET-40-PAMHYN-01A	0	TARGET-40-PAMHYN	3899
TARGET-40-NAAHCG-01A	0	TARGET-40-NAAHCG	3915
TARGET-40-NAAHCG-02A	0	TARGET-40-NAAHCG	3915
TARGET-40-0A4HLD-01A	0	TARGET-40-0A4HLD	3946
TARGET-40-PAMJXS-01A	0	TARGET-40-PAMJXS	3976
TARGET-40-NAAGKG-01A	0	TARGET-40-NAAGKG	4113
TARGET-40-PALIXF-11A	0	TARGET-40-PALIXF	4355
TARGET-40-PALIXF-01A	0	TARGET-40-PALIXF	4355
TARGET-40-PALHRL-01A	0	TARGET-40-PALHRL	4374
TARGET-40-NAAGKC-01A	0	TARGET-40-NAAGKC	4770
TARGET-40-NAAGJK-11A	0	TARGET-40-NAAGJK	5033
TARGET-40-NAAGJK-01A	0	TARGET-40-NAAGJK	5033
TARGET-40-NAAHBJ-01A	0	TARGET-40-NAAHBJ	5096
TARGET-40-NAAGKA-01A	0	TARGET-40-NAAGKA	5302
