# Supplementary material for: A Novel Pyroptosis-Related Signature for Predicting Prognosis and Indicating Immune Microenvironment Features in Osteosarcoma
Source: Front Genet. 2021 Nov 26;12:780780. doi: 10.3389/fgene.2021.780780 (PMC8662937; doi:10.3389/fgene.2021.780780)
Supplement: Supplementary file 2 [file DataSheet4.ZIP › GTEX_phenotype.xlsx]

## Sheet: Sheet1
Sample	body_site_detail (SMTSD)	_primary_site	_gender	_patient	_cohort
GTEX-1117F-0226-SM-5GZZ7	Adipose - Subcutaneous	Adipose Tissue	female	GTEX-1117F	GTEX
GTEX-1117F-0426-SM-5EGHI	Muscle - Skeletal	Muscle	female	GTEX-1117F	GTEX
GTEX-1117F-0526-SM-5EGHJ	Artery - Tibial	Blood Vessel	female	GTEX-1117F	GTEX
GTEX-1117F-0626-SM-5N9CS	Artery - Coronary	Blood Vessel	female	GTEX-1117F	GTEX
GTEX-1117F-0726-SM-5GIEN	Heart - Atrial Appendage	Heart	female	GTEX-1117F	GTEX
GTEX-1117F-1326-SM-5EGHH	Adipose - Visceral (Omentum)	Adipose Tissue	female	GTEX-1117F	GTEX
GTEX-1117F-2226-SM-5N9CH	Ovary	Ovary	female	GTEX-1117F	GTEX
GTEX-1117F-2426-SM-5EGGH	Uterus	Uterus	female	GTEX-1117F	GTEX
GTEX-1117F-2526-SM-5GZY6	Vagina	Vagina	female	GTEX-1117F	GTEX
GTEX-1117F-2826-SM-5GZXL	Breast - Mammary Tissue	Breast	female	GTEX-1117F	GTEX
GTEX-1117F-2926-SM-5GZYI	Skin - Not Sun Exposed (Suprapubic)	Skin	female	GTEX-1117F	GTEX
GTEX-1117F-3026-SM-5GZYU	Minor Salivary Gland	Salivary Gland	female	GTEX-1117F	GTEX
GTEX-1117F-3226-SM-5N9CT	Brain - Cortex	Brain	female	GTEX-1117F	GTEX
GTEX-111CU-0126-SM-5GZWZ	Adrenal Gland	Adrenal Gland	male	GTEX-111CU	GTEX
GTEX-111CU-0226-SM-5GZXC	Thyroid	Thyroid	male	GTEX-111CU	GTEX
GTEX-111CU-0326-SM-5GZXO	Lung	Lung	male	GTEX-111CU	GTEX
GTEX-111CU-0426-SM-5GZY1	Spleen	Spleen	male	GTEX-111CU	GTEX
GTEX-111CU-0526-SM-5EGHK	Pancreas	Pancreas	male	GTEX-111CU	GTEX
GTEX-111CU-0626-SM-5EGHL	Esophagus - Muscularis	Esophagus	male	GTEX-111CU	GTEX
GTEX-111CU-0726-SM-5GZYD	Esophagus - Mucosa	Esophagus	male	GTEX-111CU	GTEX
GTEX-111CU-0826-SM-5EGIJ	Esophagus - Gastroesophageal Junction	Esophagus	male	GTEX-111CU	GTEX
GTEX-111CU-0926-SM-5EGIK	Stomach	Stomach	male	GTEX-111CU	GTEX
GTEX-111CU-1026-SM-5EGIL	Adipose - Visceral (Omentum)	Adipose Tissue	male	GTEX-111CU	GTEX
GTEX-111CU-1126-SM-5EGIM	Skin - Not Sun Exposed (Suprapubic)	Skin	male	GTEX-111CU	GTEX
GTEX-111CU-1226-SM-5EGIN	Colon - Sigmoid	Colon	male	GTEX-111CU	GTEX
GTEX-111CU-1326-SM-5NQ8L	Small Intestine - Terminal Ileum	Small Intestine	male	GTEX-111CU	GTEX
GTEX-111CU-1426-SM-5GZYP	Colon - Transverse	Colon	male	GTEX-111CU	GTEX
GTEX-111CU-1526-SM-5N9FS	Prostate	Prostate	male	GTEX-111CU	GTEX
GTEX-111CU-1726-SM-5EGHM	Testis	Testis	male	GTEX-111CU	GTEX
GTEX-111CU-1826-SM-5GZYN	Adipose - Subcutaneous	Adipose Tissue	male	GTEX-111CU	GTEX
GTEX-111CU-1926-SM-5GZYZ	Skin - Sun Exposed (Lower leg)	Skin	male	GTEX-111CU	GTEX
GTEX-111CU-2026-SM-5GZZC	Muscle - Skeletal	Muscle	male	GTEX-111CU	GTEX
GTEX-111CU-2226-SM-5N9G5	Nerve - Tibial	Nerve	male	GTEX-111CU	GTEX
GTEX-111FC-0126-SM-5N9DL	Skin - Sun Exposed (Lower leg)	Skin	male	GTEX-111FC	GTEX
GTEX-111FC-0226-SM-5N9B8	Adipose - Subcutaneous	Adipose Tissue	male	GTEX-111FC	GTEX
GTEX-111FC-0326-SM-5GZZ1	Muscle - Skeletal	Muscle	male	GTEX-111FC	GTEX
GTEX-111FC-0426-SM-5N9CV	Artery - Tibial	Blood Vessel	male	GTEX-111FC	GTEX
GTEX-111FC-0526-SM-5GZZ8	Nerve - Tibial	Nerve	male	GTEX-111FC	GTEX
GTEX-111FC-0626-SM-5N9CU	Heart - Atrial Appendage	Heart	male	GTEX-111FC	GTEX
GTEX-111FC-0826-SM-5GZWO	Heart - Left Ventricle	Heart	male	GTEX-111FC	GTEX
GTEX-111FC-1026-SM-5GZX1	Thyroid	Thyroid	male	GTEX-111FC	GTEX
GTEX-111FC-1126-SM-5GZWU	Lung	Lung	male	GTEX-111FC	GTEX
GTEX-111FC-1326-SM-5N9D9	Spleen	Spleen	male	GTEX-111FC	GTEX
GTEX-111FC-1426-SM-5N9C7	Adipose - Subcutaneous	Adipose Tissue	male	GTEX-111FC	GTEX
GTEX-111FC-1926-SM-5GZYC	Testis	Testis	male	GTEX-111FC	GTEX
GTEX-111FC-2026-SM-5GZYO	Prostate	Prostate	male	GTEX-111FC	GTEX
GTEX-111FC-2526-SM-5GZXU	Skin - Not Sun Exposed (Suprapubic)	Skin	male	GTEX-111FC	GTEX
GTEX-111FC-2926-SM-5GZY7	Minor Salivary Gland	Salivary Gland	male	GTEX-111FC	GTEX
GTEX-111FC-3026-SM-5GZYJ	Pituitary	Pituitary	male	GTEX-111FC	GTEX
GTEX-111FC-3126-SM-5GZZ2	Brain - Cortex	Brain	male	GTEX-111FC	GTEX
GTEX-111FC-3326-SM-5GZYV	Brain - Cerebellum	Brain	male	GTEX-111FC	GTEX
GTEX-111VG-0008-SM-5Q5BG	Cells - Transformed fibroblasts	Skin	male	GTEX-111VG	GTEX
GTEX-111VG-0326-SM-5GZX7	Heart - Atrial Appendage	Heart	male	GTEX-111VG	GTEX
GTEX-111VG-0526-SM-5N9BW	Thyroid	Thyroid	male	GTEX-111VG	GTEX
GTEX-111VG-0726-SM-5GIDC	Lung	Lung	male	GTEX-111VG	GTEX
GTEX-111VG-1626-SM-5EGIO	Skin - Not Sun Exposed (Suprapubic)	Skin	male	GTEX-111VG	GTEX
GTEX-111VG-1926-SM-5GIDO	Testis	Testis	male	GTEX-111VG	GTEX
GTEX-111VG-2226-SM-5N9DU	Colon - Transverse	Colon	male	GTEX-111VG	GTEX
GTEX-111VG-2326-SM-5N9BK	Adipose - Subcutaneous	Adipose Tissue	male	GTEX-111VG	GTEX
GTEX-111VG-2426-SM-5GZXD	Skin - Sun Exposed (Lower leg)	Skin	male	GTEX-111VG	GTEX
GTEX-111VG-2526-SM-5GZXP	Nerve - Tibial	Nerve	male	GTEX-111VG	GTEX
GTEX-111VG-2626-SM-5GZY2	Muscle - Skeletal	Muscle	male	GTEX-111VG	GTEX
GTEX-111YS-0006-SM-5NQBE	Whole Blood	Blood	male	GTEX-111YS	GTEX
GTEX-111YS-0008-SM-5Q5BH	Cells - Transformed fibroblasts	Skin	male	GTEX-111YS	GTEX
GTEX-111YS-0126-SM-5987T	Adrenal Gland	Adrenal Gland	male	GTEX-111YS	GTEX
GTEX-111YS-0326-SM-5GZZ3	Heart - Atrial Appendage	Heart	male	GTEX-111YS	GTEX
GTEX-111YS-0426-SM-5987O	Heart - Left Ventricle	Heart	male	GTEX-111YS	GTEX
GTEX-111YS-0526-SM-5GZXJ	Artery - Aorta	Blood Vessel	male	GTEX-111YS	GTEX
GTEX-111YS-0626-SM-5GZXV	Lung	Lung	male	GTEX-111YS	GTEX
GTEX-111YS-0726-SM-5GZY8	Thyroid	Thyroid	male	GTEX-111YS	GTEX
GTEX-111YS-0826-SM-5GZYK	Esophagus - Gastroesophageal Junction	Esophagus	male	GTEX-111YS	GTEX
GTEX-111YS-0926-SM-5EGGI	Esophagus - Mucosa	Esophagus	male	GTEX-111YS	GTEX
GTEX-111YS-1026-SM-5GZYE	Esophagus - Muscularis	Esophagus	male	GTEX-111YS	GTEX
GTEX-111YS-1126-SM-5GZYQ	Stomach	Stomach	male	GTEX-111YS	GTEX
GTEX-111YS-1226-SM-5EGGJ	Pancreas	Pancreas	male	GTEX-111YS	GTEX
GTEX-111YS-1326-SM-5EGGK	Adipose - Visceral (Omentum)	Adipose Tissue	male	GTEX-111YS	GTEX
GTEX-111YS-1426-SM-5GID8	Small Intestine - Terminal Ileum	Small Intestine	male	GTEX-111YS	GTEX
GTEX-111YS-1526-SM-5GZYW	Skin - Not Sun Exposed (Suprapubic)	Skin	male	GTEX-111YS	GTEX
GTEX-111YS-1626-SM-5GZZ9	Colon - Transverse	Colon	male	GTEX-111YS	GTEX
GTEX-111YS-1726-SM-5GIED	Prostate	Prostate	male	GTEX-111YS	GTEX
GTEX-111YS-1826-SM-5GIEP	Colon - Sigmoid	Colon	male	GTEX-111YS	GTEX
GTEX-111YS-1926-SM-5GICC	Breast - Mammary Tissue	Breast	male	GTEX-111YS	GTEX
GTEX-111YS-2026-SM-5EGGL	Testis	Testis	male	GTEX-111YS	GTEX
GTEX-111YS-2126-SM-5EGGM	Nerve - Tibial	Nerve	male	GTEX-111YS	GTEX
GTEX-111YS-2226-SM-5987P	Artery - Tibial	Blood Vessel	male	GTEX-111YS	GTEX
GTEX-111YS-2326-SM-5987L	Muscle - Skeletal	Muscle	male	GTEX-111YS	GTEX
GTEX-111YS-2426-SM-5GZZQ	Adipose - Subcutaneous	Adipose Tissue	male	GTEX-111YS	GTEX
GTEX-1122O-0003-SM-5Q5DL	Cells - EBV-transformed lymphocytes	Blood	female	GTEX-1122O	GTEX
GTEX-1122O-0005-SM-5O99J	Whole Blood	Blood	female	GTEX-1122O	GTEX
GTEX-1122O-0008-SM-5QGR2	Cells - Transformed fibroblasts	Skin	female	GTEX-1122O	GTEX
GTEX-1122O-0126-SM-5GICA	Lung	Lung	female	GTEX-1122O	GTEX
GTEX-1122O-0226-SM-5N9DA	Thyroid	Thyroid	female	GTEX-1122O	GTEX
GTEX-1122O-0326-SM-5H124	Adrenal Gland	Adrenal Gland	female	GTEX-1122O	GTEX
GTEX-1122O-0426-SM-5H12G	Artery - Coronary	Blood Vessel	female	GTEX-1122O	GTEX
GTEX-1122O-0526-SM-5N9DM	Spleen	Spleen	female	GTEX-1122O	GTEX
GTEX-1122O-0626-SM-5N9B9	Heart - Atrial Appendage	Heart	female	GTEX-1122O	GTEX
GTEX-1122O-0726-SM-5GIEV	Pancreas	Pancreas	female	GTEX-1122O	GTEX
GTEX-1122O-0826-SM-5GICV	Heart - Left Ventricle	Heart	female	GTEX-1122O	GTEX
GTEX-1122O-0926-SM-5N9C9	Adipose - Visceral (Omentum)	Adipose Tissue	female	GTEX-1122O	GTEX
GTEX-1122O-1126-SM-5NQ8X	Artery - Aorta	Blood Vessel	female	GTEX-1122O	GTEX
GTEX-1122O-1226-SM-5H113	Breast - Mammary Tissue	Breast	female	GTEX-1122O	GTEX
GTEX-1122O-1326-SM-5H11F	Small Intestine - Terminal Ileum	Small Intestine	female	GTEX-1122O	GTEX
GTEX-1122O-1426-SM-5H11R	Colon - Sigmoid	Colon	female	GTEX-1122O	GTEX
GTEX-1122O-1526-SM-5N9CL	Colon - Transverse	Colon	female	GTEX-1122O	GTEX
GTEX-1122O-1626-SM-5N9CX	Esophagus - Muscularis	Esophagus	female	GTEX-1122O	GTEX
GTEX-1122O-1726-SM-5GICM	Esophagus - Mucosa	Esophagus	female	GTEX-1122O	GTEX
GTEX-1122O-1826-SM-5EGIP	Esophagus - Gastroesophageal Junction	Esophagus	female	GTEX-1122O	GTEX
GTEX-1122O-1926-SM-5EGIQ	Stomach	Stomach	female	GTEX-1122O	GTEX
GTEX-1122O-2026-SM-5NQ91	Adipose - Subcutaneous	Adipose Tissue	female	GTEX-1122O	GTEX
GTEX-1122O-2126-SM-5EGIR	Skin - Sun Exposed (Lower leg)	Skin	female	GTEX-1122O	GTEX
GTEX-1122O-2426-SM-5GIDN	Muscle - Skeletal	Muscle	female	GTEX-1122O	GTEX
GTEX-1128S-0005-SM-5P9HI	Whole Blood	Blood	female	GTEX-1128S	GTEX
GTEX-1128S-0008-SM-5Q5DP	Cells - Transformed fibroblasts	Skin	female	GTEX-1128S	GTEX
GTEX-1128S-0126-SM-5H12S	Thyroid	Thyroid	female	GTEX-1128S	GTEX
GTEX-1128S-0326-SM-5GZZF	Artery - Aorta	Blood Vessel	female	GTEX-1128S	GTEX
GTEX-1128S-0726-SM-5N9D6	Lung	Lung	female	GTEX-1128S	GTEX
GTEX-1128S-0826-SM-5GZZI	Pancreas	Pancreas	female	GTEX-1128S	GTEX
GTEX-1128S-0926-SM-5GZZU	Adipose - Visceral (Omentum)	Adipose Tissue	female	GTEX-1128S	GTEX
GTEX-1128S-1626-SM-5H12O	Colon - Transverse	Colon	female	GTEX-1128S	GTEX
GTEX-1128S-2126-SM-5H12U	Adipose - Subcutaneous	Adipose Tissue	female	GTEX-1128S	GTEX
GTEX-1128S-2326-SM-5GZZY	Skin - Sun Exposed (Lower leg)	Skin	female	GTEX-1128S	GTEX
GTEX-1128S-2426-SM-5H11B	Muscle - Skeletal	Muscle	female	GTEX-1128S	GTEX
GTEX-1128S-2526-SM-5H11N	Artery - Tibial	Blood Vessel	female	GTEX-1128S	GTEX
GTEX-1128S-2626-SM-5H11Z	Pituitary	Pituitary	female	GTEX-1128S	GTEX
GTEX-1128S-2726-SM-5H12C	Brain - Cortex	Brain	female	GTEX-1128S	GTEX
GTEX-1128S-2826-SM-5N9DI	Brain - Cerebellum	Brain	female	GTEX-1128S	GTEX
GTEX-113IC-0006-SM-5NQ9C	Whole Blood	Blood	male	GTEX-113IC	GTEX
GTEX-113IC-0008-SM-5QGRF	Cells - Transformed fibroblasts	Skin	male	GTEX-113IC	GTEX
GTEX-113IC-0126-SM-5HL6T	Skin - Sun Exposed (Lower leg)	Skin	male	GTEX-113IC	GTEX
GTEX-113IC-0226-SM-5HL5C	Adipose - Subcutaneous	Adipose Tissue	male	GTEX-113IC	GTEX
GTEX-113IC-0426-SM-5HL5O	Artery - Tibial	Blood Vessel	male	GTEX-113IC	GTEX
GTEX-113IC-0526-SM-5HL76	Nerve - Tibial	Nerve	male	GTEX-113IC	GTEX
GTEX-113JC-0006-SM-5O997	Whole Blood	Blood	female	GTEX-113JC	GTEX
GTEX-113JC-0008-SM-5QGR6	Cells - Transformed fibroblasts	Skin	female	GTEX-113JC	GTEX
GTEX-113JC-0126-SM-5EGJW	Thyroid	Thyroid	female	GTEX-113JC	GTEX
GTEX-113JC-0726-SM-5GZZR	Adipose - Visceral (Omentum)	Adipose Tissue	female	GTEX-113JC	GTEX
GTEX-113JC-0926-SM-5H114	Esophagus - Muscularis	Esophagus	female	GTEX-113JC	GTEX
GTEX-113JC-1026-SM-5H117	Esophagus - Gastroesophageal Junction	Esophagus	female	GTEX-113JC	GTEX
GTEX-113JC-1926-SM-5N9GE	Vagina	Vagina	female	GTEX-113JC	GTEX
GTEX-113JC-2226-SM-5EGJG	Uterus	Uterus	female	GTEX-113JC	GTEX
GTEX-113JC-2326-SM-5EQ4E	Skin - Sun Exposed (Lower leg)	Skin	female	GTEX-113JC	GTEX
GTEX-113JC-2726-SM-5EGIS	Muscle - Skeletal	Muscle	female	GTEX-113JC	GTEX
GTEX-113JC-2826-SM-5EGIT	Pituitary	Pituitary	female	GTEX-113JC	GTEX
GTEX-117XS-0005-SM-5PNU6	Whole Blood	Blood	male	GTEX-117XS	GTEX
GTEX-117XS-0008-SM-5Q5DQ	Cells - Transformed fibroblasts	Skin	male	GTEX-117XS	GTEX
GTEX-117XS-0426-SM-5GZZN	Artery - Aorta	Blood Vessel	male	GTEX-117XS	GTEX
GTEX-117XS-0526-SM-5987Q	Thyroid	Thyroid	male	GTEX-117XS	GTEX
GTEX-117XS-0726-SM-5H131	Heart - Atrial Appendage	Heart	male	GTEX-117XS	GTEX
GTEX-117XS-1926-SM-5GICO	Breast - Mammary Tissue	Breast	male	GTEX-117XS	GTEX
GTEX-117XS-2026-SM-5GID1	Testis	Testis	male	GTEX-117XS	GTEX
GTEX-117XS-2226-SM-5GIE1	Colon - Sigmoid	Colon	male	GTEX-117XS	GTEX
GTEX-117XS-2526-SM-5H11G	Muscle - Skeletal	Muscle	male	GTEX-117XS	GTEX
GTEX-117XS-2726-SM-5N9BL	Skin - Sun Exposed (Lower leg)	Skin	male	GTEX-117XS	GTEX
GTEX-117XS-2926-SM-5N9BX	Pituitary	Pituitary	male	GTEX-117XS	GTEX
GTEX-117XS-3026-SM-5N9CA	Brain - Cortex	Brain	male	GTEX-117XS	GTEX
GTEX-117XS-3126-SM-5GIDP	Brain - Cerebellum	Brain	male	GTEX-117XS	GTEX
GTEX-117YW-0005-SM-5NQ8Z	Whole Blood	Blood	male	GTEX-117YW	GTEX
GTEX-117YW-0008-SM-5QGRD	Cells - Transformed fibroblasts	Skin	male	GTEX-117YW	GTEX
GTEX-117YW-0126-SM-5EGGN	Thyroid	Thyroid	male	GTEX-117YW	GTEX
GTEX-117YW-0226-SM-5N9CM	Artery - Aorta	Blood Vessel	male	GTEX-117YW	GTEX
GTEX-117YW-0326-SM-5N9CY	Heart - Left Ventricle	Heart	male	GTEX-117YW	GTEX
GTEX-117YW-0426-SM-5GZZZ	Heart - Atrial Appendage	Heart	male	GTEX-117YW	GTEX
GTEX-117YW-0526-SM-5H11C	Lung	Lung	male	GTEX-117YW	GTEX
GTEX-117YW-0826-SM-5H11O	Adipose - Visceral (Omentum)	Adipose Tissue	male	GTEX-117YW	GTEX
GTEX-117YW-1426-SM-5EGGO	Prostate	Prostate	male	GTEX-117YW	GTEX
GTEX-117YW-1526-SM-5EGGP	Testis	Testis	male	GTEX-117YW	GTEX
GTEX-117YW-1826-SM-5PNY5	Colon - Transverse	Colon	male	GTEX-117YW	GTEX
GTEX-117YW-1926-SM-5H121	Esophagus - Mucosa	Esophagus	male	GTEX-117YW	GTEX
GTEX-117YW-2026-SM-5N9BH	Esophagus - Muscularis	Esophagus	male	GTEX-117YW	GTEX
GTEX-117YW-2226-SM-5N9DB	Stomach	Stomach	male	GTEX-117YW	GTEX
GTEX-117YW-2426-SM-5Q5AE	Muscle - Skeletal	Muscle	male	GTEX-117YW	GTEX
GTEX-117YW-2626-SM-5GZZH	Skin - Sun Exposed (Lower leg)	Skin	male	GTEX-117YW	GTEX
GTEX-117YW-2726-SM-5GZZT	Artery - Tibial	Blood Vessel	male	GTEX-117YW	GTEX
GTEX-117YW-2826-SM-5H116	Pituitary	Pituitary	male	GTEX-117YW	GTEX
GTEX-117YW-2926-SM-5GIEQ	Brain - Cortex	Brain	male	GTEX-117YW	GTEX
GTEX-117YX-0126-SM-5EGH5	Adrenal Gland	Adrenal Gland	male	GTEX-117YX	GTEX
GTEX-117YX-0226-SM-5EGH6	Pancreas	Pancreas	male	GTEX-117YX	GTEX
GTEX-117YX-0326-SM-5GICL	Small Intestine - Terminal Ileum	Small Intestine	male	GTEX-117YX	GTEX
GTEX-117YX-0526-SM-5EGJH	Colon - Sigmoid	Colon	male	GTEX-117YX	GTEX
GTEX-117YX-0626-SM-5EGJI	Heart - Atrial Appendage	Heart	male	GTEX-117YX	GTEX
GTEX-117YX-0726-SM-5GIET	Adipose - Visceral (Omentum)	Adipose Tissue	male	GTEX-117YX	GTEX
GTEX-117YX-0826-SM-5H11J	Colon - Transverse	Colon	male	GTEX-117YX	GTEX
GTEX-117YX-1026-SM-5H11V	Stomach	Stomach	male	GTEX-117YX	GTEX
GTEX-117YX-1126-SM-5H128	Heart - Left Ventricle	Heart	male	GTEX-117YX	GTEX
GTEX-117YX-1226-SM-5H11S	Thyroid	Thyroid	male	GTEX-117YX	GTEX
GTEX-117YX-1326-SM-5H125	Lung	Lung	male	GTEX-117YX	GTEX
GTEX-117YX-1426-SM-5H12H	Breast - Mammary Tissue	Breast	male	GTEX-117YX	GTEX
GTEX-117YX-1526-SM-5H12T	Prostate	Prostate	male	GTEX-117YX	GTEX
GTEX-117YX-1626-SM-5GZZG	Esophagus - Mucosa	Esophagus	male	GTEX-117YX	GTEX
GTEX-117YX-1726-SM-5GZZS	Artery - Coronary	Blood Vessel	male	GTEX-117YX	GTEX
GTEX-117YX-1826-SM-5H12K	Esophagus - Muscularis	Esophagus	male	GTEX-117YX	GTEX
GTEX-117YX-1926-SM-5GIEC	Skin - Not Sun Exposed (Suprapubic)	Skin	male	GTEX-117YX	GTEX
GTEX-117YX-2026-SM-5GIEF	Testis	Testis	male	GTEX-117YX	GTEX
GTEX-117YX-2126-SM-5GIEL	Spleen	Spleen	male	GTEX-117YX	GTEX
GTEX-117YX-2226-SM-5EGJJ	Adipose - Subcutaneous	Adipose Tissue	male	GTEX-117YX	GTEX
GTEX-117YX-2326-SM-5H12W	Skin - Sun Exposed (Lower leg)	Skin	male	GTEX-117YX	GTEX
GTEX-117YX-2426-SM-5GZZJ	Nerve - Tibial	Nerve	male	GTEX-117YX	GTEX
GTEX-117YX-2526-SM-5EQ4Q	Muscle - Skeletal	Muscle	male	GTEX-117YX	GTEX
GTEX-117YX-2626-SM-5EQ53	Artery - Tibial	Blood Vessel	male	GTEX-117YX	GTEX
GTEX-1192W-0005-SM-5NQBQ	Whole Blood	Blood	male	GTEX-1192W	GTEX
GTEX-1192W-0008-SM-5QGRE	Cells - Transformed fibroblasts	Skin	male	GTEX-1192W	GTEX
GTEX-1192W-0126-SM-5EGGS	Thyroid	Thyroid	male	GTEX-1192W	GTEX
GTEX-1192W-0226-SM-5EGGT	Heart - Atrial Appendage	Heart	male	GTEX-1192W	GTEX
GTEX-1192W-0826-SM-5EGHE	Esophagus - Gastroesophageal Junction	Esophagus	male	GTEX-1192W	GTEX
GTEX-1192W-2326-SM-5N9BS	Testis	Testis	male	GTEX-1192W	GTEX
GTEX-1192W-2626-SM-5Q5AF	Skin - Sun Exposed (Lower leg)	Skin	male	GTEX-1192W	GTEX
GTEX-1192W-3026-SM-5GZZV	Pituitary	Pituitary	male	GTEX-1192W	GTEX
GTEX-1192X-0005-SM-5NQC3	Whole Blood	Blood	male	GTEX-1192X	GTEX
GTEX-1192X-0008-SM-5Q5B7	Cells - Transformed fibroblasts	Skin	male	GTEX-1192X	GTEX
GTEX-1192X-0226-SM-5H12D	Skin - Sun Exposed (Lower leg)	Skin	male	GTEX-1192X	GTEX
GTEX-1192X-0326-SM-5H11U	Nerve - Tibial	Nerve	male	GTEX-1192X	GTEX
GTEX-1192X-0426-SM-5GIEE	Muscle - Skeletal	Muscle	male	GTEX-1192X	GTEX
GTEX-1192X-0726-SM-5987R	Heart - Atrial Appendage	Heart	male	GTEX-1192X	GTEX
GTEX-1192X-1026-SM-5H12P	Liver	Liver	male	GTEX-1192X	GTEX
GTEX-1192X-1126-SM-5EGGU	Thyroid	Thyroid	male	GTEX-1192X	GTEX
GTEX-1192X-1526-SM-5H11I	Adipose - Visceral (Omentum)	Adipose Tissue	male	GTEX-1192X	GTEX
GTEX-1192X-1826-SM-5GIE2	Esophagus - Gastroesophageal Junction	Esophagus	male	GTEX-1192X	GTEX
GTEX-1192X-2326-SM-5987X	Breast - Mammary Tissue	Breast	male	GTEX-1192X	GTEX
GTEX-1192X-2526-SM-59868	Small Intestine - Terminal Ileum	Small Intestine	male	GTEX-1192X	GTEX
GTEX-1192X-2726-SM-5N9DN	Skin - Not Sun Exposed (Suprapubic)	Skin	male	GTEX-1192X	GTEX
GTEX-1192X-2926-SM-5N9BA	Minor Salivary Gland	Salivary Gland	male	GTEX-1192X	GTEX
GTEX-1192X-3026-SM-5N9BM	Pituitary	Pituitary	male	GTEX-1192X	GTEX
GTEX-1192X-3126-SM-5N9BY	Brain - Cortex	Brain	male	GTEX-1192X	GTEX
GTEX-1192X-3226-SM-5987D	Brain - Cerebellum	Brain	male	GTEX-1192X	GTEX
GTEX-11DXW-0006-SM-5NQ7Y	Whole Blood	Blood	male	GTEX-11DXW	GTEX
GTEX-11DXW-0008-SM-5Q59V	Cells - Transformed fibroblasts	Skin	male	GTEX-11DXW	GTEX
GTEX-11DXW-0226-SM-5H122	Skin - Sun Exposed (Lower leg)	Skin	male	GTEX-11DXW	GTEX
GTEX-11DXW-0326-SM-5H11W	Adipose - Subcutaneous	Adipose Tissue	male	GTEX-11DXW	GTEX
GTEX-11DXW-0426-SM-5H12E	Nerve - Tibial	Nerve	male	GTEX-11DXW	GTEX
GTEX-11DXW-0526-SM-5H127	Artery - Tibial	Blood Vessel	male	GTEX-11DXW	GTEX
GTEX-11DXW-0626-SM-5N9ER	Breast - Mammary Tissue	Breast	male	GTEX-11DXW	GTEX
GTEX-11DXW-0726-SM-5H12J	Muscle - Skeletal	Muscle	male	GTEX-11DXW	GTEX
GTEX-11DXW-0826-SM-5H118	Skin - Not Sun Exposed (Suprapubic)	Skin	male	GTEX-11DXW	GTEX
GTEX-11DXW-1026-SM-5H11K	Brain - Cerebellum	Brain	male	GTEX-11DXW	GTEX
GTEX-11DXW-1126-SM-5H12Q	Brain - Cortex	Brain	male	GTEX-11DXW	GTEX
GTEX-11DXW-1226-SM-5H133	Pituitary	Pituitary	male	GTEX-11DXW	GTEX
GTEX-11DXX-0005-SM-5NQ8B	Whole Blood	Blood	female	GTEX-11DXX	GTEX
GTEX-11DXX-0008-SM-5Q5B8	Cells - Transformed fibroblasts	Skin	female	GTEX-11DXX	GTEX
GTEX-11DXX-0126-SM-5EGH7	Adrenal Gland	Adrenal Gland	female	GTEX-11DXX	GTEX
GTEX-11DXX-0226-SM-5P9HL	Thyroid	Thyroid	female	GTEX-11DXX	GTEX
GTEX-11DXX-0326-SM-5PNWC	Heart - Left Ventricle	Heart	female	GTEX-11DXX	GTEX
GTEX-11DXX-0426-SM-5EQ5F	Artery - Aorta	Blood Vessel	female	GTEX-11DXX	GTEX
GTEX-11DXX-0526-SM-5PNVR	Heart - Atrial Appendage	Heart	female	GTEX-11DXX	GTEX
GTEX-11DXX-0626-SM-5Q5AG	Lung	Lung	female	GTEX-11DXX	GTEX
GTEX-11DXX-0726-SM-5H12X	Spleen	Spleen	female	GTEX-11DXX	GTEX
GTEX-11DXX-0826-SM-5GZZP	Artery - Coronary	Blood Vessel	female	GTEX-11DXX	GTEX
GTEX-11DXX-0926-SM-5H112	Pancreas	Pancreas	female	GTEX-11DXX	GTEX
GTEX-11DXX-1026-SM-5H11E	Esophagus - Muscularis	Esophagus	female	GTEX-11DXX	GTEX
GTEX-11DXX-1126-SM-5GZZK	Esophagus - Mucosa	Esophagus	female	GTEX-11DXX	GTEX
GTEX-11DXX-1226-SM-5GICD	Esophagus - Gastroesophageal Junction	Esophagus	female	GTEX-11DXX	GTEX
GTEX-11DXX-1326-SM-5GIDZ	Stomach	Stomach	female	GTEX-11DXX	GTEX
GTEX-11DXX-1426-SM-5GIDU	Ovary	Ovary	female	GTEX-11DXX	GTEX
GTEX-11DXX-1526-SM-5H115	Uterus	Uterus	female	GTEX-11DXX	GTEX
GTEX-11DXX-1626-SM-5H11H	Small Intestine - Terminal Ileum	Small Intestine	female	GTEX-11DXX	GTEX
GTEX-11DXX-1726-SM-5H11T	Vagina	Vagina	female	GTEX-11DXX	GTEX
GTEX-11DXX-1826-SM-5H126	Colon - Transverse	Colon	female	GTEX-11DXX	GTEX
GTEX-11DXX-1926-SM-5EGJK	Colon - Sigmoid	Colon	female	GTEX-11DXX	GTEX
GTEX-11DXX-2026-SM-5EGJL	Adipose - Visceral (Omentum)	Adipose Tissue	female	GTEX-11DXX	GTEX
GTEX-11DXX-2126-SM-5PNYR	Skin - Not Sun Exposed (Suprapubic)	Skin	female	GTEX-11DXX	GTEX
GTEX-11DXX-2326-SM-5Q5A2	Adipose - Subcutaneous	Adipose Tissue	female	GTEX-11DXX	GTEX
GTEX-11DXX-2426-SM-5GZZW	Skin - Sun Exposed (Lower leg)	Skin	female	GTEX-11DXX	GTEX
GTEX-11DXX-2526-SM-5H119	Nerve - Tibial	Nerve	female	GTEX-11DXX	GTEX
GTEX-11DXX-2626-SM-5Q5A3	Artery - Tibial	Blood Vessel	female	GTEX-11DXX	GTEX
GTEX-11DXX-2726-SM-5PNXO	Muscle - Skeletal	Muscle	female	GTEX-11DXX	GTEX
GTEX-11DXY-0006-SM-5NQ8N	Whole Blood	Blood	male	GTEX-11DXY	GTEX
GTEX-11DXY-0008-SM-5QGR4	Cells - Transformed fibroblasts	Skin	male	GTEX-11DXY	GTEX
GTEX-11DXY-0126-SM-5H11Q	Skin - Not Sun Exposed (Suprapubic)	Skin	male	GTEX-11DXY	GTEX
GTEX-11DXY-0226-SM-5H123	Testis	Testis	male	GTEX-11DXY	GTEX
GTEX-11DXY-0326-SM-5H12F	Adipose - Visceral (Omentum)	Adipose Tissue	male	GTEX-11DXY	GTEX
GTEX-11DXY-0426-SM-5H12R	Thyroid	Thyroid	male	GTEX-11DXY	GTEX
GTEX-11DXY-0526-SM-5EGGQ	Liver	Liver	male	GTEX-11DXY	GTEX
GTEX-11DXY-0826-SM-5EGGR	Heart - Left Ventricle	Heart	male	GTEX-11DXY	GTEX
GTEX-11DXY-1026-SM-5987V	Heart - Atrial Appendage	Heart	male	GTEX-11DXY	GTEX
GTEX-11DXY-1126-SM-5987W	Artery - Coronary	Blood Vessel	male	GTEX-11DXY	GTEX
GTEX-11DXY-1326-SM-5987Z	Esophagus - Gastroesophageal Junction	Esophagus	male	GTEX-11DXY	GTEX
GTEX-11DXY-1426-SM-5N9CN	Esophagus - Mucosa	Esophagus	male	GTEX-11DXY	GTEX
GTEX-11DXY-1526-SM-5H129	Esophagus - Muscularis	Esophagus	male	GTEX-11DXY	GTEX
GTEX-11DXY-1626-SM-5H12L	Adrenal Gland	Adrenal Gland	male	GTEX-11DXY	GTEX
GTEX-11DXY-2026-SM-5N9CZ	Colon - Sigmoid	Colon	male	GTEX-11DXY	GTEX
GTEX-11DXY-2326-SM-5GICW	Breast - Mammary Tissue	Breast	male	GTEX-11DXY	GTEX
GTEX-11DXY-2626-SM-5GIE7	Skin - Sun Exposed (Lower leg)	Skin	male	GTEX-11DXY	GTEX
GTEX-11DXY-2726-SM-5GID2	Muscle - Skeletal	Muscle	male	GTEX-11DXY	GTEX
GTEX-11DXY-3026-SM-5N9CB	Pituitary	Pituitary	male	GTEX-11DXY	GTEX
GTEX-11DXY-3126-SM-5N9BT	Brain - Cerebellum	Brain	male	GTEX-11DXY	GTEX
GTEX-11DXY-3226-SM-5GIDE	Brain - Cortex	Brain	male	GTEX-11DXY	GTEX
GTEX-11DXZ-0006-SM-5LZZH	Whole Blood	Blood	male	GTEX-11DXZ	GTEX
GTEX-11DXZ-0126-SM-5EGGY	Liver	Liver	male	GTEX-11DXZ	GTEX
GTEX-11DXZ-0226-SM-5EGGZ	Adrenal Gland	Adrenal Gland	male	GTEX-11DXZ	GTEX
GTEX-11DXZ-0326-SM-5EGH1	Heart - Atrial Appendage	Heart	male	GTEX-11DXZ	GTEX
GTEX-11DXZ-0426-SM-5987Y	Artery - Aorta	Blood Vessel	male	GTEX-11DXZ	GTEX
GTEX-11DXZ-0526-SM-5GU7J	Artery - Coronary	Blood Vessel	male	GTEX-11DXZ	GTEX
GTEX-11DXZ-0626-SM-5GU77	Heart - Left Ventricle	Heart	male	GTEX-11DXZ	GTEX
GTEX-11DXZ-0726-SM-5N9C4	Lung	Lung	male	GTEX-11DXZ	GTEX
GTEX-11DXZ-0926-SM-5N9CG	Thyroid	Thyroid	male	GTEX-11DXZ	GTEX
GTEX-11DXZ-1026-SM-5N9D5	Esophagus - Gastroesophageal Junction	Esophagus	male	GTEX-11DXZ	GTEX
GTEX-11DXZ-1226-SM-5H11L	Esophagus - Mucosa	Esophagus	male	GTEX-11DXZ	GTEX
GTEX-11DXZ-1326-SM-5H11X	Small Intestine - Terminal Ileum	Small Intestine	male	GTEX-11DXZ	GTEX
GTEX-11DXZ-1426-SM-5H12A	Adipose - Visceral (Omentum)	Adipose Tissue	male	GTEX-11DXZ	GTEX
GTEX-11DXZ-1626-SM-5GIDI	Colon - Sigmoid	Colon	male	GTEX-11DXZ	GTEX
GTEX-11DXZ-1726-SM-5H12M	Colon - Transverse	Colon	male	GTEX-11DXZ	GTEX
GTEX-11DXZ-1826-SM-5H12Y	Prostate	Prostate	male	GTEX-11DXZ	GTEX
GTEX-11DXZ-1926-SM-5GZZL	Breast - Mammary Tissue	Breast	male	GTEX-11DXZ	GTEX
GTEX-11DXZ-2026-SM-5987S	Skin - Not Sun Exposed (Suprapubic)	Skin	male	GTEX-11DXZ	GTEX
GTEX-11DXZ-2126-SM-59881	Testis	Testis	male	GTEX-11DXZ	GTEX
GTEX-11DXZ-2226-SM-5EGH2	Adipose - Subcutaneous	Adipose Tissue	male	GTEX-11DXZ	GTEX
GTEX-11DXZ-2326-SM-5EGGV	Skin - Sun Exposed (Lower leg)	Skin	male	GTEX-11DXZ	GTEX
GTEX-11DXZ-2426-SM-5N9DT	Muscle - Skeletal	Muscle	male	GTEX-11DXZ	GTEX
GTEX-11DXZ-2526-SM-5N9BG	Nerve - Tibial	Nerve	male	GTEX-11DXZ	GTEX
GTEX-11DXZ-2626-SM-59882	Artery - Tibial	Blood Vessel	male	GTEX-11DXZ	GTEX
GTEX-11DYG-0006-SM-5NQB2	Whole Blood	Blood	male	GTEX-11DYG	GTEX
GTEX-11DYG-0008-SM-5QGR5	Cells - Transformed fibroblasts	Skin	male	GTEX-11DYG	GTEX
GTEX-11DYG-0126-SM-59883	Skin - Sun Exposed (Lower leg)	Skin	male	GTEX-11DYG	GTEX
GTEX-11DYG-0426-SM-5987J	Nerve - Tibial	Nerve	male	GTEX-11DYG	GTEX
GTEX-11DYG-0826-SM-5N9GH	Thyroid	Thyroid	male	GTEX-11DYG	GTEX
GTEX-11DYG-0926-SM-5EGGW	Artery - Coronary	Blood Vessel	male	GTEX-11DYG	GTEX
GTEX-11DYG-1026-SM-5A5JQ	Heart - Atrial Appendage	Heart	male	GTEX-11DYG	GTEX
GTEX-11DYG-1226-SM-5N9DC	Artery - Aorta	Blood Vessel	male	GTEX-11DYG	GTEX
GTEX-11DYG-1326-SM-5N9DO	Esophagus - Mucosa	Esophagus	male	GTEX-11DYG	GTEX
GTEX-11DYG-1426-SM-5A5JR	Esophagus - Muscularis	Esophagus	male	GTEX-11DYG	GTEX
GTEX-11DYG-1526-SM-5A5JS	Skin - Not Sun Exposed (Suprapubic)	Skin	male	GTEX-11DYG	GTEX
GTEX-11DYG-1926-SM-5H12I	Esophagus - Gastroesophageal Junction	Esophagus	male	GTEX-11DYG	GTEX
GTEX-11DYG-2026-SM-5EGGX	Adipose - Visceral (Omentum)	Adipose Tissue	male	GTEX-11DYG	GTEX
GTEX-11DYG-2526-SM-5N9BB	Prostate	Prostate	male	GTEX-11DYG	GTEX
GTEX-11DYG-2926-SM-5H132	Brain - Cerebellum	Brain	male	GTEX-11DYG	GTEX
GTEX-11DYG-3126-SM-5A5L6	Pituitary	Pituitary	male	GTEX-11DYG	GTEX
GTEX-11DZ1-0008-SM-5QGR3	Cells - Transformed fibroblasts	Skin	male	GTEX-11DZ1	GTEX
GTEX-11DZ1-0126-SM-5985Q	Skin - Sun Exposed (Lower leg)	Skin	male	GTEX-11DZ1	GTEX
GTEX-11DZ1-0226-SM-5A5KF	Adipose - Subcutaneous	Adipose Tissue	male	GTEX-11DZ1	GTEX
GTEX-11DZ1-0326-SM-5N9BN	Breast - Mammary Tissue	Breast	male	GTEX-11DZ1	GTEX
GTEX-11DZ1-0426-SM-5H11A	Lung	Lung	male	GTEX-11DZ1	GTEX
GTEX-11DZ1-0926-SM-5EQ5R	Muscle - Skeletal	Muscle	male	GTEX-11DZ1	GTEX
GTEX-11DZ1-2026-SM-5A5KG	Esophagus - Mucosa	Esophagus	male	GTEX-11DZ1	GTEX
GTEX-11DZ1-2426-SM-5GZZX	Skin - Not Sun Exposed (Suprapubic)	Skin	male	GTEX-11DZ1	GTEX
GTEX-11DZ1-2726-SM-5A5KH	Thyroid	Thyroid	male	GTEX-11DZ1	GTEX
GTEX-11DZ1-2926-SM-5A5KI	Brain - Cerebellum	Brain	male	GTEX-11DZ1	GTEX
GTEX-11EI6-0005-SM-5N9GN	Whole Blood	Blood	male	GTEX-11EI6	GTEX
GTEX-11EI6-0008-SM-5QGR7	Cells - Transformed fibroblasts	Skin	male	GTEX-11EI6	GTEX
GTEX-11EI6-0126-SM-5985R	Skin - Sun Exposed (Lower leg)	Skin	male	GTEX-11EI6	GTEX
GTEX-11EI6-0226-SM-5EQ64	Adipose - Subcutaneous	Adipose Tissue	male	GTEX-11EI6	GTEX
GTEX-11EI6-0326-SM-5EQ6G	Muscle - Skeletal	Muscle	male	GTEX-11EI6	GTEX
GTEX-11EI6-0426-SM-5EQ43	Nerve - Tibial	Nerve	male	GTEX-11EI6	GTEX
GTEX-11EI6-0526-SM-5985S	Artery - Tibial	Blood Vessel	male	GTEX-11EI6	GTEX
GTEX-11EI6-0626-SM-5985T	Breast - Mammary Tissue	Breast	male	GTEX-11EI6	GTEX
GTEX-11EI6-0726-SM-59866	Thyroid	Thyroid	male	GTEX-11EI6	GTEX
GTEX-11EI6-0826-SM-5985V	Lung	Lung	male	GTEX-11EI6	GTEX
GTEX-11EI6-1526-SM-5P9GL	Esophagus - Mucosa	Esophagus	male	GTEX-11EI6	GTEX
GTEX-11EI6-2226-SM-5EGJM	Testis	Testis	male	GTEX-11EI6	GTEX
GTEX-11EI6-2426-SM-5PNVS	Stomach	Stomach	male	GTEX-11EI6	GTEX
GTEX-11EI6-2626-SM-5PNVT	Colon - Sigmoid	Colon	male	GTEX-11EI6	GTEX
GTEX-11EI6-2826-SM-5H11D	Skin - Not Sun Exposed (Suprapubic)	Skin	male	GTEX-11EI6	GTEX
GTEX-11EI6-2926-SM-5985U	Brain - Cerebellum	Brain	male	GTEX-11EI6	GTEX
GTEX-11EI6-3026-SM-5GZZO	Brain - Cortex	Brain	male	GTEX-11EI6	GTEX
GTEX-11EI6-3126-SM-5H111	Pituitary	Pituitary	male	GTEX-11EI6	GTEX
GTEX-11EM3-0001-SM-5Q5BD	Cells - EBV-transformed lymphocytes	Blood	female	GTEX-11EM3	GTEX
GTEX-11EM3-0005-SM-5N9DK	Whole Blood	Blood	female	GTEX-11EM3	GTEX
GTEX-11EM3-0126-SM-5985K	Thyroid	Thyroid	female	GTEX-11EM3	GTEX
GTEX-11EM3-0226-SM-5985Y	Artery - Aorta	Blood Vessel	female	GTEX-11EM3	GTEX
GTEX-11EM3-0326-SM-5A5KJ	Adrenal Gland	Adrenal Gland	female	GTEX-11EM3	GTEX
GTEX-11EM3-0426-SM-5N9BZ	Heart - Atrial Appendage	Heart	female	GTEX-11EM3	GTEX
GTEX-11EM3-0526-SM-5H12N	Artery - Coronary	Blood Vessel	female	GTEX-11EM3	GTEX
GTEX-11EM3-0626-SM-5H12Z	Heart - Left Ventricle	Heart	female	GTEX-11EM3	GTEX
GTEX-11EM3-0726-SM-5GZZM	Esophagus - Muscularis	Esophagus	female	GTEX-11EM3	GTEX
GTEX-11EM3-0826-SM-5N9CC	Esophagus - Mucosa	Esophagus	female	GTEX-11EM3	GTEX
GTEX-11EM3-0926-SM-5A5KK	Esophagus - Gastroesophageal Junction	Esophagus	female	GTEX-11EM3	GTEX
GTEX-11EM3-1026-SM-5A5KL	Stomach	Stomach	female	GTEX-11EM3	GTEX
GTEX-11EM3-1126-SM-5A5KM	Adipose - Visceral (Omentum)	Adipose Tissue	female	GTEX-11EM3	GTEX
GTEX-11EM3-1226-SM-5N9DD	Skin - Not Sun Exposed (Suprapubic)	Skin	female	GTEX-11EM3	GTEX
GTEX-11EM3-1326-SM-5N9C6	Breast - Mammary Tissue	Breast	female	GTEX-11EM3	GTEX
GTEX-11EM3-1526-SM-5A5KN	Colon - Transverse	Colon	female	GTEX-11EM3	GTEX
GTEX-11EM3-1626-SM-5N9CO	Colon - Sigmoid	Colon	female	GTEX-11EM3	GTEX
GTEX-11EM3-1726-SM-5N9D1	Ovary	Ovary	female	GTEX-11EM3	GTEX
GTEX-11EM3-1826-SM-5A5KO	Vagina	Vagina	female	GTEX-11EM3	GTEX
GTEX-11EM3-1926-SM-5987U	Uterus	Uterus	female	GTEX-11EM3	GTEX
GTEX-11EM3-2126-SM-5H11M	Muscle - Skeletal	Muscle	female	GTEX-11EM3	GTEX
GTEX-11EM3-2226-SM-5H11Y	Artery - Tibial	Blood Vessel	female	GTEX-11EM3	GTEX
GTEX-11EM3-2326-SM-5H12B	Adipose - Subcutaneous	Adipose Tissue	female	GTEX-11EM3	GTEX
GTEX-11EM3-2426-SM-59861	Skin - Sun Exposed (Lower leg)	Skin	female	GTEX-11EM3	GTEX
GTEX-11EMC-0002-SM-5Q5DO	Cells - EBV-transformed lymphocytes	Blood	female	GTEX-11EMC	GTEX
GTEX-11EMC-0006-SM-5O9DN	Whole Blood	Blood	female	GTEX-11EMC	GTEX
GTEX-11EMC-0008-SM-5Q5DR	Cells - Transformed fibroblasts	Skin	female	GTEX-11EMC	GTEX
GTEX-11EMC-0126-SM-5EGKV	Lung	Lung	female	GTEX-11EMC	GTEX
GTEX-11EMC-0226-SM-5EGLP	Thyroid	Thyroid	female	GTEX-11EMC	GTEX
GTEX-11EMC-0526-SM-5EGJN	Adrenal Gland	Adrenal Gland	female	GTEX-11EMC	GTEX
GTEX-11EMC-0726-SM-5EGJO	Heart - Left Ventricle	Heart	female	GTEX-11EMC	GTEX
GTEX-11EMC-0826-SM-59862	Heart - Atrial Appendage	Heart	female	GTEX-11EMC	GTEX
GTEX-11EMC-0926-SM-59863	Artery - Aorta	Blood Vessel	female	GTEX-11EMC	GTEX
GTEX-11EMC-1426-SM-5N9E4	Colon - Sigmoid	Colon	female	GTEX-11EMC	GTEX
GTEX-11EMC-1726-SM-5H11P	Ovary	Ovary	female	GTEX-11EMC	GTEX
GTEX-11EMC-1826-SM-5A5JT	Uterus	Uterus	female	GTEX-11EMC	GTEX
GTEX-11EMC-1926-SM-5A5JU	Vagina	Vagina	female	GTEX-11EMC	GTEX
GTEX-11EMC-2026-SM-5A5JV	Breast - Mammary Tissue	Breast	female	GTEX-11EMC	GTEX
GTEX-11EMC-2226-SM-5A5JW	Esophagus - Mucosa	Esophagus	female	GTEX-11EMC	GTEX
GTEX-11EMC-2526-SM-5PNVU	Minor Salivary Gland	Salivary Gland	female	GTEX-11EMC	GTEX
GTEX-11EMC-2626-SM-59864	Muscle - Skeletal	Muscle	female	GTEX-11EMC	GTEX
GTEX-11EMC-2826-SM-5PNY6	Adipose - Subcutaneous	Adipose Tissue	female	GTEX-11EMC	GTEX
GTEX-11EMC-2926-SM-5EQ4F	Skin - Sun Exposed (Lower leg)	Skin	female	GTEX-11EMC	GTEX
GTEX-11EMC-3026-SM-5EQ4R	Artery - Tibial	Blood Vessel	female	GTEX-11EMC	GTEX
GTEX-11EMC-3126-SM-5EGJP	Pituitary	Pituitary	female	GTEX-11EMC	GTEX
GTEX-11EMC-3226-SM-5EGKW	Brain - Cortex	Brain	female	GTEX-11EMC	GTEX
GTEX-11EMC-3326-SM-5P9JH	Brain - Cerebellum	Brain	female	GTEX-11EMC	GTEX
GTEX-11EQ8-0006-SM-5P9HJ	Whole Blood	Blood	male	GTEX-11EQ8	GTEX
GTEX-11EQ8-0008-SM-5Q5DJ	Cells - Transformed fibroblasts	Skin	male	GTEX-11EQ8	GTEX
GTEX-11EQ8-0126-SM-5EQ54	Skin - Sun Exposed (Lower leg)	Skin	male	GTEX-11EQ8	GTEX
GTEX-11EQ8-0226-SM-5EQ5G	Adipose - Subcutaneous	Adipose Tissue	male	GTEX-11EQ8	GTEX
GTEX-11EQ8-0426-SM-5N9DP	Artery - Tibial	Blood Vessel	male	GTEX-11EQ8	GTEX
GTEX-11EQ8-0526-SM-5N9BC	Muscle - Skeletal	Muscle	male	GTEX-11EQ8	GTEX
GTEX-11EQ8-0826-SM-5N9FG	Thyroid	Thyroid	male	GTEX-11EQ8	GTEX
GTEX-11EQ8-0926-SM-5H12V	Skin - Not Sun Exposed (Suprapubic)	Skin	male	GTEX-11EQ8	GTEX
GTEX-11EQ8-1326-SM-5EGJQ	Heart - Atrial Appendage	Heart	male	GTEX-11EQ8	GTEX
GTEX-11EQ8-1426-SM-5EGJR	Testis	Testis	male	GTEX-11EQ8	GTEX
GTEX-11EQ8-2626-SM-5N9BO	Colon - Sigmoid	Colon	male	GTEX-11EQ8	GTEX
GTEX-11EQ8-2826-SM-5N9C1	Brain - Cerebellum	Brain	male	GTEX-11EQ8	GTEX
GTEX-11EQ9-0002-SM-5QGQ1	Cells - EBV-transformed lymphocytes	Blood	male	GTEX-11EQ9	GTEX
GTEX-11EQ9-0006-SM-5LUB6	Whole Blood	Blood	male	GTEX-11EQ9	GTEX
GTEX-11EQ9-0008-SM-5Q5DK	Cells - Transformed fibroblasts	Skin	male	GTEX-11EQ9	GTEX
GTEX-11EQ9-0126-SM-5986I	Adrenal Gland	Adrenal Gland	male	GTEX-11EQ9	GTEX
GTEX-11EQ9-0226-SM-5A5JX	Lung	Lung	male	GTEX-11EQ9	GTEX
GTEX-11EQ9-0426-SM-5A5JY	Spleen	Spleen	male	GTEX-11EQ9	GTEX
GTEX-11EQ9-0526-SM-5A5JZ	Liver	Liver	male	GTEX-11EQ9	GTEX
GTEX-11EQ9-0626-SM-5A5K1	Thyroid	Thyroid	male	GTEX-11EQ9	GTEX
GTEX-11EQ9-0726-SM-5A5K2	Esophagus - Mucosa	Esophagus	male	GTEX-11EQ9	GTEX
GTEX-11EQ9-0826-SM-5986Y	Esophagus - Muscularis	Esophagus	male	GTEX-11EQ9	GTEX
GTEX-11EQ9-0926-SM-5HL6I	Esophagus - Gastroesophageal Junction	Esophagus	male	GTEX-11EQ9	GTEX
GTEX-11EQ9-1026-SM-5H134	Pancreas	Pancreas	male	GTEX-11EQ9	GTEX
GTEX-11EQ9-1126-SM-5987I	Adipose - Visceral (Omentum)	Adipose Tissue	male	GTEX-11EQ9	GTEX
GTEX-11EQ9-1226-SM-5987E	Stomach	Stomach	male	GTEX-11EQ9	GTEX
GTEX-11EQ9-1326-SM-5985X	Small Intestine - Terminal Ileum	Small Intestine	male	GTEX-11EQ9	GTEX
GTEX-11EQ9-1426-SM-5987G	Colon - Transverse	Colon	male	GTEX-11EQ9	GTEX
GTEX-11EQ9-1526-SM-5PNY7	Colon - Sigmoid	Colon	male	GTEX-11EQ9	GTEX
GTEX-11EQ9-1626-SM-5PNY8	Skin - Not Sun Exposed (Suprapubic)	Skin	male	GTEX-11EQ9	GTEX
GTEX-11EQ9-1726-SM-5HL6U	Prostate	Prostate	male	GTEX-11EQ9	GTEX
GTEX-11EQ9-1826-SM-5Q5AJ	Breast - Mammary Tissue	Breast	male	GTEX-11EQ9	GTEX
GTEX-11EQ9-1926-SM-5PNVV	Testis	Testis	male	GTEX-11EQ9	GTEX
GTEX-11EQ9-2026-SM-5P9JI	Minor Salivary Gland	Salivary Gland	male	GTEX-11EQ9	GTEX
GTEX-11EQ9-2126-SM-5PNVW	Muscle - Skeletal	Muscle	male	GTEX-11EQ9	GTEX
GTEX-11EQ9-2226-SM-5987H	Artery - Tibial	Blood Vessel	male	GTEX-11EQ9	GTEX
GTEX-11EQ9-2326-SM-5HL5H	Nerve - Tibial	Nerve	male	GTEX-11EQ9	GTEX
GTEX-11EQ9-2426-SM-5HL5T	Skin - Sun Exposed (Lower leg)	Skin	male	GTEX-11EQ9	GTEX
GTEX-11EQ9-2526-SM-5HL66	Adipose - Subcutaneous	Adipose Tissue	male	GTEX-11EQ9	GTEX
GTEX-11GS4-0006-SM-5SI9M	Whole Blood	Blood	male	GTEX-11GS4	GTEX
GTEX-11GS4-0008-SM-5QGRA	Cells - Transformed fibroblasts	Skin	male	GTEX-11GS4	GTEX
GTEX-11GS4-0226-SM-5HL77	Skin - Not Sun Exposed (Suprapubic)	Skin	male	GTEX-11GS4	GTEX
GTEX-11GS4-0326-SM-5N9F7	Artery - Aorta	Blood Vessel	male	GTEX-11GS4	GTEX
GTEX-11GS4-0426-SM-5N9CD	Heart - Atrial Appendage	Heart	male	GTEX-11GS4	GTEX
GTEX-11GS4-0526-SM-5A5KQ	Heart - Left Ventricle	Heart	male	GTEX-11GS4	GTEX
GTEX-11GS4-0626-SM-5A5LC	Artery - Coronary	Blood Vessel	male	GTEX-11GS4	GTEX
GTEX-11GS4-0826-SM-5986J	Thyroid	Thyroid	male	GTEX-11GS4	GTEX
GTEX-11GS4-1026-SM-5N9DE	Adipose - Visceral (Omentum)	Adipose Tissue	male	GTEX-11GS4	GTEX
GTEX-11GS4-1426-SM-5N9D2	Esophagus - Muscularis	Esophagus	male	GTEX-11GS4	GTEX
GTEX-11GS4-1826-SM-5HL4T	Colon - Sigmoid	Colon	male	GTEX-11GS4	GTEX
GTEX-11GS4-2026-SM-5N9CP	Testis	Testis	male	GTEX-11GS4	GTEX
GTEX-11GS4-2126-SM-5A5KR	Breast - Mammary Tissue	Breast	male	GTEX-11GS4	GTEX
GTEX-11GS4-2326-SM-5A5KS	Kidney - Cortex	Kidney	male	GTEX-11GS4	GTEX
GTEX-11GS4-2526-SM-5A5KT	Muscle - Skeletal	Muscle	male	GTEX-11GS4	GTEX
GTEX-11GS4-2626-SM-5A5LD	Adipose - Subcutaneous	Adipose Tissue	male	GTEX-11GS4	GTEX
GTEX-11GS4-2726-SM-5A5LE	Skin - Sun Exposed (Lower leg)	Skin	male	GTEX-11GS4	GTEX
GTEX-11GS4-2826-SM-5HL56	Nerve - Tibial	Nerve	male	GTEX-11GS4	GTEX
GTEX-11GS4-2926-SM-5A5LF	Artery - Tibial	Blood Vessel	male	GTEX-11GS4	GTEX
GTEX-11GS4-3026-SM-5A5LG	Pituitary	Pituitary	male	GTEX-11GS4	GTEX
GTEX-11GS4-3126-SM-5A5LH	Brain - Cortex	Brain	male	GTEX-11GS4	GTEX
GTEX-11GSO-0005-SM-5O9CA	Whole Blood	Blood	male	GTEX-11GSO	GTEX
GTEX-11GSO-0011-R1b-SM-57WD3	Brain - Hippocampus	Brain	male	GTEX-11GSO	GTEX
GTEX-11GSO-0011-R2a-SM-57WDF	Brain - Substantia nigra	Brain	male	GTEX-11GSO	GTEX
GTEX-11GSO-0011-R3b-SM-57WB2	Brain - Anterior cingulate cortex (BA24)	Brain	male	GTEX-11GSO	GTEX
GTEX-11GSO-0226-SM-5A5LV	Adipose - Visceral (Omentum)	Adipose Tissue	male	GTEX-11GSO	GTEX
GTEX-11GSO-0626-SM-5A5LW	Thyroid	Thyroid	male	GTEX-11GSO	GTEX
GTEX-11GSO-1926-SM-5A5K3	Breast - Mammary Tissue	Breast	male	GTEX-11GSO	GTEX
GTEX-11GSO-2326-SM-5A5LX	Adipose - Subcutaneous	Adipose Tissue	male	GTEX-11GSO	GTEX
GTEX-11GSO-2426-SM-5A5LY	Skin - Sun Exposed (Lower leg)	Skin	male	GTEX-11GSO	GTEX
GTEX-11GSO-2526-SM-5PNVX	Muscle - Skeletal	Muscle	male	GTEX-11GSO	GTEX
GTEX-11GSO-2626-SM-5Q5AK	Nerve - Tibial	Nerve	male	GTEX-11GSO	GTEX
GTEX-11GSO-2826-SM-5HL6Q	Pituitary	Pituitary	male	GTEX-11GSO	GTEX
GTEX-11GSO-2926-SM-5HL73	Brain - Cortex	Brain	male	GTEX-11GSO	GTEX
GTEX-11GSO-3026-SM-5Q5AL	Brain - Cerebellum	Brain	male	GTEX-11GSO	GTEX
GTEX-11GSP-0006-SM-5N9EL	Whole Blood	Blood	female	GTEX-11GSP	GTEX
GTEX-11GSP-0008-SM-5Q5DM	Cells - Transformed fibroblasts	Skin	female	GTEX-11GSP	GTEX
GTEX-11GSP-0011-R10a-SM-5NQ7J	Brain - Frontal Cortex (BA9)	Brain	female	GTEX-11GSP	GTEX
GTEX-11GSP-0011-R11b-SM-5NQ7V	Brain - Cerebellar Hemisphere	Brain	female	GTEX-11GSP	GTEX
GTEX-11GSP-0011-R5a-SM-57WBE	Brain - Caudate (basal ganglia)	Brain	female	GTEX-11GSP	GTEX
GTEX-11GSP-0011-R6b-SM-57WBQ	Brain - Nucleus accumbens (basal ganglia)	Brain	female	GTEX-11GSP	GTEX
GTEX-11GSP-0011-R7b-SM-57WC3	Brain - Putamen (basal ganglia)	Brain	female	GTEX-11GSP	GTEX
GTEX-11GSP-0011-R8b-SM-5NQ79	Brain - Hypothalamus	Brain	female	GTEX-11GSP	GTEX
GTEX-11GSP-0011-R9b-SM-5NQ77	Brain - Spinal cord (cervical c-1)	Brain	female	GTEX-11GSP	GTEX
GTEX-11GSP-0126-SM-5A5KU	Thyroid	Thyroid	female	GTEX-11GSP	GTEX
GTEX-11GSP-0226-SM-5A5KV	Ovary	Ovary	female	GTEX-11GSP	GTEX
GTEX-11GSP-0326-SM-5A5KW	Adrenal Gland	Adrenal Gland	female	GTEX-11GSP	GTEX
GTEX-11GSP-0426-SM-5A5KX	Pancreas	Pancreas	female	GTEX-11GSP	GTEX
GTEX-11GSP-0626-SM-5986T	Liver	Liver	female	GTEX-11GSP	GTEX
GTEX-11GSP-0726-SM-5986L	Lung	Lung	female	GTEX-11GSP	GTEX
GTEX-11GSP-1126-SM-5A5LM	Artery - Aorta	Blood Vessel	female	GTEX-11GSP	GTEX
GTEX-11GSP-1226-SM-5985M	Heart - Atrial Appendage	Heart	female	GTEX-11GSP	GTEX
GTEX-11GSP-1326-SM-5A5KY	Heart - Left Ventricle	Heart	female	GTEX-11GSP	GTEX
GTEX-11GSP-1626-SM-5986N	Colon - Transverse	Colon	female	GTEX-11GSP	GTEX
GTEX-11GSP-1726-SM-5A5LI	Esophagus - Muscularis	Esophagus	female	GTEX-11GSP	GTEX
GTEX-11GSP-1826-SM-5N9DQ	Esophagus - Mucosa	Esophagus	female	GTEX-11GSP	GTEX
GTEX-11GSP-2126-SM-5HL5E	Stomach	Stomach	female	GTEX-11GSP	GTEX
GTEX-11GSP-2226-SM-5HL5Q	Vagina	Vagina	female	GTEX-11GSP	GTEX
GTEX-11GSP-2326-SM-5HL63	Skin - Not Sun Exposed (Suprapubic)	Skin	female	GTEX-11GSP	GTEX
GTEX-11GSP-2426-SM-5N9BD	Uterus	Uterus	female	GTEX-11GSP	GTEX
GTEX-11GSP-2526-SM-5N9BP	Skin - Sun Exposed (Lower leg)	Skin	female	GTEX-11GSP	GTEX
GTEX-11GSP-2726-SM-5A5LJ	Muscle - Skeletal	Muscle	female	GTEX-11GSP	GTEX
GTEX-11GSP-2826-SM-5A5LK	Nerve - Tibial	Nerve	female	GTEX-11GSP	GTEX
GTEX-11GSP-2926-SM-5N9C2	Artery - Tibial	Blood Vessel	female	GTEX-11GSP	GTEX
GTEX-11GSP-3026-SM-5N9CE	Pituitary	Pituitary	female	GTEX-11GSP	GTEX
GTEX-11GSP-3126-SM-5A5LL	Brain - Cerebellum	Brain	female	GTEX-11GSP	GTEX
GTEX-11GSP-3226-SM-5986O	Brain - Cortex	Brain	female	GTEX-11GSP	GTEX
GTEX-11H98-0008-SM-5QGR8	Cells - Transformed fibroblasts	Skin	male	GTEX-11H98	GTEX
GTEX-11H98-0011-R10b-SM-5NQ98	Brain - Frontal Cortex (BA9)	Brain	male	GTEX-11H98	GTEX
GTEX-11H98-0011-R11b-SM-5NQ6U	Brain - Cerebellar Hemisphere	Brain	male	GTEX-11H98	GTEX
GTEX-11H98-0011-R5b-SM-57WCF	Brain - Caudate (basal ganglia)	Brain	male	GTEX-11H98	GTEX
GTEX-11H98-0011-R8a-SM-5NQ8V	Brain - Hypothalamus	Brain	male	GTEX-11H98	GTEX
GTEX-11H98-0126-SM-5EGHG	Skin - Sun Exposed (Lower leg)	Skin	male	GTEX-11H98	GTEX
GTEX-11H98-0226-SM-5NQ89	Adipose - Subcutaneous	Adipose Tissue	male	GTEX-11H98	GTEX
GTEX-11H98-0326-SM-5HL4S	Muscle - Skeletal	Muscle	male	GTEX-11H98	GTEX
GTEX-11H98-0426-SM-5HL55	Nerve - Tibial	Nerve	male	GTEX-11H98	GTEX
GTEX-11I78-0001-SM-5Q5BE	Cells - EBV-transformed lymphocytes	Blood	female	GTEX-11I78	GTEX
GTEX-11I78-0005-SM-5N9GB	Whole Blood	Blood	female	GTEX-11I78	GTEX
GTEX-11I78-0008-SM-5Q5DI	Cells - Transformed fibroblasts	Skin	female	GTEX-11I78	GTEX
GTEX-11I78-0126-SM-5HL6F	Lung	Lung	female	GTEX-11I78	GTEX
GTEX-11I78-0226-SM-5HL6R	Adipose - Visceral (Omentum)	Adipose Tissue	female	GTEX-11I78	GTEX
GTEX-11I78-0526-SM-5986A	Thyroid	Thyroid	female	GTEX-11I78	GTEX
GTEX-11I78-0626-SM-5A5LZ	Pancreas	Pancreas	female	GTEX-11I78	GTEX
GTEX-11I78-0726-SM-5A5M1	Artery - Aorta	Blood Vessel	female	GTEX-11I78	GTEX
GTEX-11I78-0826-SM-5A5K4	Heart - Left Ventricle	Heart	female	GTEX-11I78	GTEX
GTEX-11I78-1026-SM-5HL74	Artery - Coronary	Blood Vessel	female	GTEX-11I78	GTEX
GTEX-11I78-1126-SM-5A5K5	Small Intestine - Terminal Ileum	Small Intestine	female	GTEX-11I78	GTEX
GTEX-11I78-1226-SM-5A5K6	Colon - Transverse	Colon	female	GTEX-11I78	GTEX
GTEX-11I78-1326-SM-5PNY9	Colon - Sigmoid	Colon	female	GTEX-11I78	GTEX
GTEX-11I78-1426-SM-5PNVY	Esophagus - Muscularis	Esophagus	female	GTEX-11I78	GTEX
GTEX-11I78-1526-SM-5A5K7	Esophagus - Mucosa	Esophagus	female	GTEX-11I78	GTEX
GTEX-11I78-1626-SM-5A5M2	Esophagus - Gastroesophageal Junction	Esophagus	female	GTEX-11I78	GTEX
GTEX-11I78-1726-SM-5A5M3	Stomach	Stomach	female	GTEX-11I78	GTEX
GTEX-11I78-1826-SM-5A5M4	Adrenal Gland	Adrenal Gland	female	GTEX-11I78	GTEX
GTEX-11I78-1926-SM-59878	Ovary	Ovary	female	GTEX-11I78	GTEX
GTEX-11I78-2026-SM-5987C	Vagina	Vagina	female	GTEX-11I78	GTEX
GTEX-11I78-2126-SM-5A5K8	Uterus	Uterus	female	GTEX-11I78	GTEX
GTEX-11I78-2226-SM-5PNYA	Breast - Mammary Tissue	Breast	female	GTEX-11I78	GTEX
GTEX-11I78-2326-SM-5Q5AH	Artery - Tibial	Blood Vessel	female	GTEX-11I78	GTEX
GTEX-11I78-2426-SM-5A5K9	Muscle - Skeletal	Muscle	female	GTEX-11I78	GTEX
GTEX-11I78-2626-SM-5Q5AI	Adipose - Subcutaneous	Adipose Tissue	female	GTEX-11I78	GTEX
GTEX-11ILO-0006-SM-5LZWE	Whole Blood	Blood	female	GTEX-11ILO	GTEX
GTEX-11ILO-0008-SM-5QGR9	Cells - Transformed fibroblasts	Skin	female	GTEX-11ILO	GTEX
GTEX-11ILO-0126-SM-5A5LN	Skin - Sun Exposed (Lower leg)	Skin	female	GTEX-11ILO	GTEX
GTEX-11ILO-0226-SM-5N9D3	Adipose - Subcutaneous	Adipose Tissue	female	GTEX-11ILO	GTEX
GTEX-11ILO-0426-SM-5HL4V	Nerve - Tibial	Nerve	female	GTEX-11ILO	GTEX
GTEX-11ILO-0526-SM-5N9DF	Artery - Tibial	Blood Vessel	female	GTEX-11ILO	GTEX
GTEX-11ILO-0626-SM-5A5LO	Skin - Not Sun Exposed (Suprapubic)	Skin	female	GTEX-11ILO	GTEX
GTEX-11ILO-0726-SM-5HL5I	Lung	Lung	female	GTEX-11ILO	GTEX
GTEX-11ILO-1026-SM-5A5LP	Esophagus - Mucosa	Esophagus	female	GTEX-11ILO	GTEX
GTEX-11ILO-1526-SM-5A5KZ	Pancreas	Pancreas	female	GTEX-11ILO	GTEX
GTEX-11ILO-2026-SM-5N9CQ	Colon - Transverse	Colon	female	GTEX-11ILO	GTEX
GTEX-11ILO-2226-SM-5A5L1	Breast - Mammary Tissue	Breast	female	GTEX-11ILO	GTEX
GTEX-11ILO-2526-SM-5A5LQ	Heart - Atrial Appendage	Heart	female	GTEX-11ILO	GTEX
GTEX-11LCK-0005-SM-5O98U	Whole Blood	Blood	male	GTEX-11LCK	GTEX
GTEX-11LCK-0008-SM-5Q5BB	Cells - Transformed fibroblasts	Skin	male	GTEX-11LCK	GTEX
GTEX-11LCK-0126-SM-5A5M5	Spleen	Spleen	male	GTEX-11LCK	GTEX
GTEX-11LCK-0226-SM-5A5M6	Pancreas	Pancreas	male	GTEX-11LCK	GTEX
GTEX-11LCK-0326-SM-5A5M7	Adipose - Visceral (Omentum)	Adipose Tissue	male	GTEX-11LCK	GTEX
GTEX-11LCK-0426-SM-5A5M8	Lung	Lung	male	GTEX-11LCK	GTEX
GTEX-11LCK-0526-SM-5A5M9	Thyroid	Thyroid	male	GTEX-11LCK	GTEX
GTEX-11LCK-0726-SM-5PNYC	Artery - Aorta	Blood Vessel	male	GTEX-11LCK	GTEX
GTEX-11LCK-0826-SM-5PNYD	Heart - Atrial Appendage	Heart	male	GTEX-11LCK	GTEX
GTEX-11LCK-0926-SM-5A5KA	Heart - Left Ventricle	Heart	male	GTEX-11LCK	GTEX
GTEX-11LCK-1026-SM-5A5KB	Skin - Sun Exposed (Lower leg)	Skin	male	GTEX-11LCK	GTEX
GTEX-11LCK-1126-SM-5A5KC	Adipose - Subcutaneous	Adipose Tissue	male	GTEX-11LCK	GTEX
GTEX-11LCK-1226-SM-5Q5AM	Muscle - Skeletal	Muscle	male	GTEX-11LCK	GTEX
GTEX-11LCK-1326-SM-5Q5AN	Nerve - Tibial	Nerve	male	GTEX-11LCK	GTEX
GTEX-11LCK-1426-SM-5HL5R	Artery - Tibial	Blood Vessel	male	GTEX-11LCK	GTEX
GTEX-11LCK-1526-SM-5HL64	Esophagus - Gastroesophageal Junction	Esophagus	male	GTEX-11LCK	GTEX
GTEX-11LCK-1626-SM-5PNYB	Esophagus - Muscularis	Esophagus	male	GTEX-11LCK	GTEX
GTEX-11LCK-1726-SM-5S2OQ	Esophagus - Mucosa	Esophagus	male	GTEX-11LCK	GTEX
GTEX-11LCK-1926-SM-5A5KE	Small Intestine - Terminal Ileum	Small Intestine	male	GTEX-11LCK	GTEX
GTEX-11LCK-2026-SM-5A5MA	Colon - Transverse	Colon	male	GTEX-11LCK	GTEX
GTEX-11LCK-2226-SM-5HL4Q	Skin - Not Sun Exposed (Suprapubic)	Skin	male	GTEX-11LCK	GTEX
GTEX-11LCK-2326-SM-5HL53	Testis	Testis	male	GTEX-11LCK	GTEX
GTEX-11LCK-2426-SM-5HL5F	Breast - Mammary Tissue	Breast	male	GTEX-11LCK	GTEX
GTEX-11NSD-0005-SM-5LZZ5	Whole Blood	Blood	male	GTEX-11NSD	GTEX
GTEX-11NSD-0008-SM-5Q5BC	Cells - Transformed fibroblasts	Skin	male	GTEX-11NSD	GTEX
GTEX-11NSD-0126-SM-5987F	Thyroid	Thyroid	male	GTEX-11NSD	GTEX
GTEX-11NSD-0226-SM-5A5LR	Adrenal Gland	Adrenal Gland	male	GTEX-11NSD	GTEX
GTEX-11NSD-0326-SM-5A5LS	Lung	Lung	male	GTEX-11NSD	GTEX
GTEX-11NSD-0426-SM-5N9CR	Spleen	Spleen	male	GTEX-11NSD	GTEX
GTEX-11NSD-0526-SM-5A5LT	Pancreas	Pancreas	male	GTEX-11NSD	GTEX
GTEX-11NSD-0626-SM-5A5LU	Skin - Not Sun Exposed (Suprapubic)	Skin	male	GTEX-11NSD	GTEX
GTEX-11NSD-0826-SM-5986S	Prostate	Prostate	male	GTEX-11NSD	GTEX
GTEX-11NSD-0926-SM-5N9DR	Breast - Mammary Tissue	Breast	male	GTEX-11NSD	GTEX
GTEX-11NSD-1026-SM-5N9BE	Testis	Testis	male	GTEX-11NSD	GTEX
GTEX-11NSD-1126-SM-5N9BQ	Esophagus - Mucosa	Esophagus	male	GTEX-11NSD	GTEX
GTEX-11NSD-1226-SM-5986Q	Esophagus - Muscularis	Esophagus	male	GTEX-11NSD	GTEX
GTEX-11NSD-1426-SM-5HL67	Stomach	Stomach	male	GTEX-11NSD	GTEX
GTEX-11NSD-1626-SM-5986U	Colon - Transverse	Colon	male	GTEX-11NSD	GTEX
GTEX-11NSD-1726-SM-5N9C3	Small Intestine - Terminal Ileum	Small Intestine	male	GTEX-11NSD	GTEX
GTEX-11NSD-1826-SM-5N9CF	Nerve - Tibial	Nerve	male	GTEX-11NSD	GTEX
GTEX-11NSD-2026-SM-5HL5U	Muscle - Skeletal	Muscle	male	GTEX-11NSD	GTEX
GTEX-11NSD-2226-SM-5986V	Skin - Sun Exposed (Lower leg)	Skin	male	GTEX-11NSD	GTEX
GTEX-11NUK-0005-SM-5MR5F	Whole Blood	Blood	male	GTEX-11NUK	GTEX
GTEX-11NUK-0008-SM-5Q5B9	Cells - Transformed fibroblasts	Skin	male	GTEX-11NUK	GTEX
GTEX-11NUK-0126-SM-5A5L3	Skin - Sun Exposed (Lower leg)	Skin	male	GTEX-11NUK	GTEX
GTEX-11NUK-0226-SM-5A5L4	Muscle - Skeletal	Muscle	male	GTEX-11NUK	GTEX
GTEX-11NUK-0426-SM-5HL5V	Nerve - Tibial	Nerve	male	GTEX-11NUK	GTEX
GTEX-11NUK-0526-SM-5A5L5	Artery - Tibial	Blood Vessel	male	GTEX-11NUK	GTEX
GTEX-11NUK-0726-SM-5A5ME	Artery - Aorta	Blood Vessel	male	GTEX-11NUK	GTEX
GTEX-11NUK-0826-SM-5HL4U	Lung	Lung	male	GTEX-11NUK	GTEX
GTEX-11NUK-0926-SM-5HL57	Heart - Atrial Appendage	Heart	male	GTEX-11NUK	GTEX
GTEX-11NUK-1026-SM-5HL5J	Thyroid	Thyroid	male	GTEX-11NUK	GTEX
GTEX-11NUK-1226-SM-5P9GM	Liver	Liver	male	GTEX-11NUK	GTEX
GTEX-11NUK-1326-SM-5P9GN	Esophagus - Mucosa	Esophagus	male	GTEX-11NUK	GTEX
GTEX-11NUK-1426-SM-5HL68	Esophagus - Muscularis	Esophagus	male	GTEX-11NUK	GTEX
GTEX-11NUK-1726-SM-5A5L2	Esophagus - Gastroesophageal Junction	Esophagus	male	GTEX-11NUK	GTEX
GTEX-11NUK-2026-SM-5PNVZ	Adipose - Visceral (Omentum)	Adipose Tissue	male	GTEX-11NUK	GTEX
GTEX-11NUK-2426-SM-5BC4U	Stomach	Stomach	male	GTEX-11NUK	GTEX
GTEX-11NUK-2626-SM-5A5MB	Testis	Testis	male	GTEX-11NUK	GTEX
GTEX-11NUK-2726-SM-5A5MC	Skin - Not Sun Exposed (Suprapubic)	Skin	male	GTEX-11NUK	GTEX
GTEX-11NUK-2926-SM-5A5MD	Brain - Cortex	Brain	male	GTEX-11NUK	GTEX
GTEX-11NUK-3026-SM-5986K	Brain - Cerebellum	Brain	male	GTEX-11NUK	GTEX
GTEX-11NUK-3126-SM-5986M	Pituitary	Pituitary	male	GTEX-11NUK	GTEX
GTEX-11NV4-0005-SM-5N9EX	Whole Blood	Blood	male	GTEX-11NV4	GTEX
GTEX-11NV4-0008-SM-5Q5BA	Cells - Transformed fibroblasts	Skin	male	GTEX-11NV4	GTEX
GTEX-11NV4-0011-R5a-SM-5NQ88	Brain - Caudate (basal ganglia)	Brain	male	GTEX-11NV4	GTEX
GTEX-11NV4-0011-R6a-SM-57WD5	Brain - Nucleus accumbens (basal ganglia)	Brain	male	GTEX-11NV4	GTEX
GTEX-11NV4-0011-R7a-SM-57WDH	Brain - Putamen (basal ganglia)	Brain	male	GTEX-11NV4	GTEX
GTEX-11NV4-0326-SM-5HL58	Muscle - Skeletal	Muscle	male	GTEX-11NV4	GTEX
GTEX-11NV4-0526-SM-5N9BF	Artery - Tibial	Blood Vessel	male	GTEX-11NV4	GTEX
GTEX-11NV4-0626-SM-5N9BR	Thyroid	Thyroid	male	GTEX-11NV4	GTEX
GTEX-11NV4-0826-SM-5BC4S	Heart - Atrial Appendage	Heart	male	GTEX-11NV4	GTEX
GTEX-11NV4-1126-SM-5HL6J	Lung	Lung	male	GTEX-11NV4	GTEX
GTEX-11NV4-1326-SM-5HL6V	Liver	Liver	male	GTEX-11NV4	GTEX
GTEX-11NV4-1426-SM-5BC4W	Adipose - Visceral (Omentum)	Adipose Tissue	male	GTEX-11NV4	GTEX
GTEX-11NV4-1726-SM-5N9FC	Testis	Testis	male	GTEX-11NV4	GTEX
GTEX-11NV4-1926-SM-5N9D4	Minor Salivary Gland	Salivary Gland	male	GTEX-11NV4	GTEX
GTEX-11NV4-2026-SM-5N9DG	Breast - Mammary Tissue	Breast	male	GTEX-11NV4	GTEX
GTEX-11NV4-2126-SM-5N9DS	Brain - Cortex	Brain	male	GTEX-11NV4	GTEX
GTEX-11NV4-2226-SM-5BC4T	Brain - Cerebellum	Brain	male	GTEX-11NV4	GTEX
GTEX-11NV4-2326-SM-5BC4X	Pituitary	Pituitary	male	GTEX-11NV4	GTEX
GTEX-11O72-0006-SM-5O9DB	Whole Blood	Blood	male	GTEX-11O72	GTEX
GTEX-11O72-0008-SM-5Q5DN	Cells - Transformed fibroblasts	Skin	male	GTEX-11O72	GTEX
GTEX-11O72-0126-SM-59887	Skin - Sun Exposed (Lower leg)	Skin	male	GTEX-11O72	GTEX
GTEX-11O72-0226-SM-59869	Adipose - Subcutaneous	Adipose Tissue	male	GTEX-11O72	GTEX
GTEX-11O72-0326-SM-5986D	Muscle - Skeletal	Muscle	male	GTEX-11O72	GTEX
GTEX-11O72-0426-SM-5BC5B	Artery - Tibial	Blood Vessel	male	GTEX-11O72	GTEX
GTEX-11O72-0526-SM-5Q5AO	Nerve - Tibial	Nerve	male	GTEX-11O72	GTEX
GTEX-11O72-0626-SM-5PNYE	Skin - Not Sun Exposed (Suprapubic)	Skin	male	GTEX-11O72	GTEX
GTEX-11O72-0726-SM-5P9GO	Testis	Testis	male	GTEX-11O72	GTEX
GTEX-11O72-1026-SM-5986B	Heart - Atrial Appendage	Heart	male	GTEX-11O72	GTEX
GTEX-11O72-1126-SM-5N9E2	Heart - Left Ventricle	Heart	male	GTEX-11O72	GTEX
GTEX-11O72-1326-SM-5BC5A	Lung	Lung	male	GTEX-11O72	GTEX
GTEX-11O72-1926-SM-5PNW1	Esophagus - Muscularis	Esophagus	male	GTEX-11O72	GTEX
GTEX-11O72-2026-SM-5N9G8	Esophagus - Gastroesophageal Junction	Esophagus	male	GTEX-11O72	GTEX
GTEX-11O72-2126-SM-5N9FO	Breast - Mammary Tissue	Breast	male	GTEX-11O72	GTEX
GTEX-11O72-2226-SM-5PNW2	Colon - Transverse	Colon	male	GTEX-11O72	GTEX
GTEX-11O72-2326-SM-5BC7H	Thyroid	Thyroid	male	GTEX-11O72	GTEX
GTEX-11O72-2726-SM-5HL6K	Prostate	Prostate	male	GTEX-11O72	GTEX
GTEX-11O72-2826-SM-5HL6W	Brain - Cerebellum	Brain	male	GTEX-11O72	GTEX
GTEX-11O72-2926-SM-5BC4V	Brain - Cortex	Brain	male	GTEX-11O72	GTEX
GTEX-11O72-3026-SM-5986R	Pituitary	Pituitary	male	GTEX-11O72	GTEX
GTEX-11OC5-0004-SM-5S2O6	Cells - EBV-transformed lymphocytes	Blood	male	GTEX-11OC5	GTEX
GTEX-11OC5-0006-SM-5N9FA	Whole Blood	Blood	male	GTEX-11OC5	GTEX
GTEX-11OC5-0008-SM-5S2OH	Cells - Transformed fibroblasts	Skin	male	GTEX-11OC5	GTEX
GTEX-11OC5-0126-SM-5HL6A	Skin - Sun Exposed (Lower leg)	Skin	male	GTEX-11OC5	GTEX
GTEX-11OC5-0326-SM-5PNW5	Muscle - Skeletal	Muscle	male	GTEX-11OC5	GTEX
GTEX-11OC5-0426-SM-5Q5AR	Artery - Tibial	Blood Vessel	male	GTEX-11OC5	GTEX
GTEX-11OC5-0526-SM-5N9EE	Nerve - Tibial	Nerve	male	GTEX-11OC5	GTEX
GTEX-11OC5-0626-SM-5HL6M	Brain - Cerebellum	Brain	male	GTEX-11OC5	GTEX
GTEX-11OC5-0726-SM-5P9JK	Brain - Cortex	Brain	male	GTEX-11OC5	GTEX
GTEX-11OF3-0006-SM-5O9CM	Whole Blood	Blood	male	GTEX-11OF3	GTEX
GTEX-11OF3-0008-SM-5S2NH	Cells - Transformed fibroblasts	Skin	male	GTEX-11OF3	GTEX
GTEX-11OF3-0011-R11a-SM-57WCR	Brain - Cerebellar Hemisphere	Brain	male	GTEX-11OF3	GTEX
GTEX-11OF3-0011-R5a-SM-57WB4	Brain - Caudate (basal ganglia)	Brain	male	GTEX-11OF3	GTEX
GTEX-11OF3-0011-R6b-SM-57WBG	Brain - Nucleus accumbens (basal ganglia)	Brain	male	GTEX-11OF3	GTEX
GTEX-11OF3-0011-R7a-SM-57WCG	Brain - Putamen (basal ganglia)	Brain	male	GTEX-11OF3	GTEX
GTEX-11OF3-0011-R8b-SM-57WCS	Brain - Hypothalamus	Brain	male	GTEX-11OF3	GTEX
GTEX-11OF3-0126-SM-5PNYF	Skin - Not Sun Exposed (Suprapubic)	Skin	male	GTEX-11OF3	GTEX
GTEX-11OF3-0626-SM-5BC4Y	Thyroid	Thyroid	male	GTEX-11OF3	GTEX
GTEX-11OF3-0726-SM-5BC4Z	Liver	Liver	male	GTEX-11OF3	GTEX
GTEX-11OF3-0826-SM-5BC51	Adipose - Visceral (Omentum)	Adipose Tissue	male	GTEX-11OF3	GTEX
GTEX-11OF3-1126-SM-5986C	Lung	Lung	male	GTEX-11OF3	GTEX
GTEX-11OF3-1326-SM-5N9FJ	Kidney - Cortex	Kidney	male	GTEX-11OF3	GTEX
GTEX-11OF3-1726-SM-5GU5Q	Prostate	Prostate	male	GTEX-11OF3	GTEX
GTEX-11OF3-1826-SM-5987N	Testis	Testis	male	GTEX-11OF3	GTEX
GTEX-11OF3-1926-SM-59889	Breast - Mammary Tissue	Breast	male	GTEX-11OF3	GTEX
GTEX-11OF3-2226-SM-5986F	Esophagus - Muscularis	Esophagus	male	GTEX-11OF3	GTEX
GTEX-11OF3-2326-SM-5GU73	Esophagus - Gastroesophageal Junction	Esophagus	male	GTEX-11OF3	GTEX
GTEX-11OF3-2426-SM-5Q5AS	Adipose - Subcutaneous	Adipose Tissue	male	GTEX-11OF3	GTEX
GTEX-11OF3-2526-SM-5P9JL	Muscle - Skeletal	Muscle	male	GTEX-11OF3	GTEX
GTEX-11OF3-2626-SM-5GU7F	Skin - Sun Exposed (Lower leg)	Skin	male	GTEX-11OF3	GTEX
GTEX-11OF3-2926-SM-5HL78	Brain - Cortex	Brain	male	GTEX-11OF3	GTEX
GTEX-11OF3-3026-SM-5GU52	Pituitary	Pituitary	male	GTEX-11OF3	GTEX
GTEX-11OF3-3126-SM-5GU5E	Brain - Cerebellum	Brain	male	GTEX-11OF3	GTEX
GTEX-11ONC-0005-SM-5O9CY	Whole Blood	Blood	male	GTEX-11ONC	GTEX
GTEX-11ONC-0008-SM-5S2MG	Cells - Transformed fibroblasts	Skin	male	GTEX-11ONC	GTEX
GTEX-11ONC-0011-R1a-SM-57WD4	Brain - Hippocampus	Brain	male	GTEX-11ONC	GTEX
GTEX-11ONC-0011-R8b-SM-5NQ87	Brain - Hypothalamus	Brain	male	GTEX-11ONC	GTEX
GTEX-11ONC-0011-R9b-SM-5NQ8J	Brain - Spinal cord (cervical c-1)	Brain	male	GTEX-11ONC	GTEX
GTEX-11ONC-0126-SM-5PNW6	Heart - Left Ventricle	Heart	male	GTEX-11ONC	GTEX
GTEX-11ONC-0526-SM-5BC57	Pancreas	Pancreas	male	GTEX-11ONC	GTEX
GTEX-11ONC-0926-SM-5BC5E	Artery - Aorta	Blood Vessel	male	GTEX-11ONC	GTEX
GTEX-11ONC-1026-SM-5GU64	Heart - Atrial Appendage	Heart	male	GTEX-11ONC	GTEX
GTEX-11ONC-1126-SM-5GU6G	Artery - Coronary	Blood Vessel	male	GTEX-11ONC	GTEX
GTEX-11ONC-1426-SM-5N9F4	Esophagus - Muscularis	Esophagus	male	GTEX-11ONC	GTEX
GTEX-11ONC-1526-SM-5GU6S	Esophagus - Mucosa	Esophagus	male	GTEX-11ONC	GTEX
GTEX-11ONC-1926-SM-5GU75	Colon - Sigmoid	Colon	male	GTEX-11ONC	GTEX
GTEX-11ONC-2026-SM-5HL61	Colon - Transverse	Colon	male	GTEX-11ONC	GTEX
GTEX-11ONC-2126-SM-5HL6E	Breast - Mammary Tissue	Breast	male	GTEX-11ONC	GTEX
GTEX-11ONC-2226-SM-5HL6D	Testis	Testis	male	GTEX-11ONC	GTEX
GTEX-11ONC-2326-SM-5HL6P	Nerve - Tibial	Nerve	male	GTEX-11ONC	GTEX
GTEX-11ONC-2426-SM-5GU7H	Muscle - Skeletal	Muscle	male	GTEX-11ONC	GTEX
GTEX-11ONC-2526-SM-5986W	Adipose - Subcutaneous	Adipose Tissue	male	GTEX-11ONC	GTEX
GTEX-11ONC-2726-SM-5N9DZ	Artery - Tibial	Blood Vessel	male	GTEX-11ONC	GTEX
GTEX-11ONC-2826-SM-5P9GQ	Pituitary	Pituitary	male	GTEX-11ONC	GTEX
GTEX-11ONC-2926-SM-5P9JM	Brain - Cortex	Brain	male	GTEX-11ONC	GTEX
GTEX-11ONC-3026-SM-5985W	Brain - Cerebellum	Brain	male	GTEX-11ONC	GTEX
GTEX-11P7K-0003-SM-5S2OU	Cells - EBV-transformed lymphocytes	Blood	male	GTEX-11P7K	GTEX
GTEX-11P7K-0006-SM-5N9FM	Whole Blood	Blood	male	GTEX-11P7K	GTEX
GTEX-11P7K-0008-SM-5S2O5	Cells - Transformed fibroblasts	Skin	male	GTEX-11P7K	GTEX
GTEX-11P7K-0126-SM-5986E	Adrenal Gland	Adrenal Gland	male	GTEX-11P7K	GTEX
GTEX-11P7K-0226-SM-5986Z	Thyroid	Thyroid	male	GTEX-11P7K	GTEX
GTEX-11P7K-0326-SM-59871	Lung	Lung	male	GTEX-11P7K	GTEX
GTEX-11P7K-0426-SM-5BC5H	Spleen	Spleen	male	GTEX-11P7K	GTEX
GTEX-11P7K-0526-SM-5BC5I	Pancreas	Pancreas	male	GTEX-11P7K	GTEX
GTEX-11P7K-0626-SM-5985Z	Prostate	Prostate	male	GTEX-11P7K	GTEX
GTEX-11P7K-0726-SM-5EGKX	Breast - Mammary Tissue	Breast	male	GTEX-11P7K	GTEX
GTEX-11P7K-0826-SM-5BC5F	Adipose - Visceral (Omentum)	Adipose Tissue	male	GTEX-11P7K	GTEX
GTEX-11P7K-1026-SM-5HL6Y	Testis	Testis	male	GTEX-11P7K	GTEX
GTEX-11P7K-1126-SM-5HL4L	Skin - Not Sun Exposed (Suprapubic)	Skin	male	GTEX-11P7K	GTEX
GTEX-11P7K-1226-SM-5HL4X	Esophagus - Muscularis	Esophagus	male	GTEX-11P7K	GTEX
GTEX-11P7K-1326-SM-5BC5G	Esophagus - Mucosa	Esophagus	male	GTEX-11P7K	GTEX
GTEX-11P7K-1426-SM-5EGKY	Esophagus - Gastroesophageal Junction	Esophagus	male	GTEX-11P7K	GTEX
GTEX-11P7K-1526-SM-5EGI7	Colon - Transverse	Colon	male	GTEX-11P7K	GTEX
GTEX-11P7K-1626-SM-5GU63	Small Intestine - Terminal Ileum	Small Intestine	male	GTEX-11P7K	GTEX
GTEX-11P7K-1726-SM-5GU6F	Stomach	Stomach	male	GTEX-11P7K	GTEX
GTEX-11P7K-1826-SM-5HL5A	Colon - Sigmoid	Colon	male	GTEX-11P7K	GTEX
GTEX-11P7K-1926-SM-5GU6R	Muscle - Skeletal	Muscle	male	GTEX-11P7K	GTEX
GTEX-11P7K-2026-SM-5GU74	Adipose - Subcutaneous	Adipose Tissue	male	GTEX-11P7K	GTEX
GTEX-11P7K-2126-SM-5GU7G	Skin - Sun Exposed (Lower leg)	Skin	male	GTEX-11P7K	GTEX
GTEX-11P7K-2226-SM-5GU56	Nerve - Tibial	Nerve	male	GTEX-11P7K	GTEX
GTEX-11P7K-2326-SM-5EGKZ	Artery - Tibial	Blood Vessel	male	GTEX-11P7K	GTEX
GTEX-11P81-0006-SM-5NQ7A	Whole Blood	Blood	female	GTEX-11P81	GTEX
GTEX-11P81-0008-SM-5S2OT	Cells - Transformed fibroblasts	Skin	female	GTEX-11P81	GTEX
GTEX-11P81-0126-SM-5HL5Y	Thyroid	Thyroid	female	GTEX-11P81	GTEX
GTEX-11P81-0226-SM-5HL5M	Lung	Lung	female	GTEX-11P81	GTEX
GTEX-11P81-0326-SM-5HL6B	Artery - Aorta	Blood Vessel	female	GTEX-11P81	GTEX
GTEX-11P81-0526-SM-59873	Heart - Atrial Appendage	Heart	female	GTEX-11P81	GTEX
GTEX-11P81-0726-SM-5PNYH	Adipose - Visceral (Omentum)	Adipose Tissue	female	GTEX-11P81	GTEX
GTEX-11P81-0826-SM-5P9GR	Esophagus - Mucosa	Esophagus	female	GTEX-11P81	GTEX
GTEX-11P81-0926-SM-59874	Esophagus - Muscularis	Esophagus	female	GTEX-11P81	GTEX
GTEX-11P81-1026-SM-5GU54	Esophagus - Gastroesophageal Junction	Esophagus	female	GTEX-11P81	GTEX
GTEX-11P81-1126-SM-5GU5G	Colon - Transverse	Colon	female	GTEX-11P81	GTEX
GTEX-11P81-1326-SM-5GU5S	Spleen	Spleen	female	GTEX-11P81	GTEX
GTEX-11P81-1426-SM-5P9JN	Colon - Sigmoid	Colon	female	GTEX-11P81	GTEX
GTEX-11P81-1526-SM-5P9GS	Ovary	Ovary	female	GTEX-11P81	GTEX
GTEX-11P81-1626-SM-5BC52	Uterus	Uterus	female	GTEX-11P81	GTEX
GTEX-11P81-1926-SM-5BC53	Breast - Mammary Tissue	Breast	female	GTEX-11P81	GTEX
GTEX-11P81-2026-SM-5P9GT	Minor Salivary Gland	Salivary Gland	female	GTEX-11P81	GTEX
GTEX-11P81-2126-SM-5HL6N	Vagina	Vagina	female	GTEX-11P81	GTEX
GTEX-11P81-2226-SM-5PNYI	Skin - Not Sun Exposed (Suprapubic)	Skin	female	GTEX-11P81	GTEX
GTEX-11P81-2326-SM-59875	Skin - Sun Exposed (Lower leg)	Skin	female	GTEX-11P81	GTEX
GTEX-11P81-2426-SM-5GU65	Adipose - Subcutaneous	Adipose Tissue	female	GTEX-11P81	GTEX
GTEX-11P81-2526-SM-5GU6H	Muscle - Skeletal	Muscle	female	GTEX-11P81	GTEX
GTEX-11P81-2626-SM-5GU6T	Nerve - Tibial	Nerve	female	GTEX-11P81	GTEX
GTEX-11P81-2726-SM-59876	Artery - Tibial	Blood Vessel	female	GTEX-11P81	GTEX
GTEX-11P82-0006-SM-5N9FY	Whole Blood	Blood	male	GTEX-11P82	GTEX
GTEX-11P82-0008-SM-5S2MS	Cells - Transformed fibroblasts	Skin	male	GTEX-11P82	GTEX
GTEX-11P82-0126-SM-5HL72	Artery - Aorta	Blood Vessel	male	GTEX-11P82	GTEX
GTEX-11P82-0226-SM-5HL4O	Thyroid	Thyroid	male	GTEX-11P82	GTEX
GTEX-11P82-0326-SM-5HL51	Adipose - Visceral (Omentum)	Adipose Tissue	male	GTEX-11P82	GTEX
GTEX-11P82-0426-SM-5HL5D	Esophagus - Gastroesophageal Junction	Esophagus	male	GTEX-11P82	GTEX
GTEX-11P82-0526-SM-5986P	Esophagus - Mucosa	Esophagus	male	GTEX-11P82	GTEX
GTEX-11P82-0626-SM-5PNYK	Esophagus - Muscularis	Esophagus	male	GTEX-11P82	GTEX
GTEX-11P82-0726-SM-5PNYL	Stomach	Stomach	male	GTEX-11P82	GTEX
GTEX-11P82-0826-SM-5P9GU	Small Intestine - Terminal Ileum	Small Intestine	male	GTEX-11P82	GTEX
GTEX-11P82-0926-SM-5986X	Minor Salivary Gland	Salivary Gland	male	GTEX-11P82	GTEX
GTEX-11P82-1026-SM-5BC5J	Colon - Transverse	Colon	male	GTEX-11P82	GTEX
GTEX-11P82-1126-SM-5BC5K	Prostate	Prostate	male	GTEX-11P82	GTEX
GTEX-11P82-1226-SM-5HL5P	Colon - Sigmoid	Colon	male	GTEX-11P82	GTEX
GTEX-11P82-1326-SM-5HL62	Breast - Mammary Tissue	Breast	male	GTEX-11P82	GTEX
GTEX-11P82-1426-SM-5BC5L	Skin - Not Sun Exposed (Suprapubic)	Skin	male	GTEX-11P82	GTEX
GTEX-11P82-1526-SM-5BC5M	Testis	Testis	male	GTEX-11P82	GTEX
GTEX-11P82-1626-SM-59879	Skin - Sun Exposed (Lower leg)	Skin	male	GTEX-11P82	GTEX
GTEX-11P82-1726-SM-5Q5AT	Adipose - Subcutaneous	Adipose Tissue	male	GTEX-11P82	GTEX
GTEX-11P82-1826-SM-5PNYJ	Muscle - Skeletal	Muscle	male	GTEX-11P82	GTEX
GTEX-11P82-1926-SM-5Q5AU	Nerve - Tibial	Nerve	male	GTEX-11P82	GTEX
GTEX-11PRG-0005-SM-5NQ6X	Whole Blood	Blood	male	GTEX-11PRG	GTEX
GTEX-11PRG-0008-SM-5S2N5	Cells - Transformed fibroblasts	Skin	male	GTEX-11PRG	GTEX
GTEX-11PRG-0126-SM-5BC55	Nerve - Tibial	Nerve	male	GTEX-11PRG	GTEX
GTEX-11PRG-0326-SM-5GU53	Muscle - Skeletal	Muscle	male	GTEX-11PRG	GTEX
GTEX-11PRG-0626-SM-5BC56	Adipose - Subcutaneous	Adipose Tissue	male	GTEX-11PRG	GTEX
GTEX-11PRG-0726-SM-5EGL1	Skin - Not Sun Exposed (Suprapubic)	Skin	male	GTEX-11PRG	GTEX
GTEX-11PRG-0826-SM-5EQ6A	Breast - Mammary Tissue	Breast	male	GTEX-11PRG	GTEX
GTEX-11PRG-0926-SM-5EGI8	Lung	Lung	male	GTEX-11PRG	GTEX
GTEX-11PRG-1526-SM-5HL6Z	Adipose - Visceral (Omentum)	Adipose Tissue	male	GTEX-11PRG	GTEX
GTEX-11PRG-2026-SM-5GU5F	Colon - Sigmoid	Colon	male	GTEX-11PRG	GTEX
GTEX-11PRG-2226-SM-5GU5R	Kidney - Cortex	Kidney	male	GTEX-11PRG	GTEX
GTEX-11PRG-2826-SM-5BC54	Brain - Cerebellum	Brain	male	GTEX-11PRG	GTEX
GTEX-11PRG-2926-SM-5987A	Brain - Cortex	Brain	male	GTEX-11PRG	GTEX
GTEX-11TT1-0004-SM-5S2NT	Cells - EBV-transformed lymphocytes	Blood	male	GTEX-11TT1	GTEX
GTEX-11TT1-0005-SM-5NQ8Y	Whole Blood	Blood	male	GTEX-11TT1	GTEX
GTEX-11TT1-0008-SM-5S2P8	Cells - Transformed fibroblasts	Skin	male	GTEX-11TT1	GTEX
GTEX-11TT1-0126-SM-5LUAA	Adrenal Gland	Adrenal Gland	male	GTEX-11TT1	GTEX
GTEX-11TT1-0326-SM-5LUAY	Pancreas	Pancreas	male	GTEX-11TT1	GTEX
GTEX-11TT1-0426-SM-5EGI9	Esophagus - Muscularis	Esophagus	male	GTEX-11TT1	GTEX
GTEX-11TT1-0526-SM-5P9JO	Esophagus - Mucosa	Esophagus	male	GTEX-11TT1	GTEX
GTEX-11TT1-0626-SM-5GU4X	Esophagus - Gastroesophageal Junction	Esophagus	male	GTEX-11TT1	GTEX
GTEX-11TT1-0726-SM-5GU5A	Stomach	Stomach	male	GTEX-11TT1	GTEX
GTEX-11TT1-0926-SM-5GU5M	Colon - Sigmoid	Colon	male	GTEX-11TT1	GTEX
GTEX-11TT1-1026-SM-5PNW7	Colon - Transverse	Colon	male	GTEX-11TT1	GTEX
GTEX-11TT1-1126-SM-5P9GV	Thyroid	Thyroid	male	GTEX-11TT1	GTEX
GTEX-11TT1-1226-SM-5Q5AV	Artery - Aorta	Blood Vessel	male	GTEX-11TT1	GTEX
GTEX-11TT1-1326-SM-5PNYM	Heart - Left Ventricle	Heart	male	GTEX-11TT1	GTEX
GTEX-11TT1-1426-SM-5EGIA	Heart - Atrial Appendage	Heart	male	GTEX-11TT1	GTEX
GTEX-11TT1-1526-SM-5EQKU	Artery - Coronary	Blood Vessel	male	GTEX-11TT1	GTEX
GTEX-11TT1-1626-SM-5EQL7	Lung	Lung	male	GTEX-11TT1	GTEX
GTEX-11TT1-1726-SM-5EQLJ	Liver	Liver	male	GTEX-11TT1	GTEX
GTEX-11TT1-1826-SM-5EQLV	Skin - Not Sun Exposed (Suprapubic)	Skin	male	GTEX-11TT1	GTEX
GTEX-11TT1-1926-SM-5PNYN	Adipose - Visceral (Omentum)	Adipose Tissue	male	GTEX-11TT1	GTEX
GTEX-11TT1-2026-SM-5EQM8	Prostate	Prostate	male	GTEX-11TT1	GTEX
GTEX-11TT1-2126-SM-5GU5Y	Breast - Mammary Tissue	Breast	male	GTEX-11TT1	GTEX
GTEX-11TT1-2226-SM-5GU6B	Testis	Testis	male	GTEX-11TT1	GTEX
GTEX-11TT1-2326-SM-5GU6N	Muscle - Skeletal	Muscle	male	GTEX-11TT1	GTEX
GTEX-11TT1-2426-SM-5EQMK	Adipose - Subcutaneous	Adipose Tissue	male	GTEX-11TT1	GTEX
GTEX-11TT1-2526-SM-5EGIB	Skin - Sun Exposed (Lower leg)	Skin	male	GTEX-11TT1	GTEX
GTEX-11TT1-2626-SM-5EGL2	Nerve - Tibial	Nerve	male	GTEX-11TT1	GTEX
GTEX-11TT1-2726-SM-5LU8L	Artery - Tibial	Blood Vessel	male	GTEX-11TT1	GTEX
GTEX-11TTK-0005-SM-5O9BX	Whole Blood	Blood	female	GTEX-11TTK	GTEX
GTEX-11TTK-0008-SM-5S2RU	Cells - Transformed fibroblasts	Skin	female	GTEX-11TTK	GTEX
GTEX-11TTK-0126-SM-5987B	Skin - Sun Exposed (Lower leg)	Skin	female	GTEX-11TTK	GTEX
GTEX-11TTK-0226-SM-5N9EC	Adipose - Subcutaneous	Adipose Tissue	female	GTEX-11TTK	GTEX
GTEX-11TTK-0326-SM-5BC5N	Muscle - Skeletal	Muscle	female	GTEX-11TTK	GTEX
GTEX-11TTK-0426-SM-5EQLT	Nerve - Tibial	Nerve	female	GTEX-11TTK	GTEX
GTEX-11TTK-0826-SM-5N9EG	Thyroid	Thyroid	female	GTEX-11TTK	GTEX
GTEX-11TTK-1926-SM-5PNW8	Kidney - Cortex	Kidney	female	GTEX-11TTK	GTEX
GTEX-11TTK-2426-SM-5PNYO	Colon - Transverse	Colon	female	GTEX-11TTK	GTEX
GTEX-11TTK-2726-SM-5GU58	Vagina	Vagina	female	GTEX-11TTK	GTEX
GTEX-11TTK-2826-SM-5GU5K	Brain - Cerebellum	Brain	female	GTEX-11TTK	GTEX
GTEX-11TTK-2926-SM-5PNYP	Brain - Cortex	Brain	female	GTEX-11TTK	GTEX
GTEX-11TUW-0006-SM-5LZW2	Whole Blood	Blood	male	GTEX-11TUW	GTEX
GTEX-11TUW-0008-SM-5SI6S	Cells - Transformed fibroblasts	Skin	male	GTEX-11TUW	GTEX
GTEX-11TUW-0011-R5b-SM-5BC6Q	Brain - Caudate (basal ganglia)	Brain	male	GTEX-11TUW	GTEX
GTEX-11TUW-0226-SM-5LU8X	Thyroid	Thyroid	male	GTEX-11TUW	GTEX
GTEX-11TUW-0526-SM-5LU9A	Lung	Lung	male	GTEX-11TUW	GTEX
GTEX-11TUW-0626-SM-5LU9M	Skin - Not Sun Exposed (Suprapubic)	Skin	male	GTEX-11TUW	GTEX
GTEX-11TUW-0926-SM-5EQMW	Artery - Aorta	Blood Vessel	male	GTEX-11TUW	GTEX
GTEX-11TUW-1026-SM-5GU7D	Heart - Left Ventricle	Heart	male	GTEX-11TUW	GTEX
GTEX-11TUW-1126-SM-5EQKJ	Heart - Atrial Appendage	Heart	male	GTEX-11TUW	GTEX
GTEX-11TUW-1226-SM-5GU7C	Esophagus - Muscularis	Esophagus	male	GTEX-11TUW	GTEX
GTEX-11TUW-1326-SM-5EQKV	Esophagus - Mucosa	Esophagus	male	GTEX-11TUW	GTEX
GTEX-11TUW-1726-SM-5BC5C	Liver	Liver	male	GTEX-11TUW	GTEX
GTEX-11TUW-1826-SM-5BC5D	Breast - Mammary Tissue	Breast	male	GTEX-11TUW	GTEX
GTEX-11TUW-1926-SM-5BC58	Small Intestine - Terminal Ileum	Small Intestine	male	GTEX-11TUW	GTEX
GTEX-11TUW-2026-SM-5EQL8	Colon - Transverse	Colon	male	GTEX-11TUW	GTEX
GTEX-11TUW-2126-SM-5GU7B	Prostate	Prostate	male	GTEX-11TUW	GTEX
GTEX-11TUW-2226-SM-5EQL9	Testis	Testis	male	GTEX-11TUW	GTEX
GTEX-11TUW-2326-SM-5EQMO	Colon - Sigmoid	Colon	male	GTEX-11TUW	GTEX
GTEX-11TUW-2426-SM-5EQKB	Minor Salivary Gland	Salivary Gland	male	GTEX-11TUW	GTEX
GTEX-11TUW-2526-SM-5EQKN	Muscle - Skeletal	Muscle	male	GTEX-11TUW	GTEX
GTEX-11TUW-2626-SM-5EQKZ	Adipose - Subcutaneous	Adipose Tissue	male	GTEX-11TUW	GTEX
GTEX-11TUW-2726-SM-5EQLC	Skin - Sun Exposed (Lower leg)	Skin	male	GTEX-11TUW	GTEX
GTEX-11TUW-2926-SM-5BC59	Artery - Tibial	Blood Vessel	male	GTEX-11TUW	GTEX
GTEX-11TUW-3026-SM-5EGKM	Pituitary	Pituitary	male	GTEX-11TUW	GTEX
GTEX-11TUW-3126-SM-5GU4Y	Brain - Cortex	Brain	male	GTEX-11TUW	GTEX
GTEX-11UD1-0008-SM-5S2P6	Cells - Transformed fibroblasts	Skin	female	GTEX-11UD1	GTEX
GTEX-11UD1-0011-R1b-SM-5BC7D	Brain - Hippocampus	Brain	female	GTEX-11UD1	GTEX
GTEX-11UD1-0011-R2b-SM-5BC6O	Brain - Substantia nigra	Brain	female	GTEX-11UD1	GTEX
GTEX-11UD1-0011-R3a-SM-5BC6S	Brain - Anterior cingulate cortex (BA24)	Brain	female	GTEX-11UD1	GTEX
GTEX-11UD1-0011-R5b-SM-5P9FP	Brain - Caudate (basal ganglia)	Brain	female	GTEX-11UD1	GTEX
GTEX-11UD1-0126-SM-5PNYG	Skin - Sun Exposed (Lower leg)	Skin	female	GTEX-11UD1	GTEX
GTEX-11UD1-0226-SM-5EQKL	Adipose - Subcutaneous	Adipose Tissue	female	GTEX-11UD1	GTEX
GTEX-11UD1-0326-SM-5EQKX	Muscle - Skeletal	Muscle	female	GTEX-11UD1	GTEX
GTEX-11UD2-0005-SM-5NQ9B	Whole Blood	Blood	male	GTEX-11UD2	GTEX
GTEX-11UD2-0126-SM-5EQL2	Adipose - Subcutaneous	Adipose Tissue	male	GTEX-11UD2	GTEX
GTEX-11UD2-0226-SM-5EQKY	Skin - Sun Exposed (Lower leg)	Skin	male	GTEX-11UD2	GTEX
GTEX-11UD2-0326-SM-5EQLE	Muscle - Skeletal	Muscle	male	GTEX-11UD2	GTEX
GTEX-11UD2-0426-SM-5EQ5W	Nerve - Tibial	Nerve	male	GTEX-11UD2	GTEX
GTEX-11UD2-0526-SM-5GU69	Artery - Tibial	Blood Vessel	male	GTEX-11UD2	GTEX
GTEX-11UD2-0626-SM-5GU6L	Thyroid	Thyroid	male	GTEX-11UD2	GTEX
GTEX-11UD2-0726-SM-5EQ69	Lung	Lung	male	GTEX-11UD2	GTEX
GTEX-11UD2-0826-SM-5EQKS	Artery - Aorta	Blood Vessel	male	GTEX-11UD2	GTEX
GTEX-11UD2-0926-SM-5CVL6	Heart - Atrial Appendage	Heart	male	GTEX-11UD2	GTEX
GTEX-11UD2-1126-SM-5EQM6	Artery - Coronary	Blood Vessel	male	GTEX-11UD2	GTEX
GTEX-11UD2-1226-SM-5EQMI	Esophagus - Muscularis	Esophagus	male	GTEX-11UD2	GTEX
GTEX-11UD2-1526-SM-5EQLQ	Esophagus - Gastroesophageal Junction	Esophagus	male	GTEX-11UD2	GTEX
GTEX-11UD2-1626-SM-5EQM3	Liver	Liver	male	GTEX-11UD2	GTEX
GTEX-11UD2-2526-SM-5CVNU	Skin - Not Sun Exposed (Suprapubic)	Skin	male	GTEX-11UD2	GTEX
GTEX-11UD2-2826-SM-5GU6X	Testis	Testis	male	GTEX-11UD2	GTEX
GTEX-11VI4-0001-SM-5S2OI	Cells - EBV-transformed lymphocytes	Blood	female	GTEX-11VI4	GTEX
GTEX-11VI4-0006-SM-5N9D8	Whole Blood	Blood	female	GTEX-11VI4	GTEX
GTEX-11VI4-0126-SM-5GU6Z	Spleen	Spleen	female	GTEX-11VI4	GTEX
GTEX-11VI4-0226-SM-5GU6C	Thyroid	Thyroid	female	GTEX-11VI4	GTEX
GTEX-11VI4-0326-SM-5EQ6L	Stomach	Stomach	female	GTEX-11VI4	GTEX
GTEX-11VI4-0426-SM-5EGHZ	Pancreas	Pancreas	female	GTEX-11VI4	GTEX
GTEX-11VI4-0526-SM-5EQ48	Esophagus - Mucosa	Esophagus	female	GTEX-11VI4	GTEX
GTEX-11VI4-0626-SM-5EQLO	Esophagus - Muscularis	Esophagus	female	GTEX-11VI4	GTEX
GTEX-11VI4-0726-SM-5GU5B	Vagina	Vagina	female	GTEX-11VI4	GTEX
GTEX-11VI4-0826-SM-5GU5N	Esophagus - Gastroesophageal Junction	Esophagus	female	GTEX-11VI4	GTEX
GTEX-11VI4-1026-SM-5EQM1	Ovary	Ovary	female	GTEX-11VI4	GTEX
GTEX-11VI4-1126-SM-5EQMD	Skin - Not Sun Exposed (Suprapubic)	Skin	female	GTEX-11VI4	GTEX
GTEX-11VI4-1226-SM-5EQMP	Adipose - Visceral (Omentum)	Adipose Tissue	female	GTEX-11VI4	GTEX
GTEX-11VI4-1426-SM-5GU6O	Colon - Sigmoid	Colon	female	GTEX-11VI4	GTEX
GTEX-11VI4-1526-SM-5EQKC	Colon - Transverse	Colon	female	GTEX-11VI4	GTEX
GTEX-11VI4-1626-SM-5EQKO	Small Intestine - Terminal Ileum	Small Intestine	female	GTEX-11VI4	GTEX
GTEX-11VI4-1726-SM-5CVLH	Skin - Sun Exposed (Lower leg)	Skin	female	GTEX-11VI4	GTEX
GTEX-11VI4-1926-SM-5CVLI	Muscle - Skeletal	Muscle	female	GTEX-11VI4	GTEX
GTEX-11VI4-2026-SM-5CVLJ	Artery - Tibial	Blood Vessel	female	GTEX-11VI4	GTEX
GTEX-11VI4-2126-SM-5EGI1	Nerve - Tibial	Nerve	female	GTEX-11VI4	GTEX
GTEX-11WQC-0006-SM-5LZVP	Whole Blood	Blood	male	GTEX-11WQC	GTEX
GTEX-11WQC-0008-SM-5SI6R	Cells - Transformed fibroblasts	Skin	male	GTEX-11WQC	GTEX
GTEX-11WQC-0011-R10a-SM-57WCT	Brain - Frontal Cortex (BA9)	Brain	male	GTEX-11WQC	GTEX
GTEX-11WQC-0011-R11b-SM-57WD6	Brain - Cerebellar Hemisphere	Brain	male	GTEX-11WQC	GTEX
GTEX-11WQC-0011-R5a-SM-5BC74	Brain - Caudate (basal ganglia)	Brain	male	GTEX-11WQC	GTEX
GTEX-11WQC-0011-R6a-SM-5BC77	Brain - Nucleus accumbens (basal ganglia)	Brain	male	GTEX-11WQC	GTEX
GTEX-11WQC-0011-R7b-SM-5BC7A	Brain - Putamen (basal ganglia)	Brain	male	GTEX-11WQC	GTEX
GTEX-11WQC-0011-R8b-SM-57WCH	Brain - Hypothalamus	Brain	male	GTEX-11WQC	GTEX
GTEX-11WQC-0626-SM-5EQMF	Lung	Lung	male	GTEX-11WQC	GTEX
GTEX-11WQC-0726-SM-5EQMR	Liver	Liver	male	GTEX-11WQC	GTEX
GTEX-11WQC-1726-SM-5GU4W	Breast - Mammary Tissue	Breast	male	GTEX-11WQC	GTEX
GTEX-11WQC-1826-SM-5GU59	Skin - Not Sun Exposed (Suprapubic)	Skin	male	GTEX-11WQC	GTEX
GTEX-11WQC-2326-SM-5EQKE	Testis	Testis	male	GTEX-11WQC	GTEX
GTEX-11WQC-2426-SM-5EQKQ	Adipose - Subcutaneous	Adipose Tissue	male	GTEX-11WQC	GTEX
GTEX-11WQC-2526-SM-5CVLE	Skin - Sun Exposed (Lower leg)	Skin	male	GTEX-11WQC	GTEX
GTEX-11WQC-2626-SM-5CVLF	Muscle - Skeletal	Muscle	male	GTEX-11WQC	GTEX
GTEX-11WQC-2726-SM-5CVLG	Artery - Tibial	Blood Vessel	male	GTEX-11WQC	GTEX
GTEX-11WQC-2826-SM-5GU7A	Nerve - Tibial	Nerve	male	GTEX-11WQC	GTEX
GTEX-11WQK-0005-SM-5O9AV	Whole Blood	Blood	male	GTEX-11WQK	GTEX
GTEX-11WQK-0008-SM-5SI6T	Cells - Transformed fibroblasts	Skin	male	GTEX-11WQK	GTEX
GTEX-11WQK-0011-R10a-SM-5BC6R	Brain - Frontal Cortex (BA9)	Brain	male	GTEX-11WQK	GTEX
GTEX-11WQK-0011-R11a-SM-5BC6W	Brain - Cerebellar Hemisphere	Brain	male	GTEX-11WQK	GTEX
GTEX-11WQK-0011-R8a-SM-5BC7C	Brain - Hypothalamus	Brain	male	GTEX-11WQK	GTEX
GTEX-11WQK-0011-R9b-SM-5BC6N	Brain - Spinal cord (cervical c-1)	Brain	male	GTEX-11WQK	GTEX
GTEX-11WQK-0226-SM-5EQLI	Heart - Atrial Appendage	Heart	male	GTEX-11WQK	GTEX
GTEX-11WQK-0326-SM-5EQL1	Artery - Aorta	Blood Vessel	male	GTEX-11WQK	GTEX
GTEX-11WQK-0526-SM-5EQLD	Skin - Sun Exposed (Lower leg)	Skin	male	GTEX-11WQK	GTEX
GTEX-11WQK-0726-SM-5GU71	Muscle - Skeletal	Muscle	male	GTEX-11WQK	GTEX
GTEX-11WQK-1026-SM-5EQLX	Skin - Not Sun Exposed (Suprapubic)	Skin	male	GTEX-11WQK	GTEX
GTEX-11WQK-1226-SM-5GU5Z	Lung	Lung	male	GTEX-11WQK	GTEX
GTEX-11WQK-1526-SM-5EGKN	Adipose - Visceral (Omentum)	Adipose Tissue	male	GTEX-11WQK	GTEX
GTEX-11WQK-1826-SM-5EQM2	Esophagus - Muscularis	Esophagus	male	GTEX-11WQK	GTEX
GTEX-11WQK-2126-SM-5EQME	Colon - Transverse	Colon	male	GTEX-11WQK	GTEX
GTEX-11WQK-2226-SM-5CVL7	Esophagus - Gastroesophageal Junction	Esophagus	male	GTEX-11WQK	GTEX
GTEX-11WQK-2326-SM-5GU4Z	Small Intestine - Terminal Ileum	Small Intestine	male	GTEX-11WQK	GTEX
GTEX-11WQK-2426-SM-5GU5C	Breast - Mammary Tissue	Breast	male	GTEX-11WQK	GTEX
GTEX-11WQK-2526-SM-5CVL8	Colon - Sigmoid	Colon	male	GTEX-11WQK	GTEX
GTEX-11WQK-2626-SM-5EQ4K	Stomach	Stomach	male	GTEX-11WQK	GTEX
GTEX-11WQK-2726-SM-5EQMU	Prostate	Prostate	male	GTEX-11WQK	GTEX
GTEX-11WQK-2826-SM-5EQKH	Testis	Testis	male	GTEX-11WQK	GTEX
GTEX-11WQK-2926-SM-5EQKT	Minor Salivary Gland	Salivary Gland	male	GTEX-11WQK	GTEX
GTEX-11WQK-3026-SM-5EQL6	Brain - Cortex	Brain	male	GTEX-11WQK	GTEX
GTEX-11WQK-3126-SM-5EGI2	Brain - Cerebellum	Brain	male	GTEX-11WQK	GTEX
GTEX-11WQK-3226-SM-5EGI3	Pituitary	Pituitary	male	GTEX-11WQK	GTEX
GTEX-11XUK-0005-SM-5LU9F	Whole Blood	Blood	female	GTEX-11XUK	GTEX
GTEX-11XUK-0008-SM-5S2WD	Cells - Transformed fibroblasts	Skin	female	GTEX-11XUK	GTEX
GTEX-11XUK-0126-SM-5CVLK	Adrenal Gland	Adrenal Gland	female	GTEX-11XUK	GTEX
GTEX-11XUK-0226-SM-5EQLW	Thyroid	Thyroid	female	GTEX-11XUK	GTEX
GTEX-11XUK-0426-SM-5EQML	Spleen	Spleen	female	GTEX-11XUK	GTEX
GTEX-11XUK-0626-SM-5N9ES	Pancreas	Pancreas	female	GTEX-11XUK	GTEX
GTEX-11XUK-0726-SM-5EQMX	Esophagus - Muscularis	Esophagus	female	GTEX-11XUK	GTEX
GTEX-11XUK-0826-SM-5GU6P	Esophagus - Mucosa	Esophagus	female	GTEX-11XUK	GTEX
GTEX-11XUK-0926-SM-5EQL3	Esophagus - Gastroesophageal Junction	Esophagus	female	GTEX-11XUK	GTEX
GTEX-11XUK-1326-SM-5EQM4	Vagina	Vagina	female	GTEX-11XUK	GTEX
GTEX-11XUK-1426-SM-5EQMG	Small Intestine - Terminal Ileum	Small Intestine	female	GTEX-11XUK	GTEX
GTEX-11XUK-1626-SM-5GU5O	Ovary	Ovary	female	GTEX-11XUK	GTEX
GTEX-11XUK-1726-SM-5GU61	Adipose - Visceral (Omentum)	Adipose Tissue	female	GTEX-11XUK	GTEX
GTEX-11XUK-2026-SM-5EQLF	Skin - Sun Exposed (Lower leg)	Skin	female	GTEX-11XUK	GTEX
GTEX-11XUK-2126-SM-5EQLR	Adipose - Subcutaneous	Adipose Tissue	female	GTEX-11XUK	GTEX
GTEX-11XUK-2226-SM-5CVLL	Muscle - Skeletal	Muscle	female	GTEX-11XUK	GTEX
GTEX-11XUK-2326-SM-5CVLM	Nerve - Tibial	Nerve	female	GTEX-11XUK	GTEX
GTEX-11XUK-2426-SM-5GU72	Artery - Tibial	Blood Vessel	female	GTEX-11XUK	GTEX
GTEX-11ZTS-0005-SM-5NQ8A	Whole Blood	Blood	female	GTEX-11ZTS	GTEX
GTEX-11ZTS-0008-SM-5S2VC	Cells - Transformed fibroblasts	Skin	female	GTEX-11ZTS	GTEX
GTEX-11ZTS-0011-R1a-SM-5BC71	Brain - Hippocampus	Brain	female	GTEX-11ZTS	GTEX
GTEX-11ZTS-0011-R2b-SM-5BC75	Brain - Substantia nigra	Brain	female	GTEX-11ZTS	GTEX
GTEX-11ZTS-0011-R3a-SM-5BC78	Brain - Anterior cingulate cortex (BA24)	Brain	female	GTEX-11ZTS	GTEX
GTEX-11ZTS-0011-R8a-SM-57WDI	Brain - Hypothalamus	Brain	female	GTEX-11ZTS	GTEX
GTEX-11ZTS-0126-SM-5EQ6M	Skin - Sun Exposed (Lower leg)	Skin	female	GTEX-11ZTS	GTEX
GTEX-11ZTS-0226-SM-5EQKD	Adipose - Subcutaneous	Adipose Tissue	female	GTEX-11ZTS	GTEX
GTEX-11ZTS-0326-SM-5EQKP	Artery - Tibial	Blood Vessel	female	GTEX-11ZTS	GTEX
GTEX-11ZTS-0526-SM-5CVL9	Muscle - Skeletal	Muscle	female	GTEX-11ZTS	GTEX
GTEX-11ZTS-0826-SM-5EQ49	Artery - Aorta	Blood Vessel	female	GTEX-11ZTS	GTEX
GTEX-11ZTS-1026-SM-5LU8O	Artery - Coronary	Blood Vessel	female	GTEX-11ZTS	GTEX
GTEX-11ZTS-1126-SM-5LU9X	Thyroid	Thyroid	female	GTEX-11ZTS	GTEX
GTEX-11ZTS-1226-SM-5EQMQ	Lung	Lung	female	GTEX-11ZTS	GTEX
GTEX-11ZTS-1326-SM-5EQMA	Adipose - Visceral (Omentum)	Adipose Tissue	female	GTEX-11ZTS	GTEX
GTEX-11ZTS-1426-SM-5EQMM	Liver	Liver	female	GTEX-11ZTS	GTEX
GTEX-11ZTS-1526-SM-5N9G7	Colon - Sigmoid	Colon	female	GTEX-11ZTS	GTEX
GTEX-11ZTS-1926-SM-5CVLA	Ovary	Ovary	female	GTEX-11ZTS	GTEX
GTEX-11ZTS-2326-SM-5EQMY	Uterus	Uterus	female	GTEX-11ZTS	GTEX
GTEX-11ZTS-2626-SM-5EGIC	Esophagus - Mucosa	Esophagus	female	GTEX-11ZTS	GTEX
GTEX-11ZTS-2726-SM-5EQLU	Esophagus - Gastroesophageal Junction	Esophagus	female	GTEX-11ZTS	GTEX
GTEX-11ZTS-3026-SM-5EQM7	Minor Salivary Gland	Salivary Gland	female	GTEX-11ZTS	GTEX
GTEX-11ZTS-3226-SM-5EGID	Brain - Cerebellum	Brain	female	GTEX-11ZTS	GTEX
GTEX-11ZTS-3326-SM-5LU9Y	Pituitary	Pituitary	female	GTEX-11ZTS	GTEX
GTEX-11ZTT-0002-SM-5S2PA	Cells - EBV-transformed lymphocytes	Blood	female	GTEX-11ZTT	GTEX
GTEX-11ZTT-0006-SM-5N9FX	Whole Blood	Blood	female	GTEX-11ZTT	GTEX
GTEX-11ZTT-0008-SM-5S2TZ	Cells - Transformed fibroblasts	Skin	female	GTEX-11ZTT	GTEX
GTEX-11ZTT-0426-SM-5EQLK	Artery - Coronary	Blood Vessel	female	GTEX-11ZTT	GTEX
GTEX-11ZTT-0526-SM-5EQLA	Heart - Atrial Appendage	Heart	female	GTEX-11ZTT	GTEX
GTEX-11ZTT-0626-SM-5EQLM	Lung	Lung	female	GTEX-11ZTT	GTEX
GTEX-11ZTT-0926-SM-5EQMS	Esophagus - Muscularis	Esophagus	female	GTEX-11ZTT	GTEX
GTEX-11ZTT-1026-SM-5EQKF	Thyroid	Thyroid	female	GTEX-11ZTT	GTEX
GTEX-11ZTT-1626-SM-5EQKR	Colon - Sigmoid	Colon	female	GTEX-11ZTT	GTEX
GTEX-11ZTT-1726-SM-5EQL4	Uterus	Uterus	female	GTEX-11ZTT	GTEX
GTEX-11ZTT-1826-SM-5CVLN	Ovary	Ovary	female	GTEX-11ZTT	GTEX
GTEX-11ZTT-2126-SM-5CVLO	Skin - Not Sun Exposed (Suprapubic)	Skin	female	GTEX-11ZTT	GTEX
GTEX-11ZTT-2226-SM-5CVLP	Minor Salivary Gland	Salivary Gland	female	GTEX-11ZTT	GTEX
GTEX-11ZTT-2326-SM-5EQLG	Breast - Mammary Tissue	Breast	female	GTEX-11ZTT	GTEX
GTEX-11ZTT-2426-SM-5EQLS	Skin - Sun Exposed (Lower leg)	Skin	female	GTEX-11ZTT	GTEX
GTEX-11ZTT-2526-SM-5EQM9	Adipose - Subcutaneous	Adipose Tissue	female	GTEX-11ZTT	GTEX
GTEX-11ZTT-2626-SM-5EQKK	Muscle - Skeletal	Muscle	female	GTEX-11ZTT	GTEX
GTEX-11ZU8-0005-SM-5PNU5	Whole Blood	Blood	male	GTEX-11ZU8	GTEX
GTEX-11ZU8-0008-SM-5S2VO	Cells - Transformed fibroblasts	Skin	male	GTEX-11ZU8	GTEX
GTEX-11ZU8-0011-R3a-SM-5BC6U	Brain - Anterior cingulate cortex (BA24)	Brain	male	GTEX-11ZU8	GTEX
GTEX-11ZU8-0011-R4a-SM-5BC6Y	Brain - Amygdala	Brain	male	GTEX-11ZU8	GTEX
GTEX-11ZU8-0126-SM-5EQ58	Skin - Not Sun Exposed (Suprapubic)	Skin	male	GTEX-11ZU8	GTEX
GTEX-11ZU8-1126-SM-5EQ5K	Colon - Sigmoid	Colon	male	GTEX-11ZU8	GTEX
GTEX-11ZU8-1526-SM-5EGHX	Esophagus - Mucosa	Esophagus	male	GTEX-11ZU8	GTEX
GTEX-11ZU8-2326-SM-5EQMJ	Muscle - Skeletal	Muscle	male	GTEX-11ZU8	GTEX
GTEX-11ZU8-2426-SM-5EQMV	Adipose - Subcutaneous	Adipose Tissue	male	GTEX-11ZU8	GTEX
GTEX-11ZU8-2526-SM-5EQKI	Skin - Sun Exposed (Lower leg)	Skin	male	GTEX-11ZU8	GTEX
GTEX-11ZU8-2626-SM-5EQLL	Nerve - Tibial	Nerve	male	GTEX-11ZU8	GTEX
GTEX-11ZUS-0006-SM-5O9AJ	Whole Blood	Blood	male	GTEX-11ZUS	GTEX
GTEX-11ZUS-0008-SM-5S2UO	Cells - Transformed fibroblasts	Skin	male	GTEX-11ZUS	GTEX
GTEX-11ZUS-0011-R10b-SM-5BC79	Brain - Frontal Cortex (BA9)	Brain	male	GTEX-11ZUS	GTEX
GTEX-11ZUS-0011-R11b-SM-5BC7B	Brain - Cerebellar Hemisphere	Brain	male	GTEX-11ZUS	GTEX
GTEX-11ZUS-0011-R8a-SM-5BC73	Brain - Hypothalamus	Brain	male	GTEX-11ZUS	GTEX
GTEX-11ZUS-0011-R9b-SM-5BC76	Brain - Spinal cord (cervical c-1)	Brain	male	GTEX-11ZUS	GTEX
GTEX-11ZUS-0126-SM-5EQM5	Lung	Lung	male	GTEX-11ZUS	GTEX
GTEX-11ZUS-0226-SM-5FQT8	Heart - Left Ventricle	Heart	male	GTEX-11ZUS	GTEX
GTEX-11ZUS-0326-SM-5EQ4W	Heart - Atrial Appendage	Heart	male	GTEX-11ZUS	GTEX
GTEX-11ZUS-0526-SM-59884	Artery - Coronary	Blood Vessel	male	GTEX-11ZUS	GTEX
GTEX-11ZUS-0626-SM-59885	Skin - Sun Exposed (Lower leg)	Skin	male	GTEX-11ZUS	GTEX
GTEX-11ZUS-0726-SM-59886	Adipose - Subcutaneous	Adipose Tissue	male	GTEX-11ZUS	GTEX
GTEX-11ZUS-0826-SM-5FQUY	Breast - Mammary Tissue	Breast	male	GTEX-11ZUS	GTEX
GTEX-11ZUS-0926-SM-5FQSY	Esophagus - Muscularis	Esophagus	male	GTEX-11ZUS	GTEX
GTEX-11ZUS-1226-SM-5FQU8	Nerve - Tibial	Nerve	male	GTEX-11ZUS	GTEX
GTEX-11ZUS-1326-SM-5FQUC	Artery - Tibial	Blood Vessel	male	GTEX-11ZUS	GTEX
GTEX-11ZUS-1426-SM-5FQSP	Muscle - Skeletal	Muscle	male	GTEX-11ZUS	GTEX
GTEX-11ZUS-1826-SM-5FQTR	Adipose - Visceral (Omentum)	Adipose Tissue	male	GTEX-11ZUS	GTEX
GTEX-11ZUS-2126-SM-5N9E6	Prostate	Prostate	male	GTEX-11ZUS	GTEX
GTEX-11ZUS-2526-SM-59872	Liver	Liver	male	GTEX-11ZUS	GTEX
GTEX-11ZUS-2626-SM-5FQUR	Skin - Not Sun Exposed (Suprapubic)	Skin	male	GTEX-11ZUS	GTEX
GTEX-11ZUS-2726-SM-5FQUA	Testis	Testis	male	GTEX-11ZUS	GTEX
GTEX-11ZUS-2826-SM-5EQKW	Brain - Cerebellum	Brain	male	GTEX-11ZUS	GTEX
GTEX-11ZUS-2926-SM-5FQSL	Brain - Cortex	Brain	male	GTEX-11ZUS	GTEX
GTEX-11ZUS-3026-SM-5EGI4	Pituitary	Pituitary	male	GTEX-11ZUS	GTEX
GTEX-11ZVC-0011-R1b-SM-5BC6M	Brain - Hippocampus	Brain	female	GTEX-11ZVC	GTEX
GTEX-11ZVC-0011-R3a-SM-5BC6V	Brain - Anterior cingulate cortex (BA24)	Brain	female	GTEX-11ZVC	GTEX
GTEX-11ZVC-0011-R4a-SM-5BC6Z	Brain - Amygdala	Brain	female	GTEX-11ZVC	GTEX
GTEX-11ZVC-0011-R9a-SM-57WC5	Brain - Spinal cord (cervical c-1)	Brain	female	GTEX-11ZVC	GTEX
GTEX-11ZVC-0126-SM-5986G	Thyroid	Thyroid	female	GTEX-11ZVC	GTEX
GTEX-11ZVC-0326-SM-5CVLC	Artery - Aorta	Blood Vessel	female	GTEX-11ZVC	GTEX
GTEX-11ZVC-0426-SM-5CVLD	Heart - Left Ventricle	Heart	female	GTEX-11ZVC	GTEX
GTEX-11ZVC-0526-SM-5N9G1	Heart - Atrial Appendage	Heart	female	GTEX-11ZVC	GTEX
GTEX-11ZVC-0726-SM-5FQT9	Liver	Liver	female	GTEX-11ZVC	GTEX
GTEX-11ZVC-1426-SM-5EGGA	Ovary	Ovary	female	GTEX-11ZVC	GTEX
GTEX-11ZVC-2126-SM-5EGJ1	Colon - Transverse	Colon	female	GTEX-11ZVC	GTEX
GTEX-11ZVC-2526-SM-5FQTE	Skin - Sun Exposed (Lower leg)	Skin	female	GTEX-11ZVC	GTEX
GTEX-11ZVC-2626-SM-5FQTA	Adipose - Subcutaneous	Adipose Tissue	female	GTEX-11ZVC	GTEX
GTEX-11ZVC-2726-SM-5FQSZ	Muscle - Skeletal	Muscle	female	GTEX-11ZVC	GTEX
GTEX-11ZVC-2826-SM-5FQTC	Nerve - Tibial	Nerve	female	GTEX-11ZVC	GTEX
GTEX-11ZVC-2926-SM-5986H	Artery - Tibial	Blood Vessel	female	GTEX-11ZVC	GTEX
GTEX-11ZVC-3026-SM-59HJM	Brain - Cerebellum	Brain	female	GTEX-11ZVC	GTEX
GTEX-11ZVC-3226-SM-5FQV1	Pituitary	Pituitary	female	GTEX-11ZVC	GTEX
GTEX-1211K-0001-SM-5S2P9	Cells - EBV-transformed lymphocytes	Blood	female	GTEX-1211K	GTEX
GTEX-1211K-0006-SM-5MR53	Whole Blood	Blood	female	GTEX-1211K	GTEX
GTEX-1211K-0008-SM-5S2W1	Cells - Transformed fibroblasts	Skin	female	GTEX-1211K	GTEX
GTEX-1211K-0126-SM-59HJE	Adrenal Gland	Adrenal Gland	female	GTEX-1211K	GTEX
GTEX-1211K-0226-SM-59HJY	Heart - Atrial Appendage	Heart	female	GTEX-1211K	GTEX
GTEX-1211K-0326-SM-5FQT1	Artery - Aorta	Blood Vessel	female	GTEX-1211K	GTEX
GTEX-1211K-0426-SM-5FQTP	Spleen	Spleen	female	GTEX-1211K	GTEX
GTEX-1211K-0626-SM-5FQUZ	Heart - Left Ventricle	Heart	female	GTEX-1211K	GTEX
GTEX-1211K-0726-SM-5FQUW	Thyroid	Thyroid	female	GTEX-1211K	GTEX
GTEX-1211K-0826-SM-5FQUP	Lung	Lung	female	GTEX-1211K	GTEX
GTEX-1211K-0926-SM-5FQTL	Esophagus - Mucosa	Esophagus	female	GTEX-1211K	GTEX
GTEX-1211K-1026-SM-5EQ4B	Esophagus - Muscularis	Esophagus	female	GTEX-1211K	GTEX
GTEX-1211K-1126-SM-5EGGB	Pancreas	Pancreas	female	GTEX-1211K	GTEX
GTEX-1211K-1226-SM-5EQ4N	Adipose - Visceral (Omentum)	Adipose Tissue	female	GTEX-1211K	GTEX
GTEX-1211K-1326-SM-5FQV2	Esophagus - Gastroesophageal Junction	Esophagus	female	GTEX-1211K	GTEX
GTEX-1211K-1426-SM-5FQTF	Stomach	Stomach	female	GTEX-1211K	GTEX
GTEX-1211K-1526-SM-5FQU4	Skin - Not Sun Exposed (Suprapubic)	Skin	female	GTEX-1211K	GTEX
GTEX-1211K-1726-SM-5FQUJ	Colon - Transverse	Colon	female	GTEX-1211K	GTEX
GTEX-1211K-1826-SM-5EGJ2	Colon - Sigmoid	Colon	female	GTEX-1211K	GTEX
GTEX-1211K-1926-SM-5EQLB	Breast - Mammary Tissue	Breast	female	GTEX-1211K	GTEX
GTEX-1211K-2026-SM-5EQ4Z	Skin - Sun Exposed (Lower leg)	Skin	female	GTEX-1211K	GTEX
GTEX-1211K-2126-SM-59HJZ	Muscle - Skeletal	Muscle	female	GTEX-1211K	GTEX
GTEX-1211K-2226-SM-5FQU6	Adipose - Subcutaneous	Adipose Tissue	female	GTEX-1211K	GTEX
GTEX-1211K-2326-SM-5FQU7	Nerve - Tibial	Nerve	female	GTEX-1211K	GTEX
GTEX-1211K-2426-SM-59HL8	Artery - Tibial	Blood Vessel	female	GTEX-1211K	GTEX
GTEX-12126-0006-SM-5O9B8	Whole Blood	Blood	male	GTEX-12126	GTEX
GTEX-12126-0008-SM-5S2UC	Cells - Transformed fibroblasts	Skin	male	GTEX-12126	GTEX
GTEX-12126-0011-R10b-SM-5BC6T	Brain - Frontal Cortex (BA9)	Brain	male	GTEX-12126	GTEX
GTEX-12126-0011-R11a-SM-5BC6X	Brain - Cerebellar Hemisphere	Brain	male	GTEX-12126	GTEX
GTEX-12126-0011-R9b-SM-5BC6P	Brain - Spinal cord (cervical c-1)	Brain	male	GTEX-12126	GTEX
GTEX-12126-0326-SM-5PNW3	Skin - Sun Exposed (Lower leg)	Skin	male	GTEX-12126	GTEX
GTEX-12126-0426-SM-5Q5AP	Adipose - Subcutaneous	Adipose Tissue	male	GTEX-12126	GTEX
GTEX-12126-0526-SM-5PNW4	Muscle - Skeletal	Muscle	male	GTEX-12126	GTEX
GTEX-12126-0626-SM-5Q5AQ	Nerve - Tibial	Nerve	male	GTEX-12126	GTEX
GTEX-12126-0726-SM-5FQTX	Artery - Tibial	Blood Vessel	male	GTEX-12126	GTEX
GTEX-12126-0826-SM-5FQTZ	Skin - Not Sun Exposed (Suprapubic)	Skin	male	GTEX-12126	GTEX
GTEX-12126-0926-SM-5FQTW	Brain - Cerebellum	Brain	male	GTEX-12126	GTEX
GTEX-12126-1026-SM-5P9JJ	Brain - Cortex	Brain	male	GTEX-12126	GTEX
GTEX-12126-1126-SM-5P9GP	Pituitary	Pituitary	male	GTEX-12126	GTEX
GTEX-1212Z-0002-SM-5SI6W	Cells - EBV-transformed lymphocytes	Blood	male	GTEX-1212Z	GTEX
GTEX-1212Z-0006-SM-5NQ8M	Whole Blood	Blood	male	GTEX-1212Z	GTEX
GTEX-1212Z-0011-R1b-SM-5BC72	Brain - Hippocampus	Brain	male	GTEX-1212Z	GTEX
GTEX-1212Z-0126-SM-59HK4	Skin - Not Sun Exposed (Suprapubic)	Skin	male	GTEX-1212Z	GTEX
GTEX-1212Z-0226-SM-59HLF	Liver	Liver	male	GTEX-1212Z	GTEX
GTEX-1212Z-0326-SM-5FQSJ	Testis	Testis	male	GTEX-1212Z	GTEX
GTEX-1212Z-0426-SM-5FQT6	Thyroid	Thyroid	male	GTEX-1212Z	GTEX
GTEX-1212Z-0526-SM-5FQSQ	Adipose - Visceral (Omentum)	Adipose Tissue	male	GTEX-1212Z	GTEX
GTEX-1212Z-0626-SM-5FQTB	Heart - Left Ventricle	Heart	male	GTEX-1212Z	GTEX
GTEX-1212Z-0726-SM-5EGI5	Heart - Atrial Appendage	Heart	male	GTEX-1212Z	GTEX
GTEX-1212Z-0826-SM-5EQ51	Artery - Aorta	Blood Vessel	male	GTEX-1212Z	GTEX
GTEX-1212Z-1026-SM-5EGJ8	Lung	Lung	male	GTEX-1212Z	GTEX
GTEX-1212Z-1826-SM-5FQSH	Colon - Sigmoid	Colon	male	GTEX-1212Z	GTEX
GTEX-1212Z-2026-SM-5N9EA	Esophagus - Muscularis	Esophagus	male	GTEX-1212Z	GTEX
GTEX-1212Z-2126-SM-5FQTM	Esophagus - Mucosa	Esophagus	male	GTEX-1212Z	GTEX
GTEX-1212Z-2426-SM-5EQ5D	Adipose - Subcutaneous	Adipose Tissue	male	GTEX-1212Z	GTEX
GTEX-1212Z-2526-SM-5EGKP	Skin - Sun Exposed (Lower leg)	Skin	male	GTEX-1212Z	GTEX
GTEX-1212Z-2726-SM-5EQ59	Nerve - Tibial	Nerve	male	GTEX-1212Z	GTEX
GTEX-1212Z-2826-SM-59HJ5	Artery - Tibial	Blood Vessel	male	GTEX-1212Z	GTEX
GTEX-1212Z-2926-SM-59HKV	Pituitary	Pituitary	male	GTEX-1212Z	GTEX
GTEX-12584-0005-SM-5N9GM	Whole Blood	Blood	male	GTEX-12584	GTEX
GTEX-12584-0011-R6a-SM-5NQ7C	Brain - Nucleus accumbens (basal ganglia)	Brain	male	GTEX-12584	GTEX
GTEX-12584-0126-SM-5EGKQ	Skin - Sun Exposed (Lower leg)	Skin	male	GTEX-12584	GTEX
GTEX-12584-0226-SM-5EQL5	Adipose - Subcutaneous	Adipose Tissue	male	GTEX-12584	GTEX
GTEX-12584-0326-SM-59HK2	Nerve - Tibial	Nerve	male	GTEX-12584	GTEX
GTEX-12584-0426-SM-5FQTT	Artery - Tibial	Blood Vessel	male	GTEX-12584	GTEX
GTEX-12584-0526-SM-5FQTS	Muscle - Skeletal	Muscle	male	GTEX-12584	GTEX
GTEX-12584-0726-SM-5FQTK	Skin - Not Sun Exposed (Suprapubic)	Skin	male	GTEX-12584	GTEX
GTEX-12584-0826-SM-5FQSK	Thyroid	Thyroid	male	GTEX-12584	GTEX
GTEX-12584-0926-SM-5FQTN	Heart - Left Ventricle	Heart	male	GTEX-12584	GTEX
GTEX-12584-1026-SM-59HK3	Heart - Atrial Appendage	Heart	male	GTEX-12584	GTEX
GTEX-12584-1426-SM-5EGJ9	Lung	Lung	male	GTEX-12584	GTEX
GTEX-12584-2126-SM-5FQUM	Adipose - Visceral (Omentum)	Adipose Tissue	male	GTEX-12584	GTEX
GTEX-12584-3126-SM-5EGKR	Pituitary	Pituitary	male	GTEX-12584	GTEX
GTEX-12696-0002-SM-5SI6U	Cells - EBV-transformed lymphocytes	Blood	male	GTEX-12696	GTEX
GTEX-12696-0005-SM-5LZYS	Whole Blood	Blood	male	GTEX-12696	GTEX
GTEX-12696-0126-SM-5EQ4L	Skin - Not Sun Exposed (Suprapubic)	Skin	male	GTEX-12696	GTEX
GTEX-12696-0226-SM-5EGL3	Testis	Testis	male	GTEX-12696	GTEX
GTEX-12696-0326-SM-5EGL4	Thyroid	Thyroid	male	GTEX-12696	GTEX
GTEX-12696-0426-SM-5EGL5	Artery - Aorta	Blood Vessel	male	GTEX-12696	GTEX
GTEX-12696-0526-SM-5EQ3Z	Artery - Coronary	Blood Vessel	male	GTEX-12696	GTEX
GTEX-12696-0626-SM-5EGGD	Adrenal Gland	Adrenal Gland	male	GTEX-12696	GTEX
GTEX-12696-0826-SM-5EGGE	Liver	Liver	male	GTEX-12696	GTEX
GTEX-12696-0926-SM-5FQTV	Kidney - Cortex	Kidney	male	GTEX-12696	GTEX
GTEX-12696-1026-SM-5FQUV	Lung	Lung	male	GTEX-12696	GTEX
GTEX-12696-1126-SM-5FQTI	Heart - Left Ventricle	Heart	male	GTEX-12696	GTEX
GTEX-12696-1226-SM-5FQSM	Heart - Atrial Appendage	Heart	male	GTEX-12696	GTEX
GTEX-12696-1326-SM-5FQTJ	Esophagus - Mucosa	Esophagus	male	GTEX-12696	GTEX
GTEX-12696-1426-SM-5EGJ6	Esophagus - Muscularis	Esophagus	male	GTEX-12696	GTEX
GTEX-12696-1526-SM-5EGL6	Esophagus - Gastroesophageal Junction	Esophagus	male	GTEX-12696	GTEX
GTEX-12696-1726-SM-5EQLH	Stomach	Stomach	male	GTEX-12696	GTEX
GTEX-12696-1826-SM-5EGJS	Adipose - Visceral (Omentum)	Adipose Tissue	male	GTEX-12696	GTEX
GTEX-12696-1926-SM-5EGJT	Colon - Sigmoid	Colon	male	GTEX-12696	GTEX
GTEX-12696-2226-SM-5EQ65	Prostate	Prostate	male	GTEX-12696	GTEX
GTEX-12696-2426-SM-5EQ6H	Skin - Sun Exposed (Lower leg)	Skin	male	GTEX-12696	GTEX
GTEX-12696-2526-SM-5EQLN	Adipose - Subcutaneous	Adipose Tissue	male	GTEX-12696	GTEX
GTEX-12696-2626-SM-5EQ44	Nerve - Tibial	Nerve	male	GTEX-12696	GTEX
GTEX-12696-2726-SM-5FQUL	Artery - Tibial	Blood Vessel	male	GTEX-12696	GTEX
GTEX-12696-2826-SM-5FQTY	Muscle - Skeletal	Muscle	male	GTEX-12696	GTEX
GTEX-12696-2926-SM-5FQTG	Brain - Cortex	Brain	male	GTEX-12696	GTEX
GTEX-12696-3026-SM-5FQTU	Brain - Cerebellum	Brain	male	GTEX-12696	GTEX
GTEX-12696-3126-SM-5FQUX	Pituitary	Pituitary	male	GTEX-12696	GTEX
GTEX-1269C-0003-SM-5S2PB	Cells - EBV-transformed lymphocytes	Blood	female	GTEX-1269C	GTEX
GTEX-1269C-0005-SM-5N9CJ	Whole Blood	Blood	female	GTEX-1269C	GTEX
GTEX-1269C-0011-R4b-SM-5P9ES	Brain - Amygdala	Brain	female	GTEX-1269C	GTEX
GTEX-1269C-0126-SM-5EQ5L	Skin - Not Sun Exposed (Suprapubic)	Skin	female	GTEX-1269C	GTEX
GTEX-1269C-0226-SM-5EGKS	Thyroid	Thyroid	female	GTEX-1269C	GTEX
GTEX-1269C-0626-SM-5FQSS	Liver	Liver	female	GTEX-1269C	GTEX
GTEX-1269C-0826-SM-5N9EM	Heart - Left Ventricle	Heart	female	GTEX-1269C	GTEX
GTEX-1269C-0926-SM-5FQSR	Lung	Lung	female	GTEX-1269C	GTEX
GTEX-1269C-1026-SM-5N9EY	Esophagus - Mucosa	Esophagus	female	GTEX-1269C	GTEX
GTEX-1269C-1826-SM-5N9E1	Ovary	Ovary	female	GTEX-1269C	GTEX
GTEX-1269C-2426-SM-5FQSN	Breast - Mammary Tissue	Breast	female	GTEX-1269C	GTEX
GTEX-1269C-2526-SM-5EGJ3	Skin - Sun Exposed (Lower leg)	Skin	female	GTEX-1269C	GTEX
GTEX-1269C-2626-SM-5EQ5C	Muscle - Skeletal	Muscle	female	GTEX-1269C	GTEX
GTEX-1269C-2726-SM-5EGJ4	Adipose - Subcutaneous	Adipose Tissue	female	GTEX-1269C	GTEX
GTEX-1269C-2826-SM-5EQ5O	Artery - Tibial	Blood Vessel	female	GTEX-1269C	GTEX
GTEX-1269C-3126-SM-5EGI6	Brain - Cerebellum	Brain	female	GTEX-1269C	GTEX
GTEX-1269C-3226-SM-5EGKT	Pituitary	Pituitary	female	GTEX-1269C	GTEX
GTEX-12BJ1-0003-SM-5SI6V	Cells - EBV-transformed lymphocytes	Blood	male	GTEX-12BJ1	GTEX
GTEX-12BJ1-0006-SM-5SIB5	Whole Blood	Blood	male	GTEX-12BJ1	GTEX
GTEX-12BJ1-0126-SM-5LU9P	Artery - Aorta	Blood Vessel	male	GTEX-12BJ1	GTEX
GTEX-12BJ1-0226-SM-5LUA2	Heart - Left Ventricle	Heart	male	GTEX-12BJ1	GTEX
GTEX-12BJ1-0326-SM-5FQUB	Heart - Atrial Appendage	Heart	male	GTEX-12BJ1	GTEX
GTEX-12BJ1-0426-SM-5FQSO	Thyroid	Thyroid	male	GTEX-12BJ1	GTEX
GTEX-12BJ1-0526-SM-5FQUD	Adrenal Gland	Adrenal Gland	male	GTEX-12BJ1	GTEX
GTEX-12BJ1-0726-SM-5EGGF	Spleen	Spleen	male	GTEX-12BJ1	GTEX
GTEX-12BJ1-0826-SM-5EQ5P	Adipose - Visceral (Omentum)	Adipose Tissue	male	GTEX-12BJ1	GTEX
GTEX-12BJ1-0926-SM-5EQ62	Skin - Not Sun Exposed (Suprapubic)	Skin	male	GTEX-12BJ1	GTEX
GTEX-12BJ1-1026-SM-5EGJA	Lung	Lung	male	GTEX-12BJ1	GTEX
GTEX-12BJ1-1126-SM-5EGGG	Pancreas	Pancreas	male	GTEX-12BJ1	GTEX
GTEX-12BJ1-1226-SM-5LUAE	Prostate	Prostate	male	GTEX-12BJ1	GTEX
GTEX-12BJ1-1326-SM-5BC5P	Testis	Testis	male	GTEX-12BJ1	GTEX
GTEX-12BJ1-1426-SM-5BC5Q	Esophagus - Muscularis	Esophagus	male	GTEX-12BJ1	GTEX
GTEX-12BJ1-1526-SM-5LUAQ	Esophagus - Gastroesophageal Junction	Esophagus	male	GTEX-12BJ1	GTEX
GTEX-12BJ1-1626-SM-5HL8Y	Esophagus - Mucosa	Esophagus	male	GTEX-12BJ1	GTEX
GTEX-12BJ1-1726-SM-5HL9B	Stomach	Stomach	male	GTEX-12BJ1	GTEX
GTEX-12BJ1-1826-SM-5HL9N	Breast - Mammary Tissue	Breast	male	GTEX-12BJ1	GTEX
GTEX-12BJ1-1926-SM-5HL9Z	Small Intestine - Terminal Ileum	Small Intestine	male	GTEX-12BJ1	GTEX
GTEX-12BJ1-2026-SM-5FQUH	Colon - Sigmoid	Colon	male	GTEX-12BJ1	GTEX
GTEX-12BJ1-2126-SM-5BC5O	Colon - Transverse	Colon	male	GTEX-12BJ1	GTEX
GTEX-12BJ1-2226-SM-5BC6G	Minor Salivary Gland	Salivary Gland	male	GTEX-12BJ1	GTEX
GTEX-12BJ1-2526-SM-5FQUE	Muscle - Skeletal	Muscle	male	GTEX-12BJ1	GTEX
GTEX-12BJ1-2626-SM-5FQUF	Nerve - Tibial	Nerve	male	GTEX-12BJ1	GTEX
GTEX-12BJ1-2726-SM-5HL9M	Artery - Tibial	Blood Vessel	male	GTEX-12BJ1	GTEX
GTEX-12C56-0002-SM-5S2PC	Cells - EBV-transformed lymphocytes	Blood	male	GTEX-12C56	GTEX
GTEX-12C56-0006-SM-5N9E9	Whole Blood	Blood	male	GTEX-12C56	GTEX
GTEX-12C56-0226-SM-5N9FB	Artery - Aorta	Blood Vessel	male	GTEX-12C56	GTEX
GTEX-12C56-0426-SM-5FQU1	Esophagus - Gastroesophageal Junction	Esophagus	male	GTEX-12C56	GTEX
GTEX-12C56-0526-SM-5FQST	Stomach	Stomach	male	GTEX-12C56	GTEX
GTEX-12C56-0626-SM-5EGGC	Colon - Transverse	Colon	male	GTEX-12C56	GTEX
GTEX-12C56-0826-SM-5EGJ5	Adipose - Visceral (Omentum)	Adipose Tissue	male	GTEX-12C56	GTEX
GTEX-12C56-1126-SM-5FQTO	Esophagus - Muscularis	Esophagus	male	GTEX-12C56	GTEX
GTEX-12C56-1226-SM-5FQSU	Esophagus - Mucosa	Esophagus	male	GTEX-12C56	GTEX
GTEX-12C56-1326-SM-5FQSV	Prostate	Prostate	male	GTEX-12C56	GTEX
GTEX-12C56-1426-SM-5FQSW	Testis	Testis	male	GTEX-12C56	GTEX
GTEX-12C56-1526-SM-5FQUQ	Skin - Not Sun Exposed (Suprapubic)	Skin	male	GTEX-12C56	GTEX
GTEX-12C56-1626-SM-5FQUO	Adipose - Subcutaneous	Adipose Tissue	male	GTEX-12C56	GTEX
GTEX-12C56-1726-SM-5EQ61	Skin - Sun Exposed (Lower leg)	Skin	male	GTEX-12C56	GTEX
GTEX-12C56-1826-SM-5EQ6D	Nerve - Tibial	Nerve	male	GTEX-12C56	GTEX
GTEX-12C56-1926-SM-5FQUG	Muscle - Skeletal	Muscle	male	GTEX-12C56	GTEX
GTEX-12C56-2026-SM-5FQSI	Artery - Tibial	Blood Vessel	male	GTEX-12C56	GTEX
GTEX-12KS4-0005-SM-5SI94	Whole Blood	Blood	male	GTEX-12KS4	GTEX
GTEX-12KS4-0126-SM-5Q5A5	Breast - Mammary Tissue	Breast	male	GTEX-12KS4	GTEX
GTEX-12KS4-0326-SM-5EQ41	Skin - Sun Exposed (Lower leg)	Skin	male	GTEX-12KS4	GTEX
GTEX-12KS4-0426-SM-5EQMC	Adipose - Subcutaneous	Adipose Tissue	male	GTEX-12KS4	GTEX
GTEX-12KS4-0626-SM-5PNY4	Artery - Aorta	Blood Vessel	male	GTEX-12KS4	GTEX
GTEX-12KS4-0726-SM-5FQSX	Lung	Lung	male	GTEX-12KS4	GTEX
GTEX-12KS4-0826-SM-5BC5R	Muscle - Skeletal	Muscle	male	GTEX-12KS4	GTEX
GTEX-12KS4-0926-SM-5BC5S	Esophagus - Mucosa	Esophagus	male	GTEX-12KS4	GTEX
GTEX-12KS4-1026-SM-5FQTD	Esophagus - Muscularis	Esophagus	male	GTEX-12KS4	GTEX
GTEX-12KS4-1126-SM-5FQUI	Nerve - Tibial	Nerve	male	GTEX-12KS4	GTEX
GTEX-12KS4-1326-SM-5LUB3	Liver	Liver	male	GTEX-12KS4	GTEX
GTEX-12KS4-1526-SM-5EQ6E	Adipose - Visceral (Omentum)	Adipose Tissue	male	GTEX-12KS4	GTEX
GTEX-12KS4-2126-SM-5FQUT	Skin - Not Sun Exposed (Suprapubic)	Skin	male	GTEX-12KS4	GTEX
GTEX-12KS4-2326-SM-5EGJB	Colon - Sigmoid	Colon	male	GTEX-12KS4	GTEX
GTEX-12KS4-2426-SM-5LU8P	Colon - Transverse	Colon	male	GTEX-12KS4	GTEX
GTEX-12WS9-0006-SM-5O99W	Whole Blood	Blood	female	GTEX-12WS9	GTEX
GTEX-12WS9-0011-R10a-SM-57WBV	Brain - Frontal Cortex (BA9)	Brain	female	GTEX-12WS9	GTEX
GTEX-12WS9-0011-R2a-SM-5CVNE	Brain - Substantia nigra	Brain	female	GTEX-12WS9	GTEX
GTEX-12WS9-0011-R3a-SM-5CVNF	Brain - Anterior cingulate cortex (BA24)	Brain	female	GTEX-12WS9	GTEX
GTEX-12WS9-0011-R4b-SM-5P9EU	Brain - Amygdala	Brain	female	GTEX-12WS9	GTEX
GTEX-12WS9-0011-R5b-SM-5P9EV	Brain - Caudate (basal ganglia)	Brain	female	GTEX-12WS9	GTEX
GTEX-12WS9-0011-R6a-SM-5P9EW	Brain - Nucleus accumbens (basal ganglia)	Brain	female	GTEX-12WS9	GTEX
GTEX-12WS9-0126-SM-5EGL7	Skin - Sun Exposed (Lower leg)	Skin	female	GTEX-12WS9	GTEX
GTEX-12WS9-0226-SM-5EQ4X	Adipose - Subcutaneous	Adipose Tissue	female	GTEX-12WS9	GTEX
GTEX-12WS9-0326-SM-59HJV	Skin - Not Sun Exposed (Suprapubic)	Skin	female	GTEX-12WS9	GTEX
GTEX-12WS9-0426-SM-59HJW	Nerve - Tibial	Nerve	female	GTEX-12WS9	GTEX
GTEX-12WS9-0526-SM-5FQT5	Artery - Tibial	Blood Vessel	female	GTEX-12WS9	GTEX
GTEX-12WS9-0626-SM-5FQT2	Muscle - Skeletal	Muscle	female	GTEX-12WS9	GTEX
GTEX-12WS9-0726-SM-5FQT7	Thyroid	Thyroid	female	GTEX-12WS9	GTEX
GTEX-12WS9-0826-SM-59HJX	Heart - Atrial Appendage	Heart	female	GTEX-12WS9	GTEX
GTEX-12WS9-1426-SM-5FQT3	Stomach	Stomach	female	GTEX-12WS9	GTEX
GTEX-12WS9-1526-SM-5FQT4	Esophagus - Mucosa	Esophagus	female	GTEX-12WS9	GTEX
GTEX-12WS9-2826-SM-5FQU9	Brain - Cerebellum	Brain	female	GTEX-12WS9	GTEX
GTEX-12WS9-2926-SM-5EGL8	Brain - Cortex	Brain	female	GTEX-12WS9	GTEX
GTEX-12WS9-3026-SM-5EGIE	Pituitary	Pituitary	female	GTEX-12WS9	GTEX
GTEX-12WSA-0005-SM-5O9BM	Whole Blood	Blood	male	GTEX-12WSA	GTEX
GTEX-12WSA-0011-R10b-SM-5P9ET	Brain - Frontal Cortex (BA9)	Brain	male	GTEX-12WSA	GTEX
GTEX-12WSA-0011-R2a-SM-57WDK	Brain - Substantia nigra	Brain	male	GTEX-12WSA	GTEX
GTEX-12WSA-0011-R4a-SM-57WB7	Brain - Amygdala	Brain	male	GTEX-12WSA	GTEX
GTEX-12WSA-0011-R5b-SM-5GU5I	Brain - Caudate (basal ganglia)	Brain	male	GTEX-12WSA	GTEX
GTEX-12WSA-0011-R7b-SM-5GU5U	Brain - Putamen (basal ganglia)	Brain	male	GTEX-12WSA	GTEX
GTEX-12WSA-0011-R8a-SM-5P9EX	Brain - Hypothalamus	Brain	male	GTEX-12WSA	GTEX
GTEX-12WSA-0226-SM-5BC5V	Skin - Sun Exposed (Lower leg)	Skin	male	GTEX-12WSA	GTEX
GTEX-12WSA-0326-SM-5BC6I	Adipose - Subcutaneous	Adipose Tissue	male	GTEX-12WSA	GTEX
GTEX-12WSA-0426-SM-5EQ5X	Skin - Not Sun Exposed (Suprapubic)	Skin	male	GTEX-12WSA	GTEX
GTEX-12WSA-0726-SM-5FQU2	Muscle - Skeletal	Muscle	male	GTEX-12WSA	GTEX
GTEX-12WSA-1026-SM-5EGHN	Lung	Lung	male	GTEX-12WSA	GTEX
GTEX-12WSA-1126-SM-5EGKU	Heart - Atrial Appendage	Heart	male	GTEX-12WSA	GTEX
GTEX-12WSA-1426-SM-5EGJU	Esophagus - Mucosa	Esophagus	male	GTEX-12WSA	GTEX
GTEX-12WSA-1626-SM-5EGJV	Adipose - Visceral (Omentum)	Adipose Tissue	male	GTEX-12WSA	GTEX
GTEX-12WSA-2926-SM-5EQ4D	Brain - Cortex	Brain	male	GTEX-12WSA	GTEX
GTEX-12WSB-0006-SM-5O998	Whole Blood	Blood	female	GTEX-12WSB	GTEX
GTEX-12WSB-0011-R11b-SM-57WBJ	Brain - Cerebellar Hemisphere	Brain	female	GTEX-12WSB	GTEX
GTEX-12WSB-0011-R1b-SM-5P9EY	Brain - Hippocampus	Brain	female	GTEX-12WSB	GTEX
GTEX-12WSB-0011-R5b-SM-5GU67	Brain - Caudate (basal ganglia)	Brain	female	GTEX-12WSB	GTEX
GTEX-12WSB-0011-R6b-SM-5GU6J	Brain - Nucleus accumbens (basal ganglia)	Brain	female	GTEX-12WSB	GTEX
GTEX-12WSB-0011-R7b-SM-5GU6V	Brain - Putamen (basal ganglia)	Brain	female	GTEX-12WSB	GTEX
GTEX-12WSB-0126-SM-59HJN	Skin - Sun Exposed (Lower leg)	Skin	female	GTEX-12WSB	GTEX
GTEX-12WSB-0226-SM-5GCOR	Adipose - Subcutaneous	Adipose Tissue	female	GTEX-12WSB	GTEX
GTEX-12WSB-0326-SM-5GCP4	Muscle - Skeletal	Muscle	female	GTEX-12WSB	GTEX
GTEX-12WSB-0426-SM-5BC6H	Nerve - Tibial	Nerve	female	GTEX-12WSB	GTEX
GTEX-12WSB-0626-SM-59HJO	Breast - Mammary Tissue	Breast	female	GTEX-12WSB	GTEX
GTEX-12WSB-0726-SM-5N9GD	Thyroid	Thyroid	female	GTEX-12WSB	GTEX
GTEX-12WSB-2226-SM-5GCOS	Ovary	Ovary	female	GTEX-12WSB	GTEX
GTEX-12WSB-2426-SM-5EGJC	Vagina	Vagina	female	GTEX-12WSB	GTEX
GTEX-12WSB-2926-SM-59HKL	Skin - Not Sun Exposed (Suprapubic)	Skin	female	GTEX-12WSB	GTEX
GTEX-12WSB-3026-SM-59HKM	Brain - Cerebellum	Brain	female	GTEX-12WSB	GTEX
GTEX-12WSB-3226-SM-59HJP	Pituitary	Pituitary	female	GTEX-12WSB	GTEX
GTEX-12WSC-0005-SM-5MR3H	Whole Blood	Blood	male	GTEX-12WSC	GTEX
GTEX-12WSC-0011-R10a-SM-5GU57	Brain - Frontal Cortex (BA9)	Brain	male	GTEX-12WSC	GTEX
GTEX-12WSC-0011-R11a-SM-5GU5J	Brain - Cerebellar Hemisphere	Brain	male	GTEX-12WSC	GTEX
GTEX-12WSC-0011-R3a-SM-5P9F1	Brain - Anterior cingulate cortex (BA24)	Brain	male	GTEX-12WSC	GTEX
GTEX-12WSC-0011-R5b-SM-5CVNS	Brain - Caudate (basal ganglia)	Brain	male	GTEX-12WSC	GTEX
GTEX-12WSC-0011-R6b-SM-5LU99	Brain - Nucleus accumbens (basal ganglia)	Brain	male	GTEX-12WSC	GTEX
GTEX-12WSC-0011-R7b-SM-5LU9L	Brain - Putamen (basal ganglia)	Brain	male	GTEX-12WSC	GTEX
GTEX-12WSC-0011-R9a-SM-5GU4U	Brain - Spinal cord (cervical c-1)	Brain	male	GTEX-12WSC	GTEX
GTEX-12WSC-0126-SM-5EQ4P	Skin - Sun Exposed (Lower leg)	Skin	male	GTEX-12WSC	GTEX
GTEX-12WSC-0226-SM-5EQ52	Adipose - Subcutaneous	Adipose Tissue	male	GTEX-12WSC	GTEX
GTEX-12WSC-0326-SM-5EQ5E	Muscle - Skeletal	Muscle	male	GTEX-12WSC	GTEX
GTEX-12WSC-0526-SM-5BC5X	Artery - Tibial	Blood Vessel	male	GTEX-12WSC	GTEX
GTEX-12WSC-0826-SM-5EQ5Q	Thyroid	Thyroid	male	GTEX-12WSC	GTEX
GTEX-12WSC-0926-SM-5EQ63	Artery - Coronary	Blood Vessel	male	GTEX-12WSC	GTEX
GTEX-12WSC-1026-SM-5EQ5Y	Heart - Atrial Appendage	Heart	male	GTEX-12WSC	GTEX
GTEX-12WSC-1126-SM-5EQ4G	Heart - Left Ventricle	Heart	male	GTEX-12WSC	GTEX
GTEX-12WSC-1726-SM-5GCN3	Adipose - Visceral (Omentum)	Adipose Tissue	male	GTEX-12WSC	GTEX
GTEX-12WSC-2826-SM-5BC5Y	Skin - Not Sun Exposed (Suprapubic)	Skin	male	GTEX-12WSC	GTEX
GTEX-12WSC-2926-SM-5BC5Z	Brain - Cerebellum	Brain	male	GTEX-12WSC	GTEX
GTEX-12WSC-3026-SM-5GCNF	Brain - Cortex	Brain	male	GTEX-12WSC	GTEX
GTEX-12WSC-3126-SM-5GCNB	Pituitary	Pituitary	male	GTEX-12WSC	GTEX
GTEX-12WSD-0005-SM-5N9FZ	Whole Blood	Blood	female	GTEX-12WSD	GTEX
GTEX-12WSD-0011-R10b-SM-5GU79	Brain - Frontal Cortex (BA9)	Brain	female	GTEX-12WSD	GTEX
GTEX-12WSD-0011-R1b-SM-5LZVY	Brain - Hippocampus	Brain	female	GTEX-12WSD	GTEX
GTEX-12WSD-0011-R2a-SM-5LZWB	Brain - Substantia nigra	Brain	female	GTEX-12WSD	GTEX
GTEX-12WSD-0011-R3b-SM-5LZWN	Brain - Anterior cingulate cortex (BA24)	Brain	female	GTEX-12WSD	GTEX
GTEX-12WSD-0011-R4b-SM-5LZUA	Brain - Amygdala	Brain	female	GTEX-12WSD	GTEX
GTEX-12WSD-0011-R5b-SM-5CVNG	Brain - Caudate (basal ganglia)	Brain	female	GTEX-12WSD	GTEX
GTEX-12WSD-0011-R6b-SM-5P9JU	Brain - Nucleus accumbens (basal ganglia)	Brain	female	GTEX-12WSD	GTEX
GTEX-12WSD-0011-R7b-SM-5PNWE	Brain - Putamen (basal ganglia)	Brain	female	GTEX-12WSD	GTEX
GTEX-12WSD-0011-R9a-SM-5GU6W	Brain - Spinal cord (cervical c-1)	Brain	female	GTEX-12WSD	GTEX
GTEX-12WSD-0126-SM-59HKN	Skin - Sun Exposed (Lower leg)	Skin	female	GTEX-12WSD	GTEX
GTEX-12WSD-0226-SM-59HKO	Adipose - Subcutaneous	Adipose Tissue	female	GTEX-12WSD	GTEX
GTEX-12WSD-0326-SM-59HKP	Nerve - Tibial	Nerve	female	GTEX-12WSD	GTEX
GTEX-12WSD-0526-SM-5EQ6F	Muscle - Skeletal	Muscle	female	GTEX-12WSD	GTEX
GTEX-12WSD-0626-SM-5GCMW	Skin - Not Sun Exposed (Suprapubic)	Skin	female	GTEX-12WSD	GTEX
GTEX-12WSD-0826-SM-5GCNE	Lung	Lung	female	GTEX-12WSD	GTEX
GTEX-12WSD-0926-SM-5GCNL	Thyroid	Thyroid	female	GTEX-12WSD	GTEX
GTEX-12WSD-1026-SM-5EQ42	Artery - Coronary	Blood Vessel	female	GTEX-12WSD	GTEX
GTEX-12WSD-1126-SM-5EGJD	Heart - Left Ventricle	Heart	female	GTEX-12WSD	GTEX
GTEX-12WSD-1226-SM-5HL9Q	Heart - Atrial Appendage	Heart	female	GTEX-12WSD	GTEX
GTEX-12WSD-1326-SM-5GCNU	Artery - Aorta	Blood Vessel	female	GTEX-12WSD	GTEX
GTEX-12WSD-1426-SM-5GCN9	Liver	Liver	female	GTEX-12WSD	GTEX
GTEX-12WSD-1626-SM-5GCNR	Pancreas	Pancreas	female	GTEX-12WSD	GTEX
GTEX-12WSD-1726-SM-5GCN4	Spleen	Spleen	female	GTEX-12WSD	GTEX
GTEX-12WSD-1826-SM-5GCOA	Esophagus - Mucosa	Esophagus	female	GTEX-12WSD	GTEX
GTEX-12WSD-1926-SM-5GCOV	Esophagus - Muscularis	Esophagus	female	GTEX-12WSD	GTEX
GTEX-12WSD-2026-SM-5HL7D	Esophagus - Gastroesophageal Junction	Esophagus	female	GTEX-12WSD	GTEX
GTEX-12WSD-2126-SM-5LZWK	Adrenal Gland	Adrenal Gland	female	GTEX-12WSD	GTEX
GTEX-12WSD-2326-SM-59HKQ	Stomach	Stomach	female	GTEX-12WSD	GTEX
GTEX-12WSD-2626-SM-5EGJE	Colon - Sigmoid	Colon	female	GTEX-12WSD	GTEX
GTEX-12WSD-2726-SM-59HLR	Ovary	Ovary	female	GTEX-12WSD	GTEX
GTEX-12WSD-2826-SM-59HKT	Uterus	Uterus	female	GTEX-12WSD	GTEX
GTEX-12WSD-2926-SM-5LZUH	Vagina	Vagina	female	GTEX-12WSD	GTEX
GTEX-12WSD-3026-SM-5LZU7	Brain - Cerebellum	Brain	female	GTEX-12WSD	GTEX
GTEX-12WSD-3126-SM-5HL7P	Brain - Cortex	Brain	female	GTEX-12WSD	GTEX
GTEX-12WSD-3226-SM-5HL9G	Pituitary	Pituitary	female	GTEX-12WSD	GTEX
GTEX-12WSE-0005-SM-5NQAE	Whole Blood	Blood	male	GTEX-12WSE	GTEX
GTEX-12WSE-0011-R10b-SM-5P9JV	Brain - Frontal Cortex (BA9)	Brain	male	GTEX-12WSE	GTEX
GTEX-12WSE-0011-R11b-SM-5P9JW	Brain - Cerebellar Hemisphere	Brain	male	GTEX-12WSE	GTEX
GTEX-12WSE-0011-R1b-SM-5GU4V	Brain - Hippocampus	Brain	male	GTEX-12WSE	GTEX
GTEX-12WSE-0011-R6b-SM-5LZV5	Brain - Nucleus accumbens (basal ganglia)	Brain	male	GTEX-12WSE	GTEX
GTEX-12WSE-0011-R7a-SM-5PNWF	Brain - Putamen (basal ganglia)	Brain	male	GTEX-12WSE	GTEX
GTEX-12WSE-0826-SM-5S2VL	Lung	Lung	male	GTEX-12WSE	GTEX
GTEX-12WSE-0926-SM-5S2VX	Heart - Atrial Appendage	Heart	male	GTEX-12WSE	GTEX
GTEX-12WSE-2926-SM-5RQJ9	Brain - Cerebellum	Brain	male	GTEX-12WSE	GTEX
GTEX-12WSF-0005-SM-5NQAQ	Whole Blood	Blood	male	GTEX-12WSF	GTEX
GTEX-12WSF-0011-R10a-SM-5LZVH	Brain - Frontal Cortex (BA9)	Brain	male	GTEX-12WSF	GTEX
GTEX-12WSF-0011-R11a-SM-5LZVT	Brain - Cerebellar Hemisphere	Brain	male	GTEX-12WSF	GTEX
GTEX-12WSF-0011-R1a-SM-5DUVI	Brain - Hippocampus	Brain	male	GTEX-12WSF	GTEX
GTEX-12WSF-0011-R2a-SM-5DUVU	Brain - Substantia nigra	Brain	male	GTEX-12WSF	GTEX
GTEX-12WSF-0011-R3a-SM-5DUW7	Brain - Anterior cingulate cortex (BA24)	Brain	male	GTEX-12WSF	GTEX
GTEX-12WSF-0011-R4b-SM-5HL88	Brain - Amygdala	Brain	male	GTEX-12WSF	GTEX
GTEX-12WSF-0011-R5a-SM-5HL8K	Brain - Caudate (basal ganglia)	Brain	male	GTEX-12WSF	GTEX
GTEX-12WSF-0011-R6b-SM-5HL8W	Brain - Nucleus accumbens (basal ganglia)	Brain	male	GTEX-12WSF	GTEX
GTEX-12WSF-0011-R7b-SM-5HL99	Brain - Putamen (basal ganglia)	Brain	male	GTEX-12WSF	GTEX
GTEX-12WSG-0005-SM-5NQA2	Whole Blood	Blood	female	GTEX-12WSG	GTEX
GTEX-12WSG-0226-SM-5EGIF	Thyroid	Thyroid	female	GTEX-12WSG	GTEX
GTEX-12WSG-0326-SM-5FQU3	Lung	Lung	female	GTEX-12WSG	GTEX
GTEX-12WSG-0426-SM-5FQSE	Adipose - Visceral (Omentum)	Adipose Tissue	female	GTEX-12WSG	GTEX
GTEX-12WSG-0526-SM-5FQTH	Heart - Left Ventricle	Heart	female	GTEX-12WSG	GTEX
GTEX-12WSG-0626-SM-5FQTQ	Liver	Liver	female	GTEX-12WSG	GTEX
GTEX-12WSG-0726-SM-5EGIG	Adrenal Gland	Adrenal Gland	female	GTEX-12WSG	GTEX
GTEX-12WSG-0826-SM-5EQ5A	Kidney - Cortex	Kidney	female	GTEX-12WSG	GTEX
GTEX-12WSG-0926-SM-5EGIH	Spleen	Spleen	female	GTEX-12WSG	GTEX
GTEX-12WSG-1026-SM-5EGII	Pancreas	Pancreas	female	GTEX-12WSG	GTEX
GTEX-12WSG-1226-SM-5EQ4C	Heart - Atrial Appendage	Heart	female	GTEX-12WSG	GTEX
GTEX-12WSG-1426-SM-5FQUK	Ovary	Ovary	female	GTEX-12WSG	GTEX
GTEX-12WSG-2026-SM-5FQUU	Stomach	Stomach	female	GTEX-12WSG	GTEX
GTEX-12WSG-2126-SM-5EGJ7	Uterus	Uterus	female	GTEX-12WSG	GTEX
GTEX-12WSG-2426-SM-5EQLZ	Colon - Sigmoid	Colon	female	GTEX-12WSG	GTEX
GTEX-12WSG-2526-SM-5EQ4O	Muscle - Skeletal	Muscle	female	GTEX-12WSG	GTEX
GTEX-12WSG-2726-SM-5EQ5M	Nerve - Tibial	Nerve	female	GTEX-12WSG	GTEX
GTEX-12WSG-2826-SM-5FQUS	Skin - Sun Exposed (Lower leg)	Skin	female	GTEX-12WSG	GTEX
GTEX-12WSH-0005-SM-5NQ9P	Whole Blood	Blood	male	GTEX-12WSH	GTEX
GTEX-12WSH-0008-SM-5S2V1	Cells - Transformed fibroblasts	Skin	male	GTEX-12WSH	GTEX
GTEX-12WSH-0011-R10a-SM-5LZUS	Brain - Frontal Cortex (BA9)	Brain	male	GTEX-12WSH	GTEX
GTEX-12WSH-0011-R11a-SM-5LZVM	Brain - Cerebellar Hemisphere	Brain	male	GTEX-12WSH	GTEX
GTEX-12WSH-0011-R1a-SM-5GU5V	Brain - Hippocampus	Brain	male	GTEX-12WSH	GTEX
GTEX-12WSH-0011-R2a-SM-5GU68	Brain - Substantia nigra	Brain	male	GTEX-12WSH	GTEX
GTEX-12WSH-0011-R4a-SM-5GU6K	Brain - Amygdala	Brain	male	GTEX-12WSH	GTEX
GTEX-12WSH-0011-R5b-SM-5P9F3	Brain - Caudate (basal ganglia)	Brain	male	GTEX-12WSH	GTEX
GTEX-12WSH-0011-R6b-SM-5P9F4	Brain - Nucleus accumbens (basal ganglia)	Brain	male	GTEX-12WSH	GTEX
GTEX-12WSH-0011-R9b-SM-5LZUG	Brain - Spinal cord (cervical c-1)	Brain	male	GTEX-12WSH	GTEX
GTEX-12WSH-0126-SM-5GCO3	Lung	Lung	male	GTEX-12WSH	GTEX
GTEX-12WSH-0226-SM-5GCOG	Thyroid	Thyroid	male	GTEX-12WSH	GTEX
GTEX-12WSH-0326-SM-5GCNH	Testis	Testis	male	GTEX-12WSH	GTEX
GTEX-12WSH-1526-SM-5BC5W	Skin - Not Sun Exposed (Suprapubic)	Skin	male	GTEX-12WSH	GTEX
GTEX-12WSH-2526-SM-5CVNH	Muscle - Skeletal	Muscle	male	GTEX-12WSH	GTEX
GTEX-12WSH-2826-SM-5GCP5	Artery - Tibial	Blood Vessel	male	GTEX-12WSH	GTEX
GTEX-12WSH-2926-SM-5GCMR	Pituitary	Pituitary	male	GTEX-12WSH	GTEX
GTEX-12WSH-3026-SM-5CVNI	Brain - Cortex	Brain	male	GTEX-12WSH	GTEX
GTEX-12WSH-3126-SM-5LZW8	Brain - Cerebellum	Brain	male	GTEX-12WSH	GTEX
GTEX-12WSI-0005-SM-5O99K	Whole Blood	Blood	male	GTEX-12WSI	GTEX
GTEX-12WSI-0011-R11b-SM-5P9EZ	Brain - Cerebellar Hemisphere	Brain	male	GTEX-12WSI	GTEX
GTEX-12WSI-0011-R7b-SM-5GU78	Brain - Putamen (basal ganglia)	Brain	male	GTEX-12WSI	GTEX
GTEX-12WSI-0226-SM-5GCNA	Liver	Liver	male	GTEX-12WSI	GTEX
GTEX-12WSI-0426-SM-5EQ5J	Heart - Atrial Appendage	Heart	male	GTEX-12WSI	GTEX
GTEX-12WSI-0826-SM-5EGKD	Lung	Lung	male	GTEX-12WSI	GTEX
GTEX-12WSI-1526-SM-5GCNM	Adipose - Visceral (Omentum)	Adipose Tissue	male	GTEX-12WSI	GTEX
GTEX-12WSI-2126-SM-5GCMV	Testis	Testis	male	GTEX-12WSI	GTEX
GTEX-12WSJ-0005-SM-5LU8S	Whole Blood	Blood	female	GTEX-12WSJ	GTEX
GTEX-12WSJ-0126-SM-5GCOM	Adrenal Gland	Adrenal Gland	female	GTEX-12WSJ	GTEX
GTEX-12WSJ-0226-SM-5GCP7	Lung	Lung	female	GTEX-12WSJ	GTEX
GTEX-12WSJ-0326-SM-5GCMT	Thyroid	Thyroid	female	GTEX-12WSJ	GTEX
GTEX-12WSJ-0526-SM-5GCOZ	Spleen	Spleen	female	GTEX-12WSJ	GTEX
GTEX-12WSJ-0726-SM-5GCN6	Esophagus - Muscularis	Esophagus	female	GTEX-12WSJ	GTEX
GTEX-12WSJ-0826-SM-5PNWV	Esophagus - Gastroesophageal Junction	Esophagus	female	GTEX-12WSJ	GTEX
GTEX-12WSJ-0926-SM-5P9JD	Stomach	Stomach	female	GTEX-12WSJ	GTEX
GTEX-12WSJ-1126-SM-5LZVJ	Skin - Not Sun Exposed (Suprapubic)	Skin	female	GTEX-12WSJ	GTEX
GTEX-12WSJ-1226-SM-5LU91	Ovary	Ovary	female	GTEX-12WSJ	GTEX
GTEX-12WSJ-1326-SM-5GCOB	Vagina	Vagina	female	GTEX-12WSJ	GTEX
GTEX-12WSJ-1426-SM-5GCON	Colon - Sigmoid	Colon	female	GTEX-12WSJ	GTEX
GTEX-12WSJ-1526-SM-5GCNI	Colon - Transverse	Colon	female	GTEX-12WSJ	GTEX
GTEX-12WSJ-1726-SM-5LZVV	Muscle - Skeletal	Muscle	female	GTEX-12WSJ	GTEX
GTEX-12WSJ-1826-SM-5GCNY	Skin - Sun Exposed (Lower leg)	Skin	female	GTEX-12WSJ	GTEX
GTEX-12WSK-0006-SM-5NQA1	Whole Blood	Blood	female	GTEX-12WSK	GTEX
GTEX-12WSK-0126-SM-5GCO7	Spleen	Spleen	female	GTEX-12WSK	GTEX
GTEX-12WSK-0226-SM-5BC62	Pancreas	Pancreas	female	GTEX-12WSK	GTEX
GTEX-12WSK-0326-SM-5GCOJ	Adrenal Gland	Adrenal Gland	female	GTEX-12WSK	GTEX
GTEX-12WSK-0426-SM-5GCNS	Artery - Aorta	Blood Vessel	female	GTEX-12WSK	GTEX
GTEX-12WSK-0526-SM-5CVNA	Heart - Atrial Appendage	Heart	female	GTEX-12WSK	GTEX
GTEX-12WSK-0626-SM-5LZUJ	Heart - Left Ventricle	Heart	female	GTEX-12WSK	GTEX
GTEX-12WSK-0726-SM-5LZUV	Artery - Coronary	Blood Vessel	female	GTEX-12WSK	GTEX
GTEX-12WSK-0826-SM-5CVNP	Lung	Lung	female	GTEX-12WSK	GTEX
GTEX-12WSK-0926-SM-5CVNQ	Thyroid	Thyroid	female	GTEX-12WSK	GTEX
GTEX-12WSK-1026-SM-5CVNR	Adipose - Visceral (Omentum)	Adipose Tissue	female	GTEX-12WSK	GTEX
GTEX-12WSK-1126-SM-5LZV8	Esophagus - Mucosa	Esophagus	female	GTEX-12WSK	GTEX
GTEX-12WSK-1326-SM-5CVNM	Esophagus - Gastroesophageal Junction	Esophagus	female	GTEX-12WSK	GTEX
GTEX-12WSK-1426-SM-5CVNN	Stomach	Stomach	female	GTEX-12WSK	GTEX
GTEX-12WSK-1526-SM-5CVNO	Small Intestine - Terminal Ileum	Small Intestine	female	GTEX-12WSK	GTEX
GTEX-12WSK-1926-SM-5LZVK	Ovary	Ovary	female	GTEX-12WSK	GTEX
GTEX-12WSK-2026-SM-5CVNB	Uterus	Uterus	female	GTEX-12WSK	GTEX
GTEX-12WSK-2126-SM-5CVNC	Skin - Not Sun Exposed (Suprapubic)	Skin	female	GTEX-12WSK	GTEX
GTEX-12WSK-2226-SM-5GCO5	Breast - Mammary Tissue	Breast	female	GTEX-12WSK	GTEX
GTEX-12WSK-2326-SM-5GCOH	Skin - Sun Exposed (Lower leg)	Skin	female	GTEX-12WSK	GTEX
GTEX-12WSK-2626-SM-5GCOT	Nerve - Tibial	Nerve	female	GTEX-12WSK	GTEX
GTEX-12WSK-2726-SM-5CVND	Artery - Tibial	Blood Vessel	female	GTEX-12WSK	GTEX
GTEX-12WSL-0005-SM-5NQAD	Whole Blood	Blood	male	GTEX-12WSL	GTEX
GTEX-12WSL-0226-SM-5CVMJ	Liver	Liver	male	GTEX-12WSL	GTEX
GTEX-12WSL-0326-SM-5CVMK	Adrenal Gland	Adrenal Gland	male	GTEX-12WSL	GTEX
GTEX-12WSL-0426-SM-5GCNX	Pancreas	Pancreas	male	GTEX-12WSL	GTEX
GTEX-12WSL-0626-SM-5GCOY	Thyroid	Thyroid	male	GTEX-12WSL	GTEX
GTEX-12WSL-0926-SM-5N9EK	Artery - Coronary	Blood Vessel	male	GTEX-12WSL	GTEX
GTEX-12WSL-1026-SM-5CVNJ	Lung	Lung	male	GTEX-12WSL	GTEX
GTEX-12WSL-1126-SM-5CVNK	Adipose - Visceral (Omentum)	Adipose Tissue	male	GTEX-12WSL	GTEX
GTEX-12WSL-1226-SM-5DUXE	Esophagus - Gastroesophageal Junction	Esophagus	male	GTEX-12WSL	GTEX
GTEX-12WSL-1326-SM-5LZVW	Esophagus - Muscularis	Esophagus	male	GTEX-12WSL	GTEX
GTEX-12WSL-1526-SM-5GCP8	Esophagus - Mucosa	Esophagus	male	GTEX-12WSL	GTEX
GTEX-12WSL-1626-SM-5GCMU	Colon - Transverse	Colon	male	GTEX-12WSL	GTEX
GTEX-12WSL-1826-SM-5LZW9	Colon - Sigmoid	Colon	male	GTEX-12WSL	GTEX
GTEX-12WSL-2026-SM-5GCML	Skin - Not Sun Exposed (Suprapubic)	Skin	male	GTEX-12WSL	GTEX
GTEX-12WSL-2126-SM-5GCNG	Minor Salivary Gland	Salivary Gland	male	GTEX-12WSL	GTEX
GTEX-12WSL-2326-SM-5DUXQ	Testis	Testis	male	GTEX-12WSL	GTEX
GTEX-12WSL-2426-SM-5GCN7	Adipose - Subcutaneous	Adipose Tissue	male	GTEX-12WSL	GTEX
GTEX-12WSL-2526-SM-5GCNJ	Skin - Sun Exposed (Lower leg)	Skin	male	GTEX-12WSL	GTEX
GTEX-12WSL-2626-SM-5GCNV	Artery - Tibial	Blood Vessel	male	GTEX-12WSL	GTEX
GTEX-12WSL-2726-SM-5CVNL	Muscle - Skeletal	Muscle	male	GTEX-12WSL	GTEX
GTEX-12WSL-2826-SM-5LZWL	Nerve - Tibial	Nerve	male	GTEX-12WSL	GTEX
GTEX-12WSM-0005-SM-5NQB3	Whole Blood	Blood	male	GTEX-12WSM	GTEX
GTEX-12WSM-0008-SM-5S2VD	Cells - Transformed fibroblasts	Skin	male	GTEX-12WSM	GTEX
GTEX-12WSM-0011-R10a-SM-5DUWV	Brain - Frontal Cortex (BA9)	Brain	male	GTEX-12WSM	GTEX
GTEX-12WSM-0011-R11a-SM-5DUX8	Brain - Cerebellar Hemisphere	Brain	male	GTEX-12WSM	GTEX
GTEX-12WSM-0011-R1a-SM-5LZW6	Brain - Hippocampus	Brain	male	GTEX-12WSM	GTEX
GTEX-12WSM-0011-R3b-SM-5LZWI	Brain - Anterior cingulate cortex (BA24)	Brain	male	GTEX-12WSM	GTEX
GTEX-12WSM-0011-R5a-SM-5EQ4Y	Brain - Caudate (basal ganglia)	Brain	male	GTEX-12WSM	GTEX
GTEX-12WSM-0011-R6b-SM-5EQ6N	Brain - Nucleus accumbens (basal ganglia)	Brain	male	GTEX-12WSM	GTEX
GTEX-12WSM-0011-R7b-SM-5EGLD	Brain - Putamen (basal ganglia)	Brain	male	GTEX-12WSM	GTEX
GTEX-12WSM-0011-R8a-SM-5DUWJ	Brain - Hypothalamus	Brain	male	GTEX-12WSM	GTEX
GTEX-12WSM-0226-SM-5LZV6	Adipose - Subcutaneous	Adipose Tissue	male	GTEX-12WSM	GTEX
GTEX-12WSM-0326-SM-5LZVI	Muscle - Skeletal	Muscle	male	GTEX-12WSM	GTEX
GTEX-12WSM-0426-SM-5LZVU	Nerve - Tibial	Nerve	male	GTEX-12WSM	GTEX
GTEX-12WSM-0526-SM-5GCO8	Artery - Tibial	Blood Vessel	male	GTEX-12WSM	GTEX
GTEX-12WSM-0626-SM-5GCOK	Adipose - Visceral (Omentum)	Adipose Tissue	male	GTEX-12WSM	GTEX
GTEX-12WSM-0726-SM-5GCOW	Liver	Liver	male	GTEX-12WSM	GTEX
GTEX-12WSM-1326-SM-5GCP9	Testis	Testis	male	GTEX-12WSM	GTEX
GTEX-12WSM-1426-SM-5GCPA	Colon - Sigmoid	Colon	male	GTEX-12WSM	GTEX
GTEX-12WSM-1726-SM-5BC6J	Breast - Mammary Tissue	Breast	male	GTEX-12WSM	GTEX
GTEX-12WSM-1826-SM-5BC64	Minor Salivary Gland	Salivary Gland	male	GTEX-12WSM	GTEX
GTEX-12WSM-1926-SM-5BC65	Skin - Not Sun Exposed (Suprapubic)	Skin	male	GTEX-12WSM	GTEX
GTEX-12WSM-2126-SM-5GCOC	Brain - Cerebellum	Brain	male	GTEX-12WSM	GTEX
GTEX-12WSM-2226-SM-5DUVS	Pituitary	Pituitary	male	GTEX-12WSM	GTEX
GTEX-12WSN-0006-SM-5NQAP	Whole Blood	Blood	male	GTEX-12WSN	GTEX
GTEX-12WSN-0126-SM-5DUX5	Spleen	Spleen	male	GTEX-12WSN	GTEX
GTEX-12WSN-0226-SM-5DUXH	Heart - Atrial Appendage	Heart	male	GTEX-12WSN	GTEX
GTEX-12WSN-0326-SM-5GCP6	Artery - Aorta	Blood Vessel	male	GTEX-12WSN	GTEX
GTEX-12WSN-0626-SM-5BC61	Lung	Lung	male	GTEX-12WSN	GTEX
GTEX-12WSN-0726-SM-5GCMS	Thyroid	Thyroid	male	GTEX-12WSN	GTEX
GTEX-12WSN-0826-SM-5GCOF	Pancreas	Pancreas	male	GTEX-12WSN	GTEX
GTEX-12WSN-0926-SM-5GCN1	Adrenal Gland	Adrenal Gland	male	GTEX-12WSN	GTEX
GTEX-12WSN-1326-SM-5GCNT	Breast - Mammary Tissue	Breast	male	GTEX-12WSN	GTEX
GTEX-12WSN-1426-SM-5GCO6	Skin - Not Sun Exposed (Suprapubic)	Skin	male	GTEX-12WSN	GTEX
GTEX-12WSN-1826-SM-5LZUT	Esophagus - Gastroesophageal Junction	Esophagus	male	GTEX-12WSN	GTEX
GTEX-12WSN-2226-SM-5DUXT	Minor Salivary Gland	Salivary Gland	male	GTEX-12WSN	GTEX
GTEX-12WSN-2326-SM-5DUVG	Skin - Sun Exposed (Lower leg)	Skin	male	GTEX-12WSN	GTEX
GTEX-12WSN-2526-SM-5LZU8	Muscle - Skeletal	Muscle	male	GTEX-12WSN	GTEX
GTEX-12WSN-2726-SM-5LZUK	Artery - Tibial	Blood Vessel	male	GTEX-12WSN	GTEX
GTEX-12ZZW-0005-SM-5O9BY	Whole Blood	Blood	male	GTEX-12ZZW	GTEX
GTEX-12ZZW-0011-R10b-SM-5HL9X	Brain - Frontal Cortex (BA9)	Brain	male	GTEX-12ZZW	GTEX
GTEX-12ZZW-0011-R3a-SM-5DUWW	Brain - Anterior cingulate cortex (BA24)	Brain	male	GTEX-12ZZW	GTEX
GTEX-12ZZW-0011-R4a-SM-5DUX9	Brain - Amygdala	Brain	male	GTEX-12ZZW	GTEX
GTEX-12ZZW-0011-R5a-SM-5DUVN	Brain - Caudate (basal ganglia)	Brain	male	GTEX-12ZZW	GTEX
GTEX-12ZZW-0011-R6a-SM-5DUVZ	Brain - Nucleus accumbens (basal ganglia)	Brain	male	GTEX-12ZZW	GTEX
GTEX-12ZZW-0011-R7a-SM-5DUWC	Brain - Putamen (basal ganglia)	Brain	male	GTEX-12ZZW	GTEX
GTEX-12ZZW-0126-SM-5DUVB	Skin - Sun Exposed (Lower leg)	Skin	male	GTEX-12ZZW	GTEX
GTEX-12ZZW-0426-SM-5GCO9	Artery - Tibial	Blood Vessel	male	GTEX-12ZZW	GTEX
GTEX-12ZZW-0926-SM-5LZUD	Lung	Lung	male	GTEX-12ZZW	GTEX
GTEX-12ZZW-1026-SM-5GCMM	Heart - Left Ventricle	Heart	male	GTEX-12ZZW	GTEX
GTEX-12ZZW-1726-SM-5DUVD	Esophagus - Mucosa	Esophagus	male	GTEX-12ZZW	GTEX
GTEX-12ZZW-2326-SM-5DUW2	Adipose - Visceral (Omentum)	Adipose Tissue	male	GTEX-12ZZW	GTEX
GTEX-12ZZW-2426-SM-5DUWE	Colon - Sigmoid	Colon	male	GTEX-12ZZW	GTEX
GTEX-12ZZW-2926-SM-5LZUP	Brain - Cortex	Brain	male	GTEX-12ZZW	GTEX
GTEX-12ZZW-3026-SM-5LZW7	Pituitary	Pituitary	male	GTEX-12ZZW	GTEX
GTEX-12ZZX-0005-SM-5O9A9	Whole Blood	Blood	female	GTEX-12ZZX	GTEX
GTEX-12ZZX-0011-R10b-SM-5DUWK	Brain - Frontal Cortex (BA9)	Brain	female	GTEX-12ZZX	GTEX
GTEX-12ZZX-0011-R11a-SM-5DUVJ	Brain - Cerebellar Hemisphere	Brain	female	GTEX-12ZZX	GTEX
GTEX-12ZZX-0011-R1a-SM-5EQ6B	Brain - Hippocampus	Brain	female	GTEX-12ZZX	GTEX
GTEX-12ZZX-0011-R2a-SM-5EGLG	Brain - Substantia nigra	Brain	female	GTEX-12ZZX	GTEX
GTEX-12ZZX-0011-R3b-SM-5EGLH	Brain - Anterior cingulate cortex (BA24)	Brain	female	GTEX-12ZZX	GTEX
GTEX-12ZZX-0011-R5a-SM-5HL89	Brain - Caudate (basal ganglia)	Brain	female	GTEX-12ZZX	GTEX
GTEX-12ZZX-0011-R6a-SM-5HL8L	Brain - Nucleus accumbens (basal ganglia)	Brain	female	GTEX-12ZZX	GTEX
GTEX-12ZZX-0011-R7b-SM-5DUVV	Brain - Putamen (basal ganglia)	Brain	female	GTEX-12ZZX	GTEX
GTEX-12ZZX-0011-R8a-SM-5DUW8	Brain - Hypothalamus	Brain	female	GTEX-12ZZX	GTEX
GTEX-12ZZX-0126-SM-5EGK9	Skin - Sun Exposed (Lower leg)	Skin	female	GTEX-12ZZX	GTEX
GTEX-12ZZX-0226-SM-5DUXU	Adipose - Subcutaneous	Adipose Tissue	female	GTEX-12ZZX	GTEX
GTEX-12ZZX-0326-SM-5DUVH	Muscle - Skeletal	Muscle	female	GTEX-12ZZX	GTEX
GTEX-12ZZX-0426-SM-5DUVT	Nerve - Tibial	Nerve	female	GTEX-12ZZX	GTEX
GTEX-12ZZX-0526-SM-5DUW6	Artery - Tibial	Blood Vessel	female	GTEX-12ZZX	GTEX
GTEX-12ZZX-0626-SM-5EQ46	Artery - Coronary	Blood Vessel	female	GTEX-12ZZX	GTEX
GTEX-12ZZX-0726-SM-5EGKA	Heart - Atrial Appendage	Heart	female	GTEX-12ZZX	GTEX
GTEX-12ZZX-1026-SM-5LZUW	Artery - Aorta	Blood Vessel	female	GTEX-12ZZX	GTEX
GTEX-12ZZX-1126-SM-5EGKB	Breast - Mammary Tissue	Breast	female	GTEX-12ZZX	GTEX
GTEX-12ZZX-1226-SM-5EGHS	Thyroid	Thyroid	female	GTEX-12ZZX	GTEX
GTEX-12ZZX-1326-SM-5DUWI	Esophagus - Mucosa	Esophagus	female	GTEX-12ZZX	GTEX
GTEX-12ZZX-1726-SM-5BC63	Adipose - Visceral (Omentum)	Adipose Tissue	female	GTEX-12ZZX	GTEX
GTEX-12ZZX-1926-SM-5EGKC	Vagina	Vagina	female	GTEX-12ZZX	GTEX
GTEX-12ZZX-2026-SM-5LZV9	Ovary	Ovary	female	GTEX-12ZZX	GTEX
GTEX-12ZZX-2126-SM-5LZVL	Uterus	Uterus	female	GTEX-12ZZX	GTEX
GTEX-12ZZX-2426-SM-5GCOE	Skin - Not Sun Exposed (Suprapubic)	Skin	female	GTEX-12ZZX	GTEX
GTEX-12ZZX-2726-SM-5N9FT	Colon - Sigmoid	Colon	female	GTEX-12ZZX	GTEX
GTEX-12ZZX-2826-SM-5BC6K	Brain - Cerebellum	Brain	female	GTEX-12ZZX	GTEX
GTEX-12ZZX-2926-SM-5GCOQ	Brain - Cortex	Brain	female	GTEX-12ZZX	GTEX
GTEX-12ZZX-3026-SM-5GCP3	Pituitary	Pituitary	female	GTEX-12ZZX	GTEX
GTEX-12ZZY-0011-R10b-SM-5HL7W	Brain - Frontal Cortex (BA9)	Brain	male	GTEX-12ZZY	GTEX
GTEX-12ZZY-0011-R5a-SM-5EGL9	Brain - Caudate (basal ganglia)	Brain	male	GTEX-12ZZY	GTEX
GTEX-12ZZY-0011-R6b-SM-5EGLA	Brain - Nucleus accumbens (basal ganglia)	Brain	male	GTEX-12ZZY	GTEX
GTEX-12ZZY-0011-R7a-SM-5EGLB	Brain - Putamen (basal ganglia)	Brain	male	GTEX-12ZZY	GTEX
GTEX-12ZZY-0126-SM-5LZV2	Testis	Testis	male	GTEX-12ZZY	GTEX
GTEX-12ZZY-0226-SM-5LZVE	Skin - Sun Exposed (Lower leg)	Skin	male	GTEX-12ZZY	GTEX
GTEX-12ZZY-0326-SM-5LZVQ	Adipose - Subcutaneous	Adipose Tissue	male	GTEX-12ZZY	GTEX
GTEX-12ZZY-0426-SM-5LZW3	Nerve - Tibial	Nerve	male	GTEX-12ZZY	GTEX
GTEX-12ZZY-0526-SM-5EQ5H	Artery - Tibial	Blood Vessel	male	GTEX-12ZZY	GTEX
GTEX-12ZZY-0626-SM-5EQ5T	Muscle - Skeletal	Muscle	male	GTEX-12ZZY	GTEX
GTEX-12ZZY-0726-SM-5EQ66	Skin - Not Sun Exposed (Suprapubic)	Skin	male	GTEX-12ZZY	GTEX
GTEX-12ZZY-0826-SM-5EQMT	Thyroid	Thyroid	male	GTEX-12ZZY	GTEX
GTEX-12ZZY-0926-SM-5EQ6I	Lung	Lung	male	GTEX-12ZZY	GTEX
GTEX-12ZZY-1126-SM-5DUWQ	Heart - Left Ventricle	Heart	male	GTEX-12ZZY	GTEX
GTEX-12ZZY-1226-SM-5GCNK	Heart - Atrial Appendage	Heart	male	GTEX-12ZZY	GTEX
GTEX-12ZZY-1326-SM-5GCNW	Artery - Aorta	Blood Vessel	male	GTEX-12ZZY	GTEX
GTEX-12ZZY-1426-SM-5N9EI	Esophagus - Mucosa	Esophagus	male	GTEX-12ZZY	GTEX
GTEX-12ZZY-1526-SM-5LZWF	Esophagus - Muscularis	Esophagus	male	GTEX-12ZZY	GTEX
GTEX-12ZZY-2726-SM-5EQ45	Colon - Sigmoid	Colon	male	GTEX-12ZZY	GTEX
GTEX-12ZZY-2926-SM-5DUXO	Brain - Cerebellum	Brain	male	GTEX-12ZZY	GTEX
GTEX-12ZZY-3026-SM-5GCOU	Brain - Cortex	Brain	male	GTEX-12ZZY	GTEX
GTEX-12ZZY-3126-SM-5DUX3	Pituitary	Pituitary	male	GTEX-12ZZY	GTEX
GTEX-12ZZZ-0011-R10a-SM-5P9HC	Brain - Frontal Cortex (BA9)	Brain	male	GTEX-12ZZZ	GTEX
GTEX-12ZZZ-0011-R11a-SM-5EGLC	Brain - Cerebellar Hemisphere	Brain	male	GTEX-12ZZZ	GTEX
GTEX-12ZZZ-0011-R3b-SM-5DUXK	Brain - Anterior cingulate cortex (BA24)	Brain	male	GTEX-12ZZZ	GTEX
GTEX-12ZZZ-0011-R4b-SM-5DUV7	Brain - Amygdala	Brain	male	GTEX-12ZZZ	GTEX
GTEX-12ZZZ-0011-R5a-SM-5EQ4M	Brain - Caudate (basal ganglia)	Brain	male	GTEX-12ZZZ	GTEX
GTEX-12ZZZ-0011-R6b-SM-5EQ5B	Brain - Nucleus accumbens (basal ganglia)	Brain	male	GTEX-12ZZZ	GTEX
GTEX-12ZZZ-0011-R7b-SM-5EGLE	Brain - Putamen (basal ganglia)	Brain	male	GTEX-12ZZZ	GTEX
GTEX-12ZZZ-0226-SM-59HKU	Muscle - Skeletal	Muscle	male	GTEX-12ZZZ	GTEX
GTEX-12ZZZ-0526-SM-5DUX6	Adipose - Subcutaneous	Adipose Tissue	male	GTEX-12ZZZ	GTEX
GTEX-12ZZZ-0626-SM-5DUXI	Skin - Sun Exposed (Lower leg)	Skin	male	GTEX-12ZZZ	GTEX
GTEX-12ZZZ-0726-SM-5GCNZ	Skin - Not Sun Exposed (Suprapubic)	Skin	male	GTEX-12ZZZ	GTEX
GTEX-12ZZZ-0926-SM-5N9EQ	Adrenal Gland	Adrenal Gland	male	GTEX-12ZZZ	GTEX
GTEX-12ZZZ-1226-SM-59HK1	Thyroid	Thyroid	male	GTEX-12ZZZ	GTEX
GTEX-12ZZZ-1326-SM-59HKW	Liver	Liver	male	GTEX-12ZZZ	GTEX
GTEX-12ZZZ-1726-SM-59HK5	Heart - Left Ventricle	Heart	male	GTEX-12ZZZ	GTEX
GTEX-12ZZZ-2026-SM-5LZWJ	Prostate	Prostate	male	GTEX-12ZZZ	GTEX
GTEX-12ZZZ-2426-SM-5GCNN	Colon - Transverse	Colon	male	GTEX-12ZZZ	GTEX
GTEX-12ZZZ-3026-SM-5BC67	Brain - Cortex	Brain	male	GTEX-12ZZZ	GTEX
GTEX-12ZZZ-3126-SM-5LZU6	Brain - Cerebellum	Brain	male	GTEX-12ZZZ	GTEX
GTEX-13111-0005-SM-5NQ7Z	Whole Blood	Blood	male	GTEX-13111	GTEX
GTEX-13111-0126-SM-5EGHO	Spleen	Spleen	male	GTEX-13111	GTEX
GTEX-13111-0226-SM-5EQ55	Thyroid	Thyroid	male	GTEX-13111	GTEX
GTEX-13111-0326-SM-5DUXF	Adrenal Gland	Adrenal Gland	male	GTEX-13111	GTEX
GTEX-13111-0426-SM-5DUXR	Lung	Lung	male	GTEX-13111	GTEX
GTEX-13111-0526-SM-5LZVF	Artery - Aorta	Blood Vessel	male	GTEX-13111	GTEX
GTEX-13111-0626-SM-5LZVR	Adipose - Visceral (Omentum)	Adipose Tissue	male	GTEX-13111	GTEX
GTEX-13111-0726-SM-5DUVE	Colon - Transverse	Colon	male	GTEX-13111	GTEX
GTEX-13111-0826-SM-5LZV3	Esophagus - Mucosa	Esophagus	male	GTEX-13111	GTEX
GTEX-13111-0926-SM-5DUVQ	Esophagus - Muscularis	Esophagus	male	GTEX-13111	GTEX
GTEX-13111-1126-SM-5GCMZ	Esophagus - Gastroesophageal Junction	Esophagus	male	GTEX-13111	GTEX
GTEX-13111-1226-SM-5GCNC	Stomach	Stomach	male	GTEX-13111	GTEX
GTEX-13111-1326-SM-5GCNO	Prostate	Prostate	male	GTEX-13111	GTEX
GTEX-13111-1426-SM-5DUW3	Small Intestine - Terminal Ileum	Small Intestine	male	GTEX-13111	GTEX
GTEX-13111-1526-SM-5EGJX	Testis	Testis	male	GTEX-13111	GTEX
GTEX-13111-1626-SM-5EGJY	Skin - Sun Exposed (Lower leg)	Skin	male	GTEX-13111	GTEX
GTEX-13111-1726-SM-5EGJZ	Adipose - Subcutaneous	Adipose Tissue	male	GTEX-13111	GTEX
GTEX-13111-1826-SM-5GCP1	Skin - Not Sun Exposed (Suprapubic)	Skin	male	GTEX-13111	GTEX
GTEX-13111-1926-SM-5GCOL	Colon - Sigmoid	Colon	male	GTEX-13111	GTEX
GTEX-13111-2026-SM-5GCMN	Nerve - Tibial	Nerve	male	GTEX-13111	GTEX
GTEX-13111-2126-SM-5LZU2	Artery - Tibial	Blood Vessel	male	GTEX-13111	GTEX
GTEX-13111-2226-SM-5LZUE	Muscle - Skeletal	Muscle	male	GTEX-13111	GTEX
GTEX-13111-2326-SM-5LZUQ	Minor Salivary Gland	Salivary Gland	male	GTEX-13111	GTEX
GTEX-13112-0011-R1b-SM-5HL7K	Brain - Hippocampus	Brain	male	GTEX-13112	GTEX
GTEX-13112-0011-R3b-SM-5HL9L	Brain - Anterior cingulate cortex (BA24)	Brain	male	GTEX-13112	GTEX
GTEX-13112-0011-R4b-SM-5DUXL	Brain - Amygdala	Brain	male	GTEX-13112	GTEX
GTEX-13112-0011-R5b-SM-5DUV8	Brain - Caudate (basal ganglia)	Brain	male	GTEX-13112	GTEX
GTEX-13112-0011-R6b-SM-5DUVK	Brain - Nucleus accumbens (basal ganglia)	Brain	male	GTEX-13112	GTEX
GTEX-13112-0011-R7b-SM-5DUVW	Brain - Putamen (basal ganglia)	Brain	male	GTEX-13112	GTEX
GTEX-13112-0126-SM-5P9IU	Skin - Not Sun Exposed (Suprapubic)	Skin	male	GTEX-13112	GTEX
GTEX-13112-0226-SM-5P9IV	Testis	Testis	male	GTEX-13112	GTEX
GTEX-13112-0326-SM-5P9IW	Thyroid	Thyroid	male	GTEX-13112	GTEX
GTEX-13112-0426-SM-5PNVC	Heart - Left Ventricle	Heart	male	GTEX-13112	GTEX
GTEX-13112-0526-SM-5EQ4S	Heart - Atrial Appendage	Heart	male	GTEX-13112	GTEX
GTEX-13112-1126-SM-5GCMY	Adipose - Visceral (Omentum)	Adipose Tissue	male	GTEX-13112	GTEX
GTEX-13112-1426-SM-5EGH8	Liver	Liver	male	GTEX-13112	GTEX
GTEX-13112-2126-SM-5GCO4	Kidney - Cortex	Kidney	male	GTEX-13112	GTEX
GTEX-13112-2626-SM-5BC66	Muscle - Skeletal	Muscle	male	GTEX-13112	GTEX
GTEX-13112-2726-SM-5DUW5	Adipose - Subcutaneous	Adipose Tissue	male	GTEX-13112	GTEX
GTEX-13112-2826-SM-5DUWH	Skin - Sun Exposed (Lower leg)	Skin	male	GTEX-13112	GTEX
GTEX-13112-2926-SM-5DUWT	Brain - Cerebellum	Brain	male	GTEX-13112	GTEX
GTEX-13112-3126-SM-5IFGP	Pituitary	Pituitary	male	GTEX-13112	GTEX
GTEX-13113-0006-SM-5NQ7X	Whole Blood	Blood	female	GTEX-13113	GTEX
GTEX-13113-0126-SM-5LZVX	Thyroid	Thyroid	female	GTEX-13113	GTEX
GTEX-13113-0426-SM-5GCOD	Lung	Lung	female	GTEX-13113	GTEX
GTEX-13113-0526-SM-5GCN2	Artery - Aorta	Blood Vessel	female	GTEX-13113	GTEX
GTEX-13113-0626-SM-5GCP2	Esophagus - Gastroesophageal Junction	Esophagus	female	GTEX-13113	GTEX
GTEX-13113-0726-SM-5LZUF	Stomach	Stomach	female	GTEX-13113	GTEX
GTEX-13113-1026-SM-5LZWM	Esophagus - Muscularis	Esophagus	female	GTEX-13113	GTEX
GTEX-13113-1126-SM-5LZU9	Adipose - Visceral (Omentum)	Adipose Tissue	female	GTEX-13113	GTEX
GTEX-13113-1226-SM-5EGHT	Small Intestine - Terminal Ileum	Small Intestine	female	GTEX-13113	GTEX
GTEX-13113-1326-SM-5GCOI	Liver	Liver	female	GTEX-13113	GTEX
GTEX-13113-1426-SM-5EGHU	Colon - Sigmoid	Colon	female	GTEX-13113	GTEX
GTEX-13113-1526-SM-5EGHV	Minor Salivary Gland	Salivary Gland	female	GTEX-13113	GTEX
GTEX-13113-1626-SM-5EQ4I	Skin - Not Sun Exposed (Suprapubic)	Skin	female	GTEX-13113	GTEX
GTEX-13113-1726-SM-5GCOO	Breast - Mammary Tissue	Breast	female	GTEX-13113	GTEX
GTEX-13113-1826-SM-5LZW4	Adipose - Subcutaneous	Adipose Tissue	female	GTEX-13113	GTEX
GTEX-13113-1926-SM-5LZWG	Skin - Sun Exposed (Lower leg)	Skin	female	GTEX-13113	GTEX
GTEX-13113-2026-SM-5LZU3	Nerve - Tibial	Nerve	female	GTEX-13113	GTEX
GTEX-13113-2126-SM-5EQ4U	Artery - Tibial	Blood Vessel	female	GTEX-13113	GTEX
GTEX-1313W-0006-SM-5O9B1	Whole Blood	Blood	female	GTEX-1313W	GTEX
GTEX-1313W-0011-R10b-SM-5DUXA	Brain - Frontal Cortex (BA9)	Brain	female	GTEX-1313W	GTEX
GTEX-1313W-0011-R11a-SM-5DUXN	Brain - Cerebellar Hemisphere	Brain	female	GTEX-1313W	GTEX
GTEX-1313W-0011-R1b-SM-5EQ4A	Brain - Hippocampus	Brain	female	GTEX-1313W	GTEX
GTEX-1313W-0011-R2a-SM-5EGLF	Brain - Substantia nigra	Brain	female	GTEX-1313W	GTEX
GTEX-1313W-0011-R3a-SM-5EGLI	Brain - Anterior cingulate cortex (BA24)	Brain	female	GTEX-1313W	GTEX
GTEX-1313W-0011-R4b-SM-5KLZV	Brain - Amygdala	Brain	female	GTEX-1313W	GTEX
GTEX-1313W-0011-R5b-SM-5L3EP	Brain - Caudate (basal ganglia)	Brain	female	GTEX-1313W	GTEX
GTEX-1313W-0011-R6a-SM-5K7XO	Brain - Nucleus accumbens (basal ganglia)	Brain	female	GTEX-1313W	GTEX
GTEX-1313W-0011-R7b-SM-5DUWL	Brain - Putamen (basal ganglia)	Brain	female	GTEX-1313W	GTEX
GTEX-1313W-0011-R8a-SM-5DUVM	Brain - Hypothalamus	Brain	female	GTEX-1313W	GTEX
GTEX-1313W-0126-SM-5LZUN	Skin - Sun Exposed (Lower leg)	Skin	female	GTEX-1313W	GTEX
GTEX-1313W-0226-SM-5LZV7	Adipose - Subcutaneous	Adipose Tissue	female	GTEX-1313W	GTEX
GTEX-1313W-0326-SM-5LZU5	Nerve - Tibial	Nerve	female	GTEX-1313W	GTEX
GTEX-1313W-0526-SM-5P9FZ	Muscle - Skeletal	Muscle	female	GTEX-1313W	GTEX
GTEX-1313W-0626-SM-5EQ4H	Skin - Not Sun Exposed (Suprapubic)	Skin	female	GTEX-1313W	GTEX
GTEX-1313W-0726-SM-5EGK1	Thyroid	Thyroid	female	GTEX-1313W	GTEX
GTEX-1313W-0826-SM-5EQ4T	Breast - Mammary Tissue	Breast	female	GTEX-1313W	GTEX
GTEX-1313W-0926-SM-5EQ56	Lung	Lung	female	GTEX-1313W	GTEX
GTEX-1313W-1026-SM-5EQ5I	Artery - Aorta	Blood Vessel	female	GTEX-1313W	GTEX
GTEX-1313W-1126-SM-5EQ5U	Heart - Atrial Appendage	Heart	female	GTEX-1313W	GTEX
GTEX-1313W-1426-SM-5KLZU	Heart - Left Ventricle	Heart	female	GTEX-1313W	GTEX
GTEX-1313W-1626-SM-5J1OE	Adipose - Visceral (Omentum)	Adipose Tissue	female	GTEX-1313W	GTEX
GTEX-1313W-2726-SM-5P9IX	Ovary	Ovary	female	GTEX-1313W	GTEX
GTEX-1313W-2826-SM-5P9G1	Uterus	Uterus	female	GTEX-1313W	GTEX
GTEX-1313W-3026-SM-5LZUZ	Brain - Cerebellum	Brain	female	GTEX-1313W	GTEX
GTEX-1313W-3126-SM-5LZUI	Brain - Cortex	Brain	female	GTEX-1313W	GTEX
GTEX-1313W-3226-SM-5LZUU	Pituitary	Pituitary	female	GTEX-1313W	GTEX
GTEX-1314G-0005-SM-5NQ9O	Whole Blood	Blood	male	GTEX-1314G	GTEX
GTEX-1314G-0126-SM-5LZUL	Heart - Left Ventricle	Heart	male	GTEX-1314G	GTEX
GTEX-1314G-0826-SM-5BC6L	Esophagus - Mucosa	Esophagus	male	GTEX-1314G	GTEX
GTEX-1314G-1226-SM-5BC6D	Breast - Mammary Tissue	Breast	male	GTEX-1314G	GTEX
GTEX-1314G-1326-SM-5BC6E	Skin - Not Sun Exposed (Suprapubic)	Skin	male	GTEX-1314G	GTEX
GTEX-1314G-1526-SM-5EGK2	Skin - Sun Exposed (Lower leg)	Skin	male	GTEX-1314G	GTEX
GTEX-1314G-1626-SM-5EQ67	Adipose - Subcutaneous	Adipose Tissue	male	GTEX-1314G	GTEX
GTEX-1314G-1726-SM-5LZUX	Muscle - Skeletal	Muscle	male	GTEX-1314G	GTEX
GTEX-1314G-1826-SM-5LZVA	Nerve - Tibial	Nerve	male	GTEX-1314G	GTEX
GTEX-1314G-1926-SM-5BC6F	Artery - Tibial	Blood Vessel	male	GTEX-1314G	GTEX
GTEX-1314G-2026-SM-5LZUM	Minor Salivary Gland	Salivary Gland	male	GTEX-1314G	GTEX
GTEX-131XE-0006-SM-5P9F9	Whole Blood	Blood	male	GTEX-131XE	GTEX
GTEX-131XE-0126-SM-5LZVC	Thyroid	Thyroid	male	GTEX-131XE	GTEX
GTEX-131XE-0326-SM-5LZVO	Liver	Liver	male	GTEX-131XE	GTEX
GTEX-131XE-0426-SM-5IJF4	Testis	Testis	male	GTEX-131XE	GTEX
GTEX-131XE-0526-SM-5K7YT	Heart - Atrial Appendage	Heart	male	GTEX-131XE	GTEX
GTEX-131XE-0626-SM-5HL98	Heart - Left Ventricle	Heart	male	GTEX-131XE	GTEX
GTEX-131XE-0726-SM-5HL9K	Lung	Lung	male	GTEX-131XE	GTEX
GTEX-131XE-0826-SM-5HL9W	Colon - Transverse	Colon	male	GTEX-131XE	GTEX
GTEX-131XE-0926-SM-5HL7J	Small Intestine - Terminal Ileum	Small Intestine	male	GTEX-131XE	GTEX
GTEX-131XE-1026-SM-5EGKE	Colon - Sigmoid	Colon	male	GTEX-131XE	GTEX
GTEX-131XE-1126-SM-5EGHW	Spleen	Spleen	male	GTEX-131XE	GTEX
GTEX-131XE-1226-SM-5EGKF	Esophagus - Muscularis	Esophagus	male	GTEX-131XE	GTEX
GTEX-131XE-1426-SM-5HL7V	Esophagus - Mucosa	Esophagus	male	GTEX-131XE	GTEX
GTEX-131XE-1526-SM-5KM1A	Esophagus - Gastroesophageal Junction	Esophagus	male	GTEX-131XE	GTEX
GTEX-131XE-1626-SM-5K7VO	Skin - Not Sun Exposed (Suprapubic)	Skin	male	GTEX-131XE	GTEX
GTEX-131XE-1926-SM-5IFER	Pancreas	Pancreas	male	GTEX-131XE	GTEX
GTEX-131XE-2026-SM-5LZW1	Adipose - Visceral (Omentum)	Adipose Tissue	male	GTEX-131XE	GTEX
GTEX-131XE-2226-SM-5PNYX	Stomach	Stomach	male	GTEX-131XE	GTEX
GTEX-131XE-2326-SM-5PNZ2	Skin - Sun Exposed (Lower leg)	Skin	male	GTEX-131XE	GTEX
GTEX-131XE-2426-SM-5EQ5V	Adipose - Subcutaneous	Adipose Tissue	male	GTEX-131XE	GTEX
GTEX-131XE-2526-SM-5EQ57	Nerve - Tibial	Nerve	male	GTEX-131XE	GTEX
GTEX-131XE-2626-SM-5PNYY	Artery - Tibial	Blood Vessel	male	GTEX-131XE	GTEX
GTEX-131XE-2726-SM-5P9G7	Muscle - Skeletal	Muscle	male	GTEX-131XE	GTEX
GTEX-131XF-0006-SM-5P9HK	Whole Blood	Blood	male	GTEX-131XF	GTEX
GTEX-131XF-0126-SM-5DUVF	Adrenal Gland	Adrenal Gland	male	GTEX-131XF	GTEX
GTEX-131XF-0326-SM-5DUVR	Heart - Left Ventricle	Heart	male	GTEX-131XF	GTEX
GTEX-131XF-0426-SM-5HL7U	Heart - Atrial Appendage	Heart	male	GTEX-131XF	GTEX
GTEX-131XF-0526-SM-5HL87	Artery - Coronary	Blood Vessel	male	GTEX-131XF	GTEX
GTEX-131XF-0626-SM-5GIDS	Artery - Aorta	Blood Vessel	male	GTEX-131XF	GTEX
GTEX-131XF-0726-SM-5GIE5	Adipose - Visceral (Omentum)	Adipose Tissue	male	GTEX-131XF	GTEX
GTEX-131XF-0826-SM-5GICG	Esophagus - Mucosa	Esophagus	male	GTEX-131XF	GTEX
GTEX-131XF-0926-SM-5BC69	Esophagus - Muscularis	Esophagus	male	GTEX-131XF	GTEX
GTEX-131XF-1026-SM-5BC6A	Lung	Lung	male	GTEX-131XF	GTEX
GTEX-131XF-1126-SM-5HL8J	Esophagus - Gastroesophageal Junction	Esophagus	male	GTEX-131XF	GTEX
GTEX-131XF-1226-SM-5HL8V	Stomach	Stomach	male	GTEX-131XF	GTEX
GTEX-131XF-1326-SM-5GCMQ	Small Intestine - Terminal Ileum	Small Intestine	male	GTEX-131XF	GTEX
GTEX-131XF-1426-SM-5BC68	Pancreas	Pancreas	male	GTEX-131XF	GTEX
GTEX-131XF-1826-SM-5EGKG	Thyroid	Thyroid	male	GTEX-131XF	GTEX
GTEX-131XF-1926-SM-5DUW4	Prostate	Prostate	male	GTEX-131XF	GTEX
GTEX-131XF-2026-SM-5DUWG	Testis	Testis	male	GTEX-131XF	GTEX
GTEX-131XF-2126-SM-5DUWS	Skin - Sun Exposed (Lower leg)	Skin	male	GTEX-131XF	GTEX
GTEX-131XF-2226-SM-5EQKG	Adipose - Subcutaneous	Adipose Tissue	male	GTEX-131XF	GTEX
GTEX-131XF-2326-SM-5BC6B	Muscle - Skeletal	Muscle	male	GTEX-131XF	GTEX
GTEX-131XF-2426-SM-5BC6C	Nerve - Tibial	Nerve	male	GTEX-131XF	GTEX
GTEX-131XF-2526-SM-5EQ68	Artery - Tibial	Blood Vessel	male	GTEX-131XF	GTEX
GTEX-131XF-2626-SM-5EQ6K	Skin - Not Sun Exposed (Suprapubic)	Skin	male	GTEX-131XF	GTEX
GTEX-131XF-2826-SM-5EGKH	Minor Salivary Gland	Salivary Gland	male	GTEX-131XF	GTEX
GTEX-131XG-0006-SM-5O9CE	Whole Blood	Blood	female	GTEX-131XG	GTEX
GTEX-131XG-0126-SM-5K7UJ	Adipose - Visceral (Omentum)	Adipose Tissue	female	GTEX-131XG	GTEX
GTEX-131XG-0226-SM-5IFG1	Thyroid	Thyroid	female	GTEX-131XG	GTEX
GTEX-131XG-0326-SM-5L3DX	Skin - Not Sun Exposed (Suprapubic)	Skin	female	GTEX-131XG	GTEX
GTEX-131XG-0426-SM-5IFGD	Spleen	Spleen	female	GTEX-131XG	GTEX
GTEX-131XG-0526-SM-5DUWF	Heart - Atrial Appendage	Heart	female	GTEX-131XG	GTEX
GTEX-131XG-0626-SM-5GCMP	Heart - Left Ventricle	Heart	female	GTEX-131XG	GTEX
GTEX-131XG-0826-SM-5LZVS	Artery - Coronary	Blood Vessel	female	GTEX-131XG	GTEX
GTEX-131XG-0926-SM-5LZW5	Esophagus - Muscularis	Esophagus	female	GTEX-131XG	GTEX
GTEX-131XG-1026-SM-5GCMX	Esophagus - Mucosa	Esophagus	female	GTEX-131XG	GTEX
GTEX-131XG-1126-SM-5DUWR	Esophagus - Gastroesophageal Junction	Esophagus	female	GTEX-131XG	GTEX
GTEX-131XG-1226-SM-5EGH9	Stomach	Stomach	female	GTEX-131XG	GTEX
GTEX-131XG-1326-SM-5DUX4	Adrenal Gland	Adrenal Gland	female	GTEX-131XG	GTEX
GTEX-131XG-1426-SM-5GCMO	Pancreas	Pancreas	female	GTEX-131XG	GTEX
GTEX-131XG-1526-SM-5GCNQ	Colon - Sigmoid	Colon	female	GTEX-131XG	GTEX
GTEX-131XG-1726-SM-5LZUR	Small Intestine - Terminal Ileum	Small Intestine	female	GTEX-131XG	GTEX
GTEX-131XG-1826-SM-5LZV4	Colon - Transverse	Colon	female	GTEX-131XG	GTEX
GTEX-131XG-2026-SM-5GCN5	Uterus	Uterus	female	GTEX-131XG	GTEX
GTEX-131XG-2126-SM-5DUXG	Vagina	Vagina	female	GTEX-131XG	GTEX
GTEX-131XG-2226-SM-5DUXS	Artery - Tibial	Blood Vessel	female	GTEX-131XG	GTEX
GTEX-131XG-2326-SM-5HL8F	Muscle - Skeletal	Muscle	female	GTEX-131XG	GTEX
GTEX-131XG-2526-SM-5HL7F	Nerve - Tibial	Nerve	female	GTEX-131XG	GTEX
GTEX-131XG-2626-SM-5KM17	Skin - Sun Exposed (Lower leg)	Skin	female	GTEX-131XG	GTEX
GTEX-131XH-0006-SM-5O98V	Whole Blood	Blood	male	GTEX-131XH	GTEX
GTEX-131XH-0011-R10a-SM-5EGLJ	Brain - Frontal Cortex (BA9)	Brain	male	GTEX-131XH	GTEX
GTEX-131XH-0011-R11a-SM-5EGLN	Brain - Cerebellar Hemisphere	Brain	male	GTEX-131XH	GTEX
GTEX-131XH-0011-R1a-SM-5DUWA	Brain - Hippocampus	Brain	male	GTEX-131XH	GTEX
GTEX-131XH-0011-R2b-SM-5DUVY	Brain - Substantia nigra	Brain	male	GTEX-131XH	GTEX
GTEX-131XH-0011-R3b-SM-5DUWM	Brain - Anterior cingulate cortex (BA24)	Brain	male	GTEX-131XH	GTEX
GTEX-131XH-0011-R4b-SM-5DUWB	Brain - Amygdala	Brain	male	GTEX-131XH	GTEX
GTEX-131XH-0011-R6a-SM-5KM2G	Brain - Nucleus accumbens (basal ganglia)	Brain	male	GTEX-131XH	GTEX
GTEX-131XH-0011-R8a-SM-5EGLL	Brain - Hypothalamus	Brain	male	GTEX-131XH	GTEX
GTEX-131XH-0126-SM-5LZUY	Skin - Not Sun Exposed (Suprapubic)	Skin	male	GTEX-131XH	GTEX
GTEX-131XH-0226-SM-5LZVB	Heart - Left Ventricle	Heart	male	GTEX-131XH	GTEX
GTEX-131XH-0426-SM-5DUWU	Lung	Lung	male	GTEX-131XH	GTEX
GTEX-131XH-0526-SM-5DUX7	Thyroid	Thyroid	male	GTEX-131XH	GTEX
GTEX-131XH-0626-SM-5LZWH	Liver	Liver	male	GTEX-131XH	GTEX
GTEX-131XH-0826-SM-5GCN8	Adipose - Visceral (Omentum)	Adipose Tissue	male	GTEX-131XH	GTEX
GTEX-131XH-2226-SM-5DUXJ	Skin - Sun Exposed (Lower leg)	Skin	male	GTEX-131XH	GTEX
GTEX-131XH-2426-SM-5PNZ6	Artery - Tibial	Blood Vessel	male	GTEX-131XH	GTEX
GTEX-131XH-2526-SM-5GCND	Nerve - Tibial	Nerve	male	GTEX-131XH	GTEX
GTEX-131XH-2626-SM-5GCNP	Minor Salivary Gland	Salivary Gland	male	GTEX-131XH	GTEX
GTEX-131XH-2726-SM-5GCO2	Muscle - Skeletal	Muscle	male	GTEX-131XH	GTEX
GTEX-131XH-2926-SM-5LZU4	Brain - Cerebellum	Brain	male	GTEX-131XH	GTEX
GTEX-131XW-0006-SM-5O9AO	Whole Blood	Blood	female	GTEX-131XW	GTEX
GTEX-131XW-0011-R10a-SM-5DUVA	Brain - Frontal Cortex (BA9)	Brain	female	GTEX-131XW	GTEX
GTEX-131XW-0011-R11a-SM-5DUV9	Brain - Cerebellar Hemisphere	Brain	female	GTEX-131XW	GTEX
GTEX-131XW-0011-R6b-SM-5K7XY	Brain - Nucleus accumbens (basal ganglia)	Brain	female	GTEX-131XW	GTEX
GTEX-131XW-0011-R8a-SM-5DUWY	Brain - Hypothalamus	Brain	female	GTEX-131XW	GTEX
GTEX-131XW-0011-R9a-SM-5N9EO	Brain - Spinal cord (cervical c-1)	Brain	female	GTEX-131XW	GTEX
GTEX-131XW-0226-SM-5IJCA	Artery - Tibial	Blood Vessel	female	GTEX-131XW	GTEX
GTEX-131XW-0326-SM-5KM1J	Muscle - Skeletal	Muscle	female	GTEX-131XW	GTEX
GTEX-131XW-0426-SM-5LZWP	Skin - Sun Exposed (Lower leg)	Skin	female	GTEX-131XW	GTEX
GTEX-131XW-0526-SM-5PNXZ	Adipose - Subcutaneous	Adipose Tissue	female	GTEX-131XW	GTEX
GTEX-131XW-0626-SM-5PNVD	Skin - Not Sun Exposed (Suprapubic)	Skin	female	GTEX-131XW	GTEX
GTEX-131XW-0726-SM-5EGK3	Breast - Mammary Tissue	Breast	female	GTEX-131XW	GTEX
GTEX-131XW-1126-SM-5EGK4	Lung	Lung	female	GTEX-131XW	GTEX
GTEX-131XW-2226-SM-5PNY1	Artery - Aorta	Blood Vessel	female	GTEX-131XW	GTEX
GTEX-131XW-3126-SM-5LZUC	Brain - Cortex	Brain	female	GTEX-131XW	GTEX
GTEX-131XW-3226-SM-5LZUO	Pituitary	Pituitary	female	GTEX-131XW	GTEX
GTEX-131YS-0005-SM-5NQAS	Whole Blood	Blood	female	GTEX-131YS	GTEX
GTEX-131YS-0011-R10b-SM-5EQ5N	Brain - Frontal Cortex (BA9)	Brain	female	GTEX-131YS	GTEX
GTEX-131YS-0011-R11b-SM-5EGLM	Brain - Cerebellar Hemisphere	Brain	female	GTEX-131YS	GTEX
GTEX-131YS-0011-R1a-SM-5DUXC	Brain - Hippocampus	Brain	female	GTEX-131YS	GTEX
GTEX-131YS-0011-R3b-SM-5DUXB	Brain - Anterior cingulate cortex (BA24)	Brain	female	GTEX-131YS	GTEX
GTEX-131YS-0011-R4a-SM-5DUVL	Brain - Amygdala	Brain	female	GTEX-131YS	GTEX
GTEX-131YS-0011-R5b-SM-5K7YB	Brain - Caudate (basal ganglia)	Brain	female	GTEX-131YS	GTEX
GTEX-131YS-0011-R7a-SM-5IJDA	Brain - Putamen (basal ganglia)	Brain	female	GTEX-131YS	GTEX
GTEX-131YS-0011-R9b-SM-5EQLY	Brain - Spinal cord (cervical c-1)	Brain	female	GTEX-131YS	GTEX
GTEX-131YS-0126-SM-5KM1M	Skin - Sun Exposed (Lower leg)	Skin	female	GTEX-131YS	GTEX
GTEX-131YS-0226-SM-5IJEH	Adipose - Subcutaneous	Adipose Tissue	female	GTEX-131YS	GTEX
GTEX-131YS-0326-SM-5PNYW	Nerve - Tibial	Nerve	female	GTEX-131YS	GTEX
GTEX-131YS-0426-SM-5EQ4J	Artery - Tibial	Blood Vessel	female	GTEX-131YS	GTEX
GTEX-131YS-0526-SM-5EGKJ	Muscle - Skeletal	Muscle	female	GTEX-131YS	GTEX
GTEX-131YS-0626-SM-5EGKL	Breast - Mammary Tissue	Breast	female	GTEX-131YS	GTEX
GTEX-131YS-0726-SM-5P9G9	Thyroid	Thyroid	female	GTEX-131YS	GTEX
GTEX-131YS-0826-SM-5PNYV	Heart - Atrial Appendage	Heart	female	GTEX-131YS	GTEX
GTEX-131YS-0926-SM-5IJB9	Lung	Lung	female	GTEX-131YS	GTEX
GTEX-131YS-1126-SM-5N9FQ	Artery - Aorta	Blood Vessel	female	GTEX-131YS	GTEX
GTEX-131YS-1226-SM-5K7VE	Artery - Coronary	Blood Vessel	female	GTEX-131YS	GTEX
GTEX-131YS-1426-SM-5IJF7	Esophagus - Mucosa	Esophagus	female	GTEX-131YS	GTEX
GTEX-131YS-1626-SM-5HL6C	Liver	Liver	female	GTEX-131YS	GTEX
GTEX-131YS-1726-SM-5HL7G	Adipose - Visceral (Omentum)	Adipose Tissue	female	GTEX-131YS	GTEX
GTEX-131YS-2026-SM-5P9J8	Adrenal Gland	Adrenal Gland	female	GTEX-131YS	GTEX
GTEX-131YS-2226-SM-5P9G8	Ovary	Ovary	female	GTEX-131YS	GTEX
GTEX-131YS-2326-SM-5IJFJ	Uterus	Uterus	female	GTEX-131YS	GTEX
GTEX-131YS-2426-SM-5J2OD	Vagina	Vagina	female	GTEX-131YS	GTEX
GTEX-131YS-2826-SM-5EQ47	Skin - Not Sun Exposed (Suprapubic)	Skin	female	GTEX-131YS	GTEX
GTEX-131YS-2926-SM-5EGKI	Colon - Sigmoid	Colon	female	GTEX-131YS	GTEX
GTEX-131YS-3026-SM-5EGHY	Brain - Cerebellum	Brain	female	GTEX-131YS	GTEX
GTEX-131YS-3126-SM-5KLYT	Brain - Cortex	Brain	female	GTEX-131YS	GTEX
GTEX-131YS-3226-SM-5IFGV	Pituitary	Pituitary	female	GTEX-131YS	GTEX
GTEX-132AR-0006-SM-5NQ7N	Whole Blood	Blood	female	GTEX-132AR	GTEX
GTEX-132AR-0226-SM-5IJBE	Adipose - Subcutaneous	Adipose Tissue	female	GTEX-132AR	GTEX
GTEX-132AR-0326-SM-5KM2C	Skin - Not Sun Exposed (Suprapubic)	Skin	female	GTEX-132AR	GTEX
GTEX-132AR-0426-SM-5IFH8	Liver	Liver	female	GTEX-132AR	GTEX
GTEX-132AR-0526-SM-5J2MJ	Adipose - Visceral (Omentum)	Adipose Tissue	female	GTEX-132AR	GTEX
GTEX-132AR-0726-SM-5EQ6J	Artery - Tibial	Blood Vessel	female	GTEX-132AR	GTEX
GTEX-132AR-0826-SM-5EGK6	Breast - Mammary Tissue	Breast	female	GTEX-132AR	GTEX
GTEX-132AR-1026-SM-5PNVL	Muscle - Skeletal	Muscle	female	GTEX-132AR	GTEX
GTEX-132AR-1126-SM-5P9GA	Thyroid	Thyroid	female	GTEX-132AR	GTEX
GTEX-132AR-1326-SM-5K7YC	Artery - Coronary	Blood Vessel	female	GTEX-132AR	GTEX
GTEX-132AR-1426-SM-5IFF1	Ovary	Ovary	female	GTEX-132AR	GTEX
GTEX-132AR-1526-SM-5KM1L	Uterus	Uterus	female	GTEX-132AR	GTEX
GTEX-132AR-1626-SM-5EGHP	Vagina	Vagina	female	GTEX-132AR	GTEX
GTEX-132AR-1726-SM-5EGHQ	Adrenal Gland	Adrenal Gland	female	GTEX-132AR	GTEX
GTEX-132AR-1826-SM-5EGHR	Pancreas	Pancreas	female	GTEX-132AR	GTEX
GTEX-132AR-1926-SM-5EGK5	Heart - Atrial Appendage	Heart	female	GTEX-132AR	GTEX
GTEX-132AR-2026-SM-5IJG4	Heart - Left Ventricle	Heart	female	GTEX-132AR	GTEX
GTEX-132AR-2126-SM-5K7XG	Artery - Aorta	Blood Vessel	female	GTEX-132AR	GTEX
GTEX-132AR-2226-SM-5J2NT	Esophagus - Mucosa	Esophagus	female	GTEX-132AR	GTEX
GTEX-132AR-2326-SM-5IJDY	Esophagus - Muscularis	Esophagus	female	GTEX-132AR	GTEX
GTEX-132AR-2426-SM-5IFFD	Stomach	Stomach	female	GTEX-132AR	GTEX
GTEX-132AR-2526-SM-5PNVM	Esophagus - Gastroesophageal Junction	Esophagus	female	GTEX-132AR	GTEX
GTEX-132AR-2726-SM-5PNVN	Colon - Transverse	Colon	female	GTEX-132AR	GTEX
GTEX-132AR-2826-SM-5IJFV	Colon - Sigmoid	Colon	female	GTEX-132AR	GTEX
GTEX-132NY-0005-SM-5O9AC	Whole Blood	Blood	male	GTEX-132NY	GTEX
GTEX-132NY-0326-SM-5IJBL	Skin - Sun Exposed (Lower leg)	Skin	male	GTEX-132NY	GTEX
GTEX-132NY-0526-SM-5EQ4V	Nerve - Tibial	Nerve	male	GTEX-132NY	GTEX
GTEX-132NY-0626-SM-5L3D9	Artery - Tibial	Blood Vessel	male	GTEX-132NY	GTEX
GTEX-132NY-0726-SM-5KLZM	Muscle - Skeletal	Muscle	male	GTEX-132NY	GTEX
GTEX-132NY-0826-SM-5K7Y7	Breast - Mammary Tissue	Breast	male	GTEX-132NY	GTEX
GTEX-132NY-0926-SM-5P9G3	Liver	Liver	male	GTEX-132NY	GTEX
GTEX-132NY-1026-SM-5P9IY	Thyroid	Thyroid	male	GTEX-132NY	GTEX
GTEX-132NY-1126-SM-5PNVE	Adipose - Visceral (Omentum)	Adipose Tissue	male	GTEX-132NY	GTEX
GTEX-132NY-1226-SM-5PNVF	Lung	Lung	male	GTEX-132NY	GTEX
GTEX-132NY-1426-SM-5J1MJ	Heart - Atrial Appendage	Heart	male	GTEX-132NY	GTEX
GTEX-132NY-1726-SM-5EGKK	Heart - Left Ventricle	Heart	male	GTEX-132NY	GTEX
GTEX-132NY-2026-SM-5L3FM	Esophagus - Gastroesophageal Junction	Esophagus	male	GTEX-132NY	GTEX
GTEX-132NY-2226-SM-5J2LZ	Adrenal Gland	Adrenal Gland	male	GTEX-132NY	GTEX
GTEX-132NY-2726-SM-5PNY2	Colon - Sigmoid	Colon	male	GTEX-132NY	GTEX
GTEX-132NY-2826-SM-5P9G2	Prostate	Prostate	male	GTEX-132NY	GTEX
GTEX-132Q8-0006-SM-5NQA4	Whole Blood	Blood	male	GTEX-132Q8	GTEX
GTEX-132Q8-0011-R10b-SM-5DUWZ	Brain - Frontal Cortex (BA9)	Brain	male	GTEX-132Q8	GTEX
GTEX-132Q8-0011-R11b-SM-5DUW9	Brain - Cerebellar Hemisphere	Brain	male	GTEX-132Q8	GTEX
GTEX-132Q8-0011-R1a-SM-5EGLK	Brain - Hippocampus	Brain	male	GTEX-132Q8	GTEX
GTEX-132Q8-0011-R2b-SM-5EQ5Z	Brain - Substantia nigra	Brain	male	GTEX-132Q8	GTEX
GTEX-132Q8-0011-R5a-SM-5IJDM	Brain - Caudate (basal ganglia)	Brain	male	GTEX-132Q8	GTEX
GTEX-132Q8-0011-R7b-SM-5N9F1	Brain - Putamen (basal ganglia)	Brain	male	GTEX-132Q8	GTEX
GTEX-132Q8-0011-R8b-SM-5DUWX	Brain - Hypothalamus	Brain	male	GTEX-132Q8	GTEX
GTEX-132Q8-0526-SM-5IJBQ	Artery - Tibial	Blood Vessel	male	GTEX-132Q8	GTEX
GTEX-132Q8-0626-SM-5L3F3	Muscle - Skeletal	Muscle	male	GTEX-132Q8	GTEX
GTEX-132Q8-1126-SM-5K7XS	Heart - Atrial Appendage	Heart	male	GTEX-132Q8	GTEX
GTEX-132Q8-1426-SM-5EGK7	Breast - Mammary Tissue	Breast	male	GTEX-132Q8	GTEX
GTEX-132Q8-1726-SM-5EGK8	Adipose - Visceral (Omentum)	Adipose Tissue	male	GTEX-132Q8	GTEX
GTEX-132Q8-1826-SM-5EGIY	Esophagus - Mucosa	Esophagus	male	GTEX-132Q8	GTEX
GTEX-132Q8-2926-SM-5IFFP	Brain - Cerebellum	Brain	male	GTEX-132Q8	GTEX
GTEX-132Q8-3026-SM-5PNVG	Brain - Cortex	Brain	male	GTEX-132Q8	GTEX
GTEX-132QS-0005-SM-5LZXK	Whole Blood	Blood	male	GTEX-132QS	GTEX
GTEX-132QS-0126-SM-5IFH9	Adrenal Gland	Adrenal Gland	male	GTEX-132QS	GTEX
GTEX-132QS-0226-SM-5IFFZ	Spleen	Spleen	male	GTEX-132QS	GTEX
GTEX-132QS-0326-SM-5IJFN	Thyroid	Thyroid	male	GTEX-132QS	GTEX
GTEX-132QS-0426-SM-5KLZ6	Heart - Left Ventricle	Heart	male	GTEX-132QS	GTEX
GTEX-132QS-0526-SM-5IJC7	Heart - Atrial Appendage	Heart	male	GTEX-132QS	GTEX
GTEX-132QS-0726-SM-5IJE9	Lung	Lung	male	GTEX-132QS	GTEX
GTEX-132QS-0826-SM-5K7WV	Adipose - Visceral (Omentum)	Adipose Tissue	male	GTEX-132QS	GTEX
GTEX-132QS-0926-SM-5P9GB	Pancreas	Pancreas	male	GTEX-132QS	GTEX
GTEX-132QS-1126-SM-5P9GC	Prostate	Prostate	male	GTEX-132QS	GTEX
GTEX-132QS-1226-SM-5P9GD	Testis	Testis	male	GTEX-132QS	GTEX
GTEX-132QS-1426-SM-5P9GE	Esophagus - Mucosa	Esophagus	male	GTEX-132QS	GTEX
GTEX-132QS-1526-SM-5J2MV	Esophagus - Muscularis	Esophagus	male	GTEX-132QS	GTEX
GTEX-132QS-1626-SM-5K7YZ	Esophagus - Gastroesophageal Junction	Esophagus	male	GTEX-132QS	GTEX
GTEX-132QS-1826-SM-5IFFN	Stomach	Stomach	male	GTEX-132QS	GTEX
GTEX-1339X-0326-SM-5K7Z8	Heart - Atrial Appendage	Heart	male	GTEX-1339X	GTEX
GTEX-1339X-0426-SM-5KLZY	Heart - Left Ventricle	Heart	male	GTEX-1339X	GTEX
GTEX-1339X-0526-SM-5KLYW	Artery - Aorta	Blood Vessel	male	GTEX-1339X	GTEX
GTEX-1339X-0626-SM-5IJER	Lung	Lung	male	GTEX-1339X	GTEX
GTEX-1339X-0726-SM-5L3FF	Adipose - Visceral (Omentum)	Adipose Tissue	male	GTEX-1339X	GTEX
GTEX-1339X-0826-SM-5J2O6	Adrenal Gland	Adrenal Gland	male	GTEX-1339X	GTEX
GTEX-1339X-1026-SM-5IFH5	Pancreas	Pancreas	male	GTEX-1339X	GTEX
GTEX-1339X-1126-SM-5J2OI	Esophagus - Gastroesophageal Junction	Esophagus	male	GTEX-1339X	GTEX
GTEX-1339X-1226-SM-5PNVO	Esophagus - Mucosa	Esophagus	male	GTEX-1339X	GTEX
GTEX-1339X-1426-SM-5K7YO	Stomach	Stomach	male	GTEX-1339X	GTEX
GTEX-1339X-1726-SM-5P9J9	Colon - Sigmoid	Colon	male	GTEX-1339X	GTEX
GTEX-1339X-1926-SM-5PNVP	Testis	Testis	male	GTEX-1339X	GTEX
GTEX-1339X-2326-SM-5HL5B	Minor Salivary Gland	Salivary Gland	male	GTEX-1339X	GTEX
GTEX-1339X-2426-SM-5KLYU	Muscle - Skeletal	Muscle	male	GTEX-1339X	GTEX
GTEX-1339X-2626-SM-5K7YX	Artery - Tibial	Blood Vessel	male	GTEX-1339X	GTEX
GTEX-1339X-2726-SM-5PNYU	Nerve - Tibial	Nerve	male	GTEX-1339X	GTEX
GTEX-133LE-0226-SM-5PNY3	Artery - Aorta	Blood Vessel	female	GTEX-133LE	GTEX
GTEX-133LE-0326-SM-5P9G4	Thyroid	Thyroid	female	GTEX-133LE	GTEX
GTEX-133LE-0526-SM-5N9EJ	Lung	Lung	female	GTEX-133LE	GTEX
GTEX-133LE-0626-SM-5IFFJ	Esophagus - Mucosa	Esophagus	female	GTEX-133LE	GTEX
GTEX-133LE-0726-SM-5P9IZ	Esophagus - Muscularis	Esophagus	female	GTEX-133LE	GTEX
GTEX-133LE-0926-SM-5P9J1	Adipose - Visceral (Omentum)	Adipose Tissue	female	GTEX-133LE	GTEX
GTEX-133LE-1226-SM-5IFGC	Ovary	Ovary	female	GTEX-133LE	GTEX
GTEX-133LE-1326-SM-5IFGO	Stomach	Stomach	female	GTEX-133LE	GTEX
GTEX-133LE-1426-SM-5IFH1	Small Intestine - Terminal Ileum	Small Intestine	female	GTEX-133LE	GTEX
GTEX-133LE-1526-SM-5IFEN	Colon - Transverse	Colon	female	GTEX-133LE	GTEX
GTEX-133LE-1726-SM-5K7VQ	Breast - Mammary Tissue	Breast	female	GTEX-133LE	GTEX
GTEX-133LE-1826-SM-5J1MV	Skin - Sun Exposed (Lower leg)	Skin	female	GTEX-133LE	GTEX
GTEX-133LE-1926-SM-5N9FV	Adipose - Subcutaneous	Adipose Tissue	female	GTEX-133LE	GTEX
GTEX-133LE-2026-SM-5K7WM	Muscle - Skeletal	Muscle	female	GTEX-133LE	GTEX
GTEX-133LE-2126-SM-5IJBX	Nerve - Tibial	Nerve	female	GTEX-133LE	GTEX
GTEX-133LE-2226-SM-5IFGU	Artery - Tibial	Blood Vessel	female	GTEX-133LE	GTEX
GTEX-133LE-2326-SM-5K7W3	Skin - Not Sun Exposed (Suprapubic)	Skin	female	GTEX-133LE	GTEX
GTEX-1399Q-0005-SM-5NQAG	Whole Blood	Blood	male	GTEX-1399Q	GTEX
GTEX-1399Q-1126-SM-5P9JA	Esophagus - Mucosa	Esophagus	male	GTEX-1399Q	GTEX
GTEX-1399Q-2326-SM-5KM2X	Skin - Not Sun Exposed (Suprapubic)	Skin	male	GTEX-1399Q	GTEX
GTEX-1399Q-2426-SM-5J2MO	Muscle - Skeletal	Muscle	male	GTEX-1399Q	GTEX
GTEX-1399Q-2826-SM-5IJEZ	Testis	Testis	male	GTEX-1399Q	GTEX
GTEX-1399R-0006-SM-5N9FR	Whole Blood	Blood	male	GTEX-1399R	GTEX
GTEX-1399R-0126-SM-5IFEV	Thyroid	Thyroid	male	GTEX-1399R	GTEX
GTEX-1399R-0226-SM-5IJGG	Spleen	Spleen	male	GTEX-1399R	GTEX
GTEX-1399R-0326-SM-5KM1X	Adrenal Gland	Adrenal Gland	male	GTEX-1399R	GTEX
GTEX-1399R-0426-SM-5IJE3	Pancreas	Pancreas	male	GTEX-1399R	GTEX
GTEX-1399R-0526-SM-5IJEF	Prostate	Prostate	male	GTEX-1399R	GTEX
GTEX-1399R-0626-SM-5K7UZ	Artery - Aorta	Blood Vessel	male	GTEX-1399R	GTEX
GTEX-1399R-0726-SM-5KM2A	Esophagus - Muscularis	Esophagus	male	GTEX-1399R	GTEX
GTEX-1399R-0826-SM-5IJEL	Esophagus - Mucosa	Esophagus	male	GTEX-1399R	GTEX
GTEX-1399R-0926-SM-5J2N8	Esophagus - Gastroesophageal Junction	Esophagus	male	GTEX-1399R	GTEX
GTEX-1399R-1126-SM-5IFIO	Stomach	Stomach	male	GTEX-1399R	GTEX
GTEX-1399R-1226-SM-5P9GF	Liver	Liver	male	GTEX-1399R	GTEX
GTEX-1399R-1326-SM-5PNYS	Skin - Not Sun Exposed (Suprapubic)	Skin	male	GTEX-1399R	GTEX
GTEX-1399R-1626-SM-5P9GG	Testis	Testis	male	GTEX-1399R	GTEX
GTEX-1399R-1726-SM-5K7YJ	Heart - Atrial Appendage	Heart	male	GTEX-1399R	GTEX
GTEX-1399R-1826-SM-5J2M9	Artery - Coronary	Blood Vessel	male	GTEX-1399R	GTEX
GTEX-1399R-1926-SM-5K7X8	Heart - Left Ventricle	Heart	male	GTEX-1399R	GTEX
GTEX-1399R-2026-SM-5K7WN	Small Intestine - Terminal Ileum	Small Intestine	male	GTEX-1399R	GTEX
GTEX-1399R-2126-SM-5K7WZ	Colon - Sigmoid	Colon	male	GTEX-1399R	GTEX
GTEX-1399R-2226-SM-5P9JB	Colon - Transverse	Colon	male	GTEX-1399R	GTEX
GTEX-1399R-2326-SM-5PNYT	Artery - Tibial	Blood Vessel	male	GTEX-1399R	GTEX
GTEX-1399R-2426-SM-5IJFC	Nerve - Tibial	Nerve	male	GTEX-1399R	GTEX
GTEX-1399R-2526-SM-5IFG2	Muscle - Skeletal	Muscle	male	GTEX-1399R	GTEX
GTEX-1399R-2626-SM-5KLZ7	Adipose - Subcutaneous	Adipose Tissue	male	GTEX-1399R	GTEX
GTEX-1399R-2726-SM-5IJBA	Skin - Sun Exposed (Lower leg)	Skin	male	GTEX-1399R	GTEX
GTEX-1399S-0006-SM-5NQ7U	Whole Blood	Blood	female	GTEX-1399S	GTEX
GTEX-1399S-0126-SM-5IJCF	Skin - Not Sun Exposed (Suprapubic)	Skin	female	GTEX-1399S	GTEX
GTEX-1399S-0226-SM-5IFFG	Spleen	Spleen	female	GTEX-1399S	GTEX
GTEX-1399S-0326-SM-5IFFS	Pancreas	Pancreas	female	GTEX-1399S	GTEX
GTEX-1399S-0426-SM-5IFG5	Adrenal Gland	Adrenal Gland	female	GTEX-1399S	GTEX
GTEX-1399S-0526-SM-5IJG8	Kidney - Cortex	Kidney	female	GTEX-1399S	GTEX
GTEX-1399S-0826-SM-5KM23	Heart - Atrial Appendage	Heart	female	GTEX-1399S	GTEX
GTEX-1399S-0926-SM-5PNVQ	Artery - Coronary	Blood Vessel	female	GTEX-1399S	GTEX
GTEX-1399S-1026-SM-5KLZ9	Heart - Left Ventricle	Heart	female	GTEX-1399S	GTEX
GTEX-1399S-1226-SM-5J1O6	Esophagus - Muscularis	Esophagus	female	GTEX-1399S	GTEX
GTEX-1399S-1326-SM-5P9GH	Esophagus - Mucosa	Esophagus	female	GTEX-1399S	GTEX
GTEX-1399S-1426-SM-5PNYQ	Adipose - Visceral (Omentum)	Adipose Tissue	female	GTEX-1399S	GTEX
GTEX-1399S-1526-SM-5P9JC	Esophagus - Gastroesophageal Junction	Esophagus	female	GTEX-1399S	GTEX
GTEX-1399S-1626-SM-5P9GI	Stomach	Stomach	female	GTEX-1399S	GTEX
GTEX-1399S-1726-SM-5L3DI	Lung	Lung	female	GTEX-1399S	GTEX
GTEX-1399S-1926-SM-5J2M5	Colon - Transverse	Colon	female	GTEX-1399S	GTEX
GTEX-1399S-2026-SM-5KM4B	Small Intestine - Terminal Ileum	Small Intestine	female	GTEX-1399S	GTEX
GTEX-1399S-2126-SM-5J2MH	Ovary	Ovary	female	GTEX-1399S	GTEX
GTEX-1399S-2226-SM-5IFEW	Uterus	Uterus	female	GTEX-1399S	GTEX
GTEX-1399S-2326-SM-5K7YV	Vagina	Vagina	female	GTEX-1399S	GTEX
GTEX-1399S-2426-SM-5K7U3	Nerve - Tibial	Nerve	female	GTEX-1399S	GTEX
GTEX-1399S-2626-SM-5L3DU	Artery - Tibial	Blood Vessel	female	GTEX-1399S	GTEX
GTEX-1399S-2726-SM-5KM22	Muscle - Skeletal	Muscle	female	GTEX-1399S	GTEX
GTEX-1399T-0011-R11a-SM-5J2O1	Brain - Cerebellar Hemisphere	Brain	male	GTEX-1399T	GTEX
GTEX-1399T-0011-R1b-SM-5DUWN	Brain - Hippocampus	Brain	male	GTEX-1399T	GTEX
GTEX-1399T-0011-R2b-SM-5DUXM	Brain - Substantia nigra	Brain	male	GTEX-1399T	GTEX
GTEX-1399T-0011-R4b-SM-5DUVX	Brain - Amygdala	Brain	male	GTEX-1399T	GTEX
GTEX-1399T-0011-R5b-SM-5IJDK	Brain - Caudate (basal ganglia)	Brain	male	GTEX-1399T	GTEX
GTEX-1399T-0011-R6b-SM-5K7YL	Brain - Nucleus accumbens (basal ganglia)	Brain	male	GTEX-1399T	GTEX
GTEX-1399T-0011-R8b-SM-5IJD8	Brain - Hypothalamus	Brain	male	GTEX-1399T	GTEX
GTEX-1399T-0126-SM-5KM15	Thyroid	Thyroid	male	GTEX-1399T	GTEX
GTEX-1399T-0426-SM-5PNVJ	Heart - Left Ventricle	Heart	male	GTEX-1399T	GTEX
GTEX-1399T-0526-SM-5J1NC	Artery - Aorta	Blood Vessel	male	GTEX-1399T	GTEX
GTEX-1399T-0726-SM-5J1MH	Heart - Atrial Appendage	Heart	male	GTEX-1399T	GTEX
[truncated: 7,784 more rows]
